# Supplementary material
Source: PubMed Central journal article supplement (PMC6330093)
Supplement: NIHMS1004786-supplement-SI.pdf [file NIHMS1004786-supplement-SI.pdf]

## Supporting Information

### PEG-based Changes to $\beta$ -sheet Protein Conformational and Proteolytic Stability Depend on Conjugation Strategy and Location

Steven R. E. Draper,<sup>a</sup> Paul B. Lawrence,<sup>a</sup> Wendy M. Billings, Qiang Xiao, Nathaniel P. Brown, Natalie A. Becar, Derek J. Matheson, Andrew R. Stephens, and Joshua L. Price\*

Department of Chemistry and Biochemistry, Brigham Young University, Provo, Utah 84602, United States

<sup>a</sup>These authors contributed equally.

|                                                                |    |
|----------------------------------------------------------------|----|
| 1. Protein Synthesis, Purification, and Characterization ..... | 2  |
| 2. Biophysical Characterization of WW Variants .....           | 32 |
| 3. Proteolysis Experiments .....                               | 48 |

## 1. Protein Synthesis, Purification, and Characterization

Proteins **16N**, **16Np**, **18N**, **18Np**, **19Q**, **19Qp**, **19X**, **19Xp**, **19Z**, **19Zp**, **19N**, **19Np**, **19Nbp**, **23N**, **23Np**, **27N**, **27Np**, **29N**, **29Np**, **32N**, and **32Np** (sequences shown in Table S1) were synthesized previously.<sup>1, 2</sup> The remaining WW variants shown in Table 1 were synthesized as C-terminal acids by Fmoc-based microwave-assisted solid-phase peptide synthesis as described previously,<sup>2</sup> using the following reagents: Fmoc-Gly-loaded Novasyn Wang resin (EMD Biosciences); standard Fmoc-protected  $\alpha$ -amino acids with acid-labile side-chain protecting groups (EMD Biosciences or Advanced ChemTech); previously synthesized Fmoc-L-GlnPEG<sub>4</sub>-OH [18-(((9H-fluoren-9-yl)methoxy)carbonyl)amino)-15-oxo-2,5,8,11-tetraoxa-14-azanodecan-19-oic acid],<sup>2</sup> used to prepare proteins **16Qp**, **18Qp**, **23Qp**, **27Qp**, **29Qp**, and **32Qp**; commercially available Fmoc-L-4-azidohomoalanine, used to prepare proteins **16X**, **18X**, **23X**, **27X**, **29X**, and **32X**; previously synthesized PEG-alkyne 2,5,8,11-tetraoxatetradec-13-yne<sup>3</sup> used to prepare **16Xp**, **18Xp**, **23Xp**, **27Xp**, **29Xp**, and **32Xp** from proteins **16X**, **18X**, **23X**, **27X**, **29X**, and **32X** via the copper (I) catalyzed azide-alkyne cycloaddition<sup>3</sup>; previously synthesized Fmoc-L-PrF-OH N-[(9H-Fluoren-9-ylmethoxy)-O-2-propyn-1-yl-L-tyrosine]<sup>4</sup>, used to prepare proteins **16Z**, **18Z**, **23Z**, **27Z**, **29Z**, and **32Z**; commercially available PEG-azide 13-azido-2,5,8,11-tetraoxatridecane, used to prepare proteins **16Zp**, **18Zp**, **23Zp**, **27Zp**, **29Zp**, and **32Zp** from proteins **18Z**, **23Z**, **27Z**, **29Z**, and **32Z** via the copper (I) catalyzed azide-alkyne cycloaddition<sup>3</sup>; previously synthesized Fmoc-L-(AsnPEG<sub>4</sub>)<sub>2</sub>-OH [(S)-17-(((9H-fluoren-9-yl)methoxy)carbonyl)amino)-15-oxo-14-(2,5,8,11-tetraoxatridecan-13-yl)-2,5,8,11-tetraoxa-14-azaoctadecan-18-oic acid],<sup>3</sup> used to prepare proteins **16Nbp**, **18Nbp**, **23Nbp**, **27Nbp**, **29Nbp**, and **32Nbp**; 2-(1H-benzotriazole-1-yl)-1,1,3,3-tetramethyluronium hexafluorophosphate (HBTU) and N-hydroxybenzotriazole hydrate (HOBT) from Advanced ChemTech for amino acid activation; 20% piperidine in N,N-dimethylformamide for removal of the Fmoc protecting group from the N-terminal  $\alpha$ -amine; a solution of a solution of phenol (0.0625 g), water (62.5  $\mu$ L), thioanisole (62.5  $\mu$ L), ethanedithiol (31  $\mu$ L) and triisopropylsilane (12.5  $\mu$ L) in trifluoroacetic acid (TFA, 1 mL) for cleaving the protein from resin and globally removing acid-labile side-chain protecting groups. Proteins were precipitated from the TFA solution by addition of diethyl ether (~40 mL). Following centrifugation, the ether was decanted, and the pellet was dissolved in ~40mL 1:1 H<sub>2</sub>O/MeCN, then flash frozen over dry ice in acetone and lyophilized to remove volatile impurities. The resulting powder was stored at -20°C until purification.

Proteins were purified by preparative reverse-phase high performance liquid chromatography (HPLC) on a C18 column using a linear gradient of water in acetonitrile with 0.1% v/v TFA. Fractions containing the desired protein product were pooled, frozen, and lyophilized. Proteins were identified by electrospray ionization time of flight mass spectrometry (ESI-TOF); expected and observed exact masses mass spectra appear in Table S1 and spectra appear in Figures S1–S41. Protein purity was assessed by Analytical HPLC (traces are shown in Figures S42–S86).

**Table S1.** Sequences for WW variants, along with expected and observed exact masses from ESI-TOF MS experiments.

| Peptide      | Sequence                                                                            | z | Expected<br>[M+z·H <sup>+</sup> ]/z | Observed<br>[M+ z·H <sup>+</sup> ]/z |
|--------------|-------------------------------------------------------------------------------------|---|-------------------------------------|--------------------------------------|
| <b>16Q</b>   | H <sub>2</sub> N-KLPPGW <del>Q</del> EKRMQRSSGRVYFNFHITNASQFERPSG-COOH              | 4 | 1006.76                             | 1006.74                              |
| <b>16Qp</b>  | H <sub>2</sub> N-KLPPGW <del>Q</del> EKRMQRSSGRVYFNFHITNASQFERPSG-COOH              | 4 | 1054.29                             | 1054.29                              |
| <b>16X</b>   | H <sub>2</sub> N-KLPPGW <del>X</del> EKRMXRSSGRVYFNFHITNASQFERPSG-COOH              | 3 | 1341.51                             | 1341.34                              |
| <b>16Xp</b>  | H <sub>2</sub> N-KLPPGW <del>X</del> EKRMXRSSGRVYFNFHITNASQFERPSG-COOH              | 3 | 1408.72                             | 1408.71                              |
| <b>16Z</b>   | H <sub>2</sub> N-KLPPGW <del>Z</del> EKRMZRSSGRVYFNFHITNASQFERPSG-COOH              | 4 | 1025.02                             | 1025.03                              |
| <b>16Zp</b>  | H <sub>2</sub> N-KLPPGW <del>Z</del> EKRMZRSSGRVYFNFHITNASQFERPSG-COOH              | 4 | 1083.30                             | 1083.30                              |
| <b>16Nbp</b> | H <sub>2</sub> N-KLPPGW <del>N</del> EKRMNRSSGRVYFNFHITNASQFERPSG-COOH              | 4 | 1098.32                             | 1098.31                              |
| <b>18Q</b>   | H <sub>2</sub> N-KLPPGW <del>Q</del> KRMSRQSGRVYFNFHITNASQFERPSG-COOH               | 4 | 1006.76                             | 1006.75                              |
| <b>18Qp</b>  | H <sub>2</sub> N-KLPPGW <del>Q</del> KRMSRQSGRVYFNFHITNASQFERPSG-COOH               | 4 | 1054.29                             | 1054.29                              |
| <b>18X</b>   | H <sub>2</sub> N-KLPPGW <del>X</del> KRMSR <del>X</del> SGRVYFNFHITNASQFERPSG-COOH  | 3 | 1341.34                             | 1341.33                              |
| <b>18Xp</b>  | H <sub>2</sub> N-KLPPGW <del>X</del> KRMSR <del>X</del> SGRVYFNFHITNASQFERPSG-COOH  | 3 | 1408.72                             | 1408.70                              |
| <b>18Z</b>   | H <sub>2</sub> N-KLPPGW <del>Z</del> KRMSRZSGRVYFNFHITNASQFERPSG-COOH               | 4 | 1025.02                             | 1025.00                              |
| <b>18Zp</b>  | H <sub>2</sub> N-KLPPGW <del>Z</del> KRMSRZSGRVYFNFHITNASQFERPSG-COOH               | 4 | 1083.30                             | 1083.30                              |
| <b>18Nbp</b> | H <sub>2</sub> N-KLPPGW <del>N</del> KRMSRNSGRVYFNFHITNASQFERPSG-COOH               | 4 | 1098.32                             | 1098.31                              |
| <b>23Q</b>   | H <sub>2</sub> N-KLPPGW <del>Q</del> KRMSRSQGRVYFNFHITNASQFERPSG-COOH               | 4 | 987.72                              | 987.75                               |
| <b>23Qp</b>  | H <sub>2</sub> N-KLPPGW <del>Q</del> KRMSRSQGRVYFNFHITNASQFERPSG-COOH               | 4 | 1035.28                             | 1035.28                              |
| <b>23X</b>   | H <sub>2</sub> N-KLPPGW <del>X</del> KRMSRS <del>X</del> GRVYFNFHITNASQFERPSG-COOH  | 3 | 1316.00                             | 1315.99                              |
| <b>23Xp</b>  | H <sub>2</sub> N-KLPPGW <del>X</del> KRMSRS <del>X</del> GRVYFNFHITNASQFERPSG-COOH  | 4 | 1037.78                             | 1037.78                              |
| <b>23Z</b>   | H <sub>2</sub> N-KLPPGW <del>Z</del> KRMSRSZGRVYFNFHITNASQFERPSG-COOH               | 4 | 1006.01                             | 1005.99                              |
| <b>23Zp</b>  | H <sub>2</sub> N-KLPPGW <del>Z</del> KRMSRSZGRVYFNFHITNASQFERPSG-COOH               | 4 | 1418.72                             | 1418.74                              |
| <b>23Nbp</b> | H <sub>2</sub> N-KLPPGW <del>N</del> KRMSRSN <del>N</del> GRVYFNFHITNASQFERPSG-COOH | 3 | 1438.74                             | 1438.77                              |
| <b>27Q</b>   | H <sub>2</sub> N-KLPPGW <del>Q</del> KRMSRSSGRVQYFNFHITNASQFERPSG-COOH              | 4 | 994.25                              | 994.25                               |
| <b>27Qp</b>  | H <sub>2</sub> N-KLPPGW <del>Q</del> KRMSRSSGRVQYFNFHITNASQFERPSG-COOH              | 4 | 1041.78                             | 1041.80                              |
| <b>27X</b>   | H <sub>2</sub> N-KLPPGW <del>X</del> KRMSRSSGRVXYFNFHITNASQFERPSG-COOH              | 4 | 993.75                              | 993.75                               |
| <b>27Xp</b>  | H <sub>2</sub> N-KLPPGW <del>X</del> KRMSRSSGRVXYFNFHITNASQFERPSG-COOH              | 4 | 1044.28                             | 1044.28                              |
| <b>27Z</b>   | H <sub>2</sub> N-KLPPGW <del>Z</del> KRMSRSSGRVZYFNFHITNASQFERPSG-COOH              | 4 | 1012.51                             | 1012.50                              |
| <b>27Zp</b>  | H <sub>2</sub> N-KLPPGW <del>Z</del> KRMSRSSGRVZYFNFHITNASQFERPSG-COOH              | 4 | 1070.79                             | 1070.78                              |
| <b>27Nbp</b> | H <sub>2</sub> N-KLPPGW <del>N</del> KRMSRSSGRVNYFNFHITNASQFERPSG-COOH              | 3 | 1447.41                             | 1447.44                              |
| <b>29Q</b>   | H <sub>2</sub> N-KLPPGW <del>Q</del> KRMSRSSGRVYFNQITNASQFERPSG-COOH                | 4 | 1003.26                             | 1003.25                              |
| <b>29Qp</b>  | H <sub>2</sub> N-KLPPGW <del>Q</del> KRMSRSSGRVYFNQITNASQFERPSG-COOH                | 4 | 1050.79                             | 1050.79                              |
| <b>29X</b>   | H <sub>2</sub> N-KLPPGW <del>X</del> KRMSRSSGRVYFNXI <del>X</del> ITNASQFERPSG-COOH | 3 | 1336.67                             | 1336.67                              |
| <b>29Xp</b>  | H <sub>2</sub> N-KLPPGW <del>X</del> KRMSRSSGRVYFNXI <del>X</del> ITNASQFERPSG-COOH | 3 | 1404.04                             | 1404.04                              |
| <b>29Z</b>   | H <sub>2</sub> N-KLPPGW <del>Z</del> KRMSRSSGRVYFNZI <del>Z</del> ITNASQFERPSG-COOH | 4 | 1021.51                             | 1021.52                              |
| <b>29Zp</b>  | H <sub>2</sub> N-KLPPGW <del>Z</del> KRMSRSSGRVYFNZI <del>Z</del> ITNASQFERPSG-COOH | 4 | 1079.80                             | 1079.82                              |
| <b>29Nbp</b> | H <sub>2</sub> N-KLPPGW <del>N</del> KRMSRSSGRVYFNNI <del>N</del> ITNASQFERPSG-COOH | 3 | 1459.41                             | 1459.42                              |
| <b>32Q</b>   | H <sub>2</sub> N-KLPPGW <del>Q</del> KRMSRSSGRVYFNHIQNASQFERPSG-COOH                | 4 | 1006.76                             | 1006.76                              |
| <b>32Qp</b>  | H <sub>2</sub> N-KLPPGW <del>Q</del> KRMSRSSGRVYFNHIQNASQFERPSG-COOH                | 4 | 1054.29                             | 1054.29                              |
| <b>32X</b>   | H <sub>2</sub> N-KLPPGW <del>X</del> KRMSRSSGRVYFNHIXNASQFERPSG-COOH                | 4 | 1006.26                             | 1006.25                              |
| <b>32Xp</b>  | H <sub>2</sub> N-KLPPGW <del>X</del> KRMSRSSGRVYFNHIXNASQFERPSG-COOH                | 3 | 1408.72                             | 1408.69                              |
| <b>32Z</b>   | H <sub>2</sub> N-KLPPGW <del>Z</del> KRMSRSSGRVYFNHIZNASQFERPSG-COOH                | 4 | 1025.02                             | 1025.03                              |
| <b>32Zp</b>  | H <sub>2</sub> N-KLPPGW <del>Z</del> KRMSRSSGRVYFNHIZNASQFERPSG-COOH                | 4 | 1083.30                             | 1083.30                              |
| <b>32Nbp</b> | H <sub>2</sub> N-KLPPGW <del>N</del> KRMSRSSGRVYFNHINNASQFERPSG-COOH                | 4 | 1098.32                             | 1098.31                              |

<sup>a</sup>**N** = Asn-PEG; **N** = Asn-branched PEG; **Q** = Gln-PEG; **X** = Aha; **X** = Aha-PEG; **Z** = PrF; **Z** = PrF-PEG.

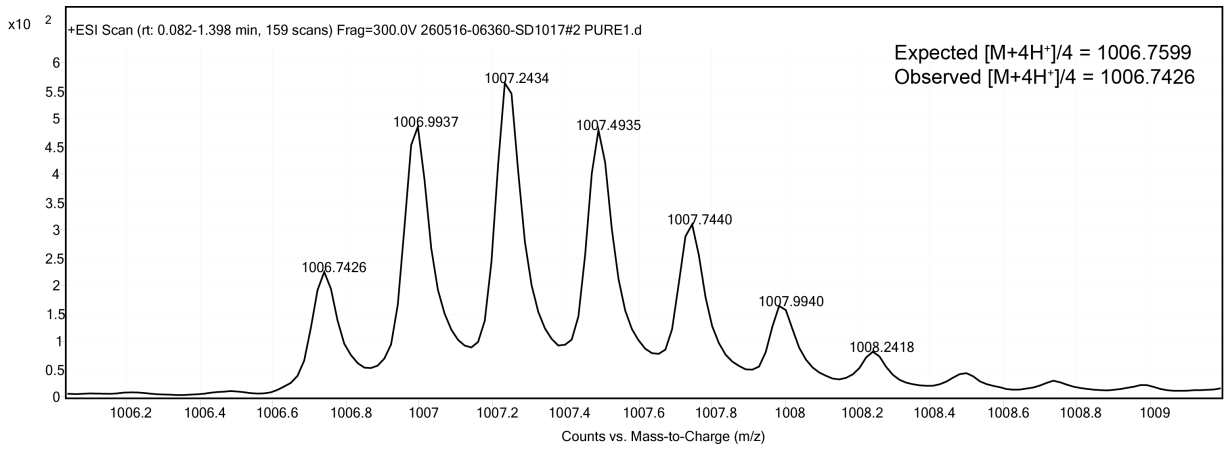

**Figure S1.** ESI-TOF spectrum for WW variant **16Q**.

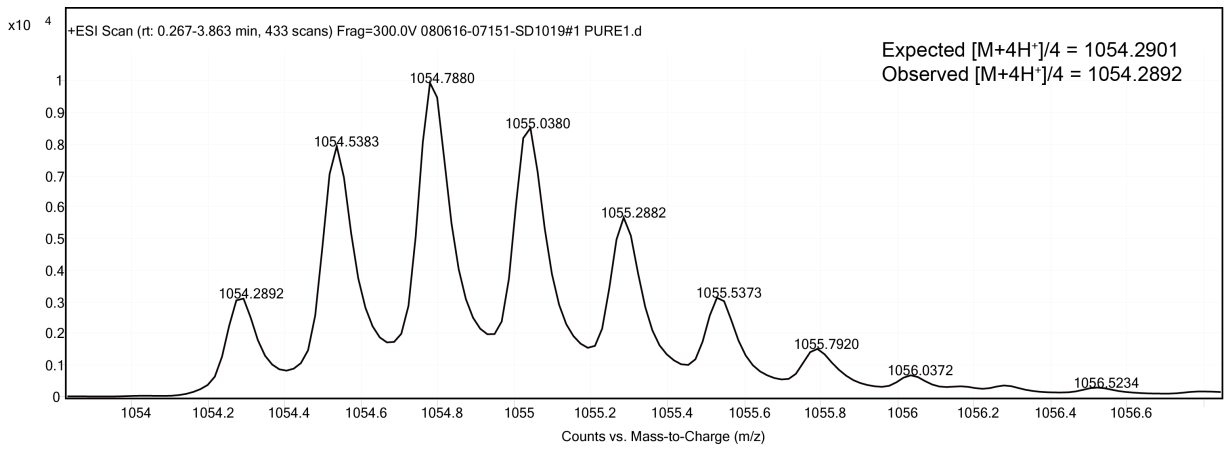

**Figure S2.** ESI-TOF spectrum for WW variant **16Qp**.

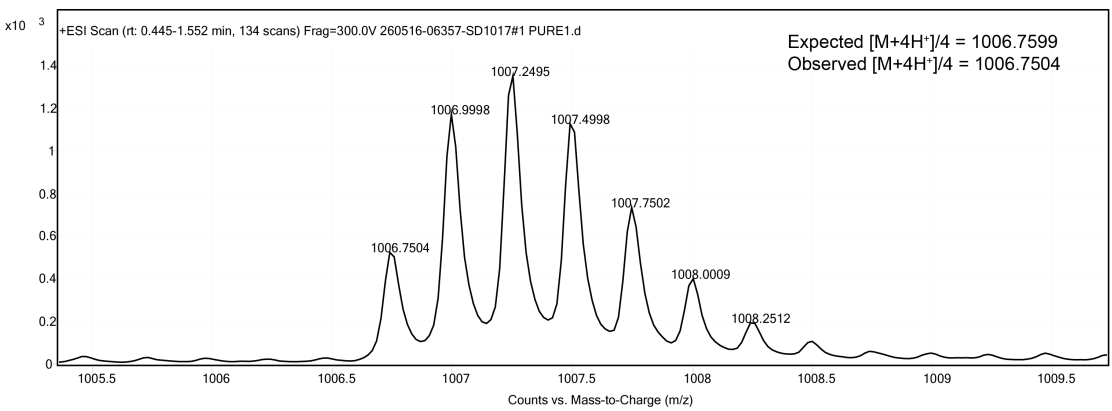

**Figure S3.** ESI-TOF spectrum for WW variant **18Q**.

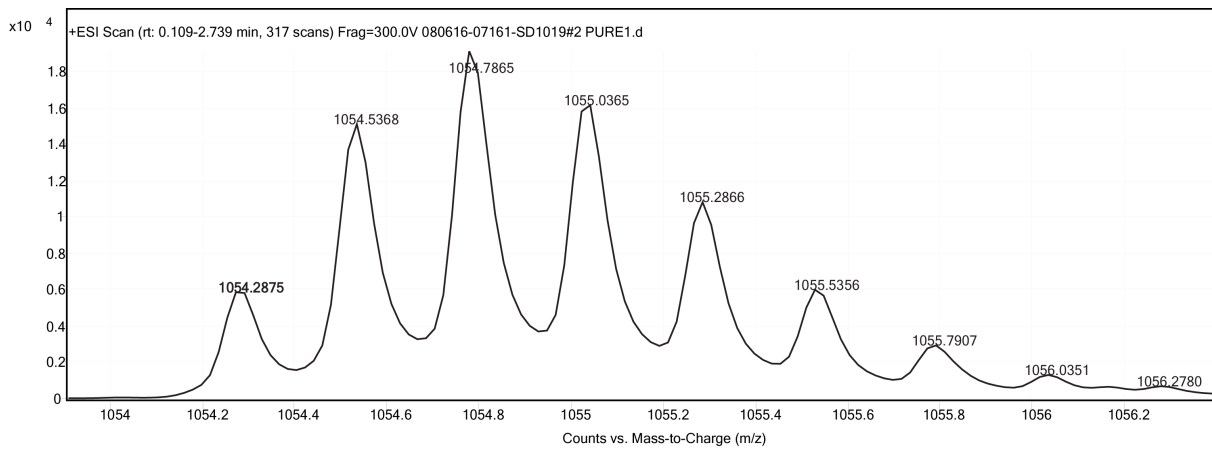

**Figure S4.** ESI-TOF spectrum for WW variant **18Qp**.

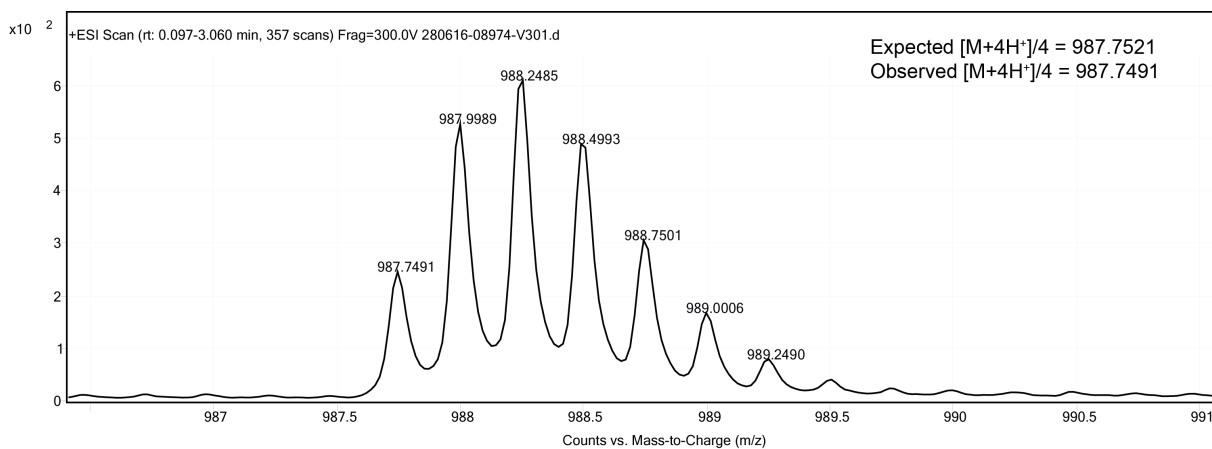

**Figure S5.** ESI-TOF spectrum for WW variant **23Q**.

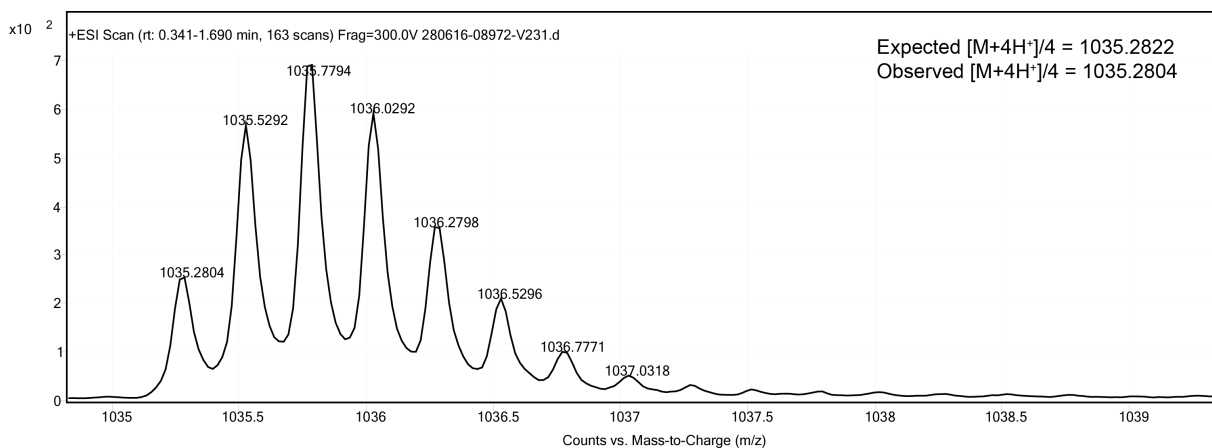

**Figure S6.** ESI-TOF spectrum for WW variant **23Qp**.

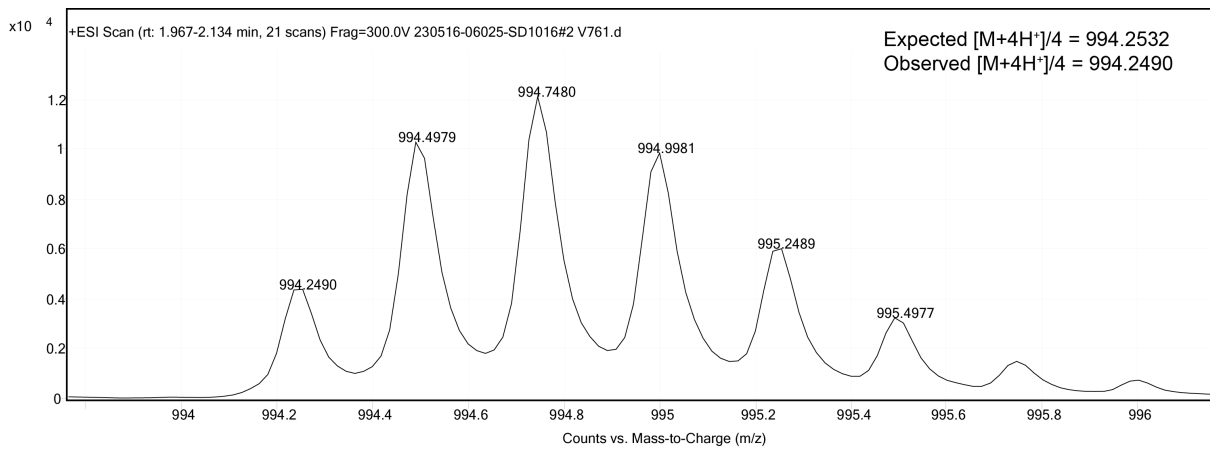

**Figure S7.** ESI-TOF spectrum for WW variant **27Q**.

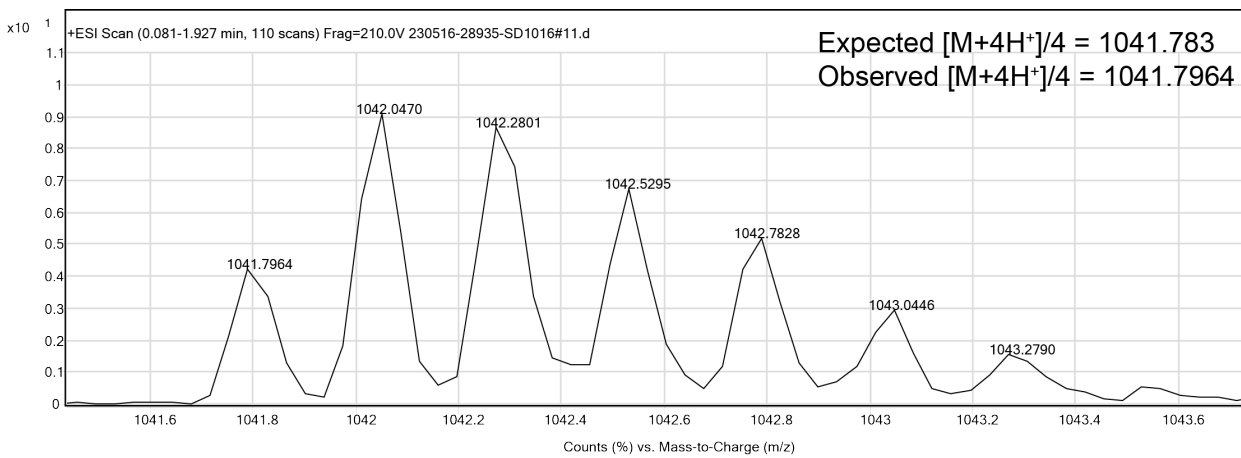

**Figure S8.** ESI-TOF spectrum for WW variant **27Qp**.

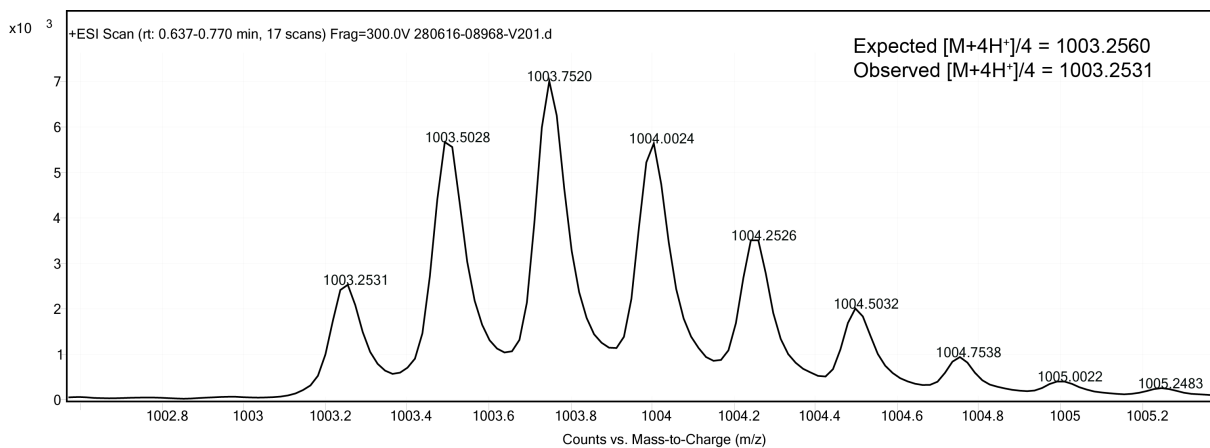

**Figure S9.** ESI-TOF spectrum for WW variant **29Q**.

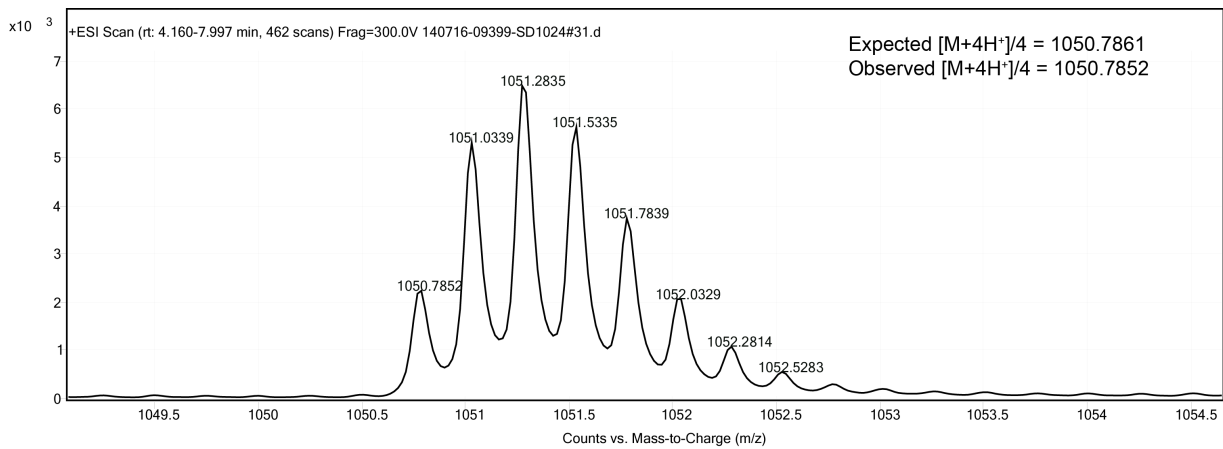

**Figure S10.** ESI-TOF spectrum for WW variant **29Qp**.

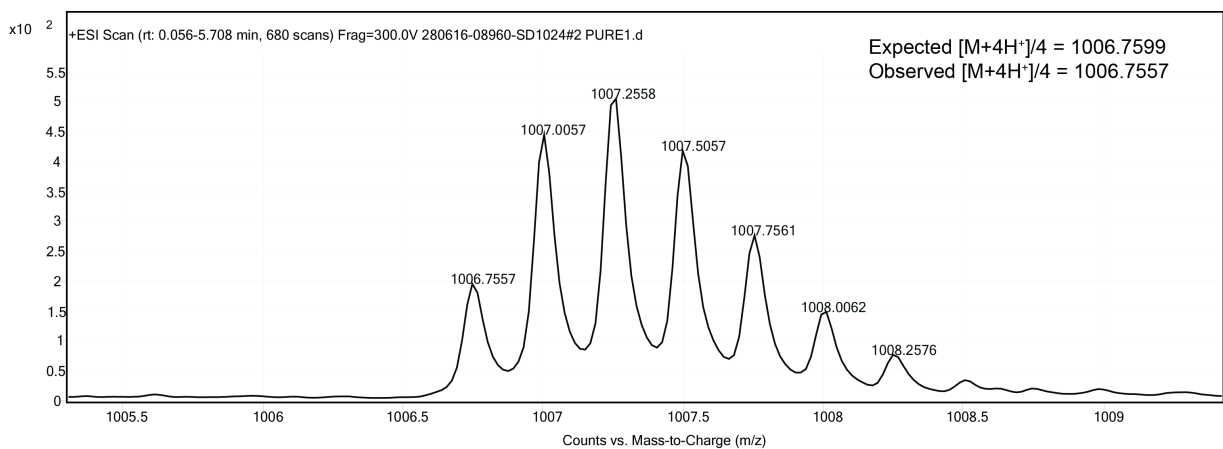

**Figure S11.** ESI-TOF spectrum for WW variant **32Q**.

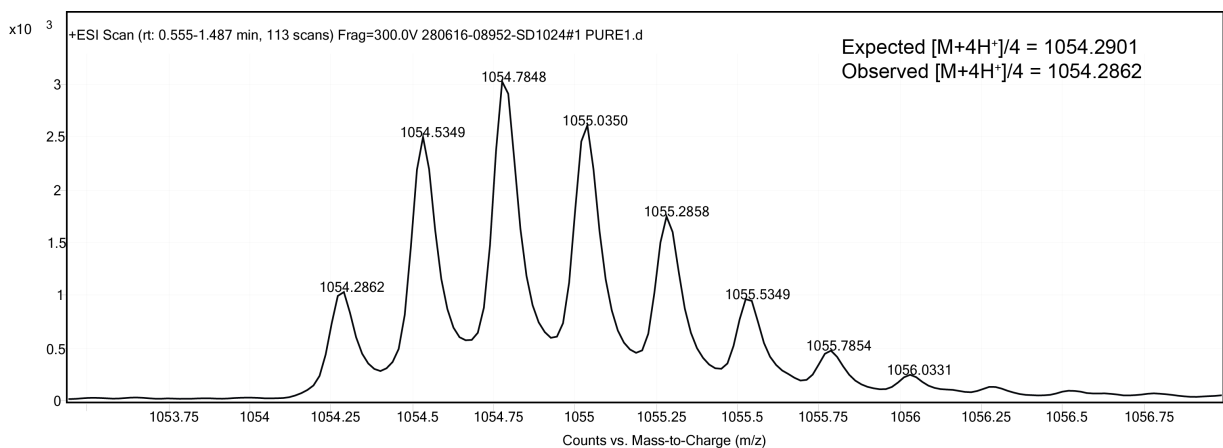

**Figure S12.** ESI-TOF spectrum for WW variant **32Qp**.

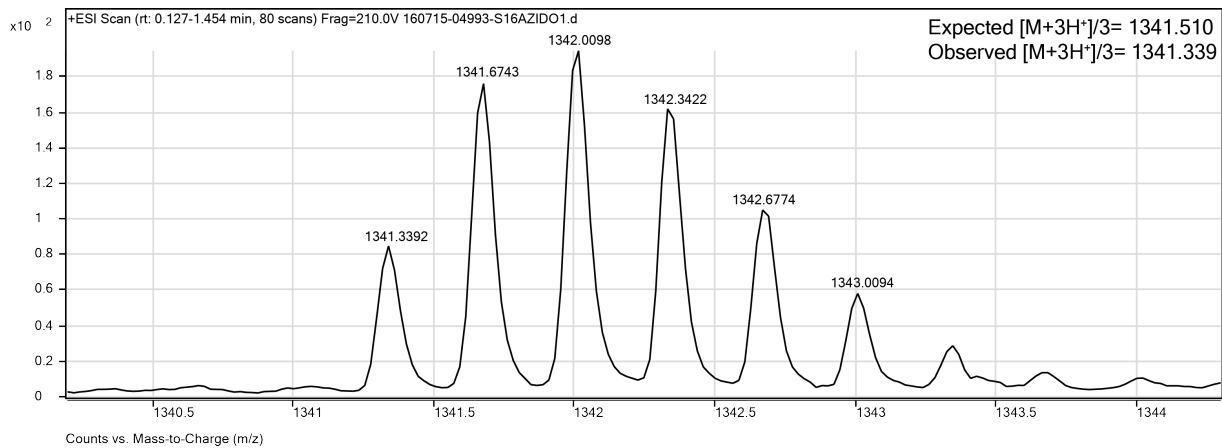

**Figure S13.** ESI-TOF spectrum for WW variant **16X**.

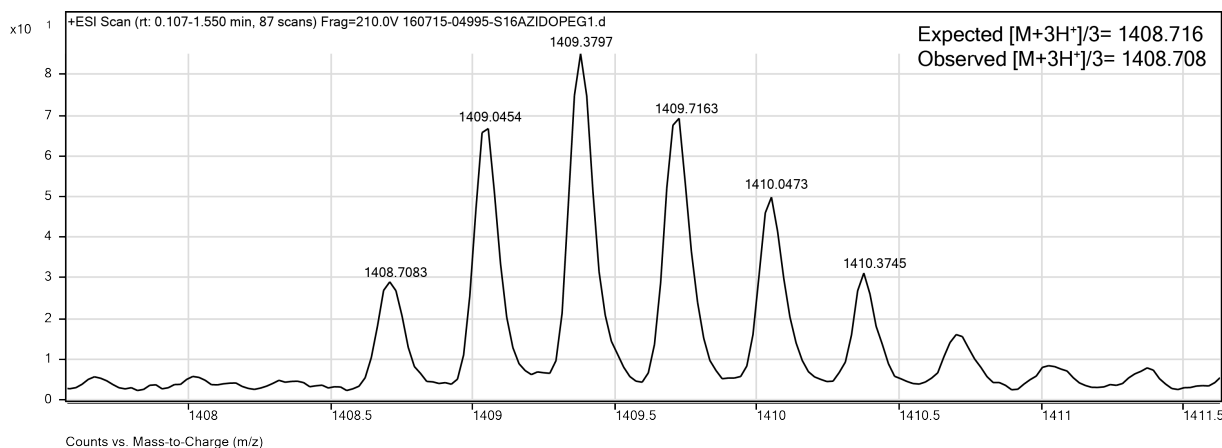

**Figure S14.** ESI-TOF spectrum for WW variant **16Xp**.

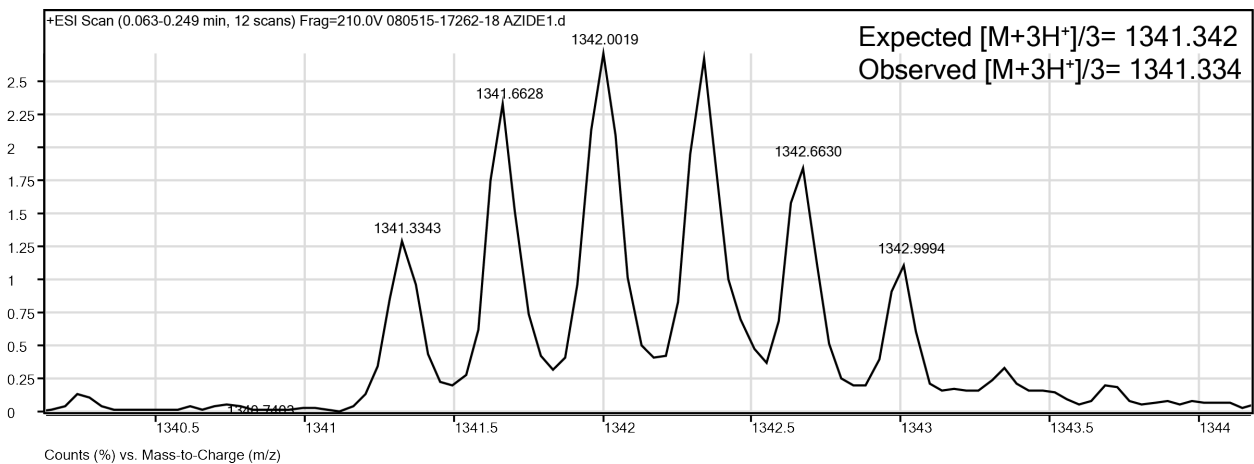

**Figure S15.** ESI-TOF spectrum for WW variant **18X**.



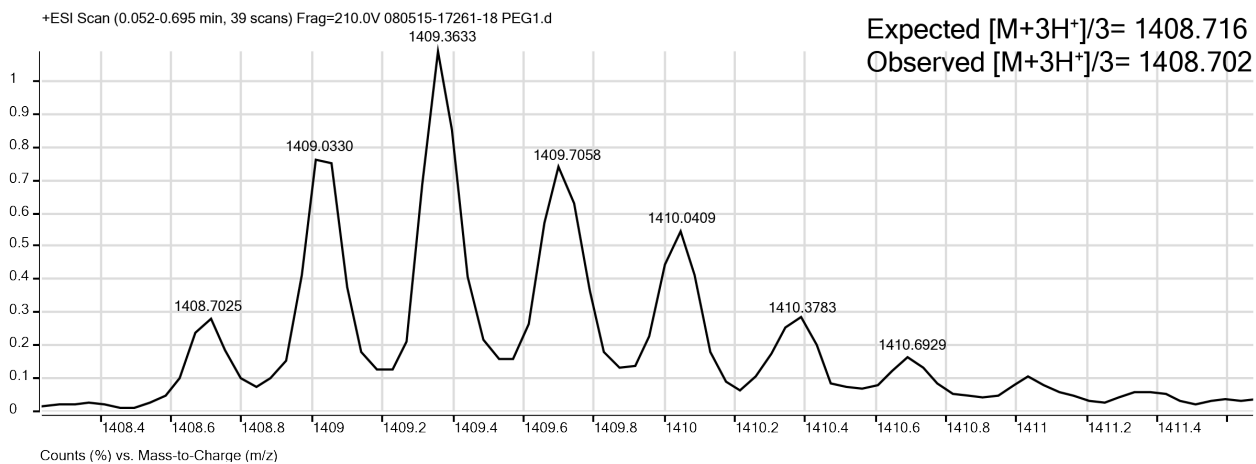

**Figure S16.** ESI-TOF spectrum for WW variant 18Xp.

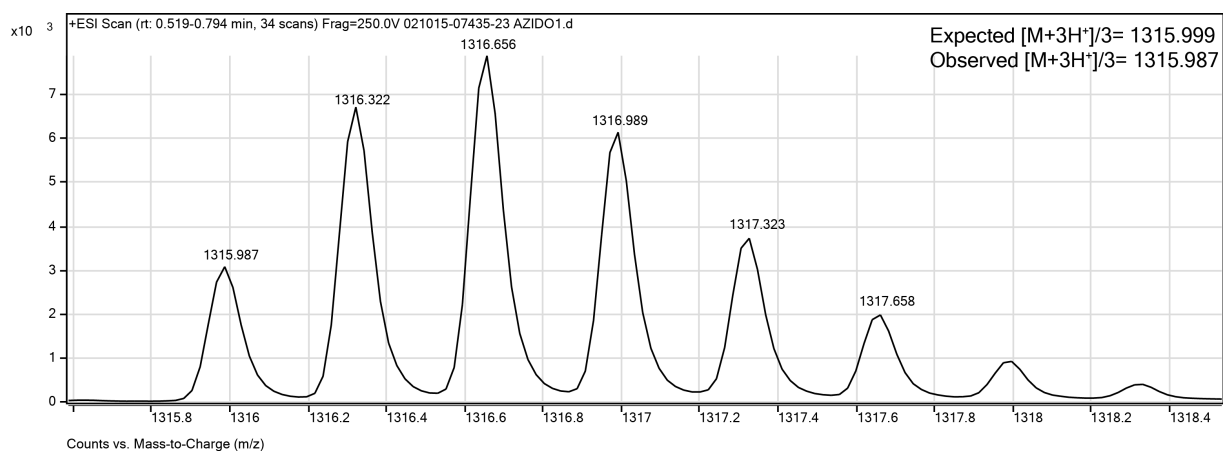

**Figure S17.** ESI-TOF spectrum for WW variant 23X.

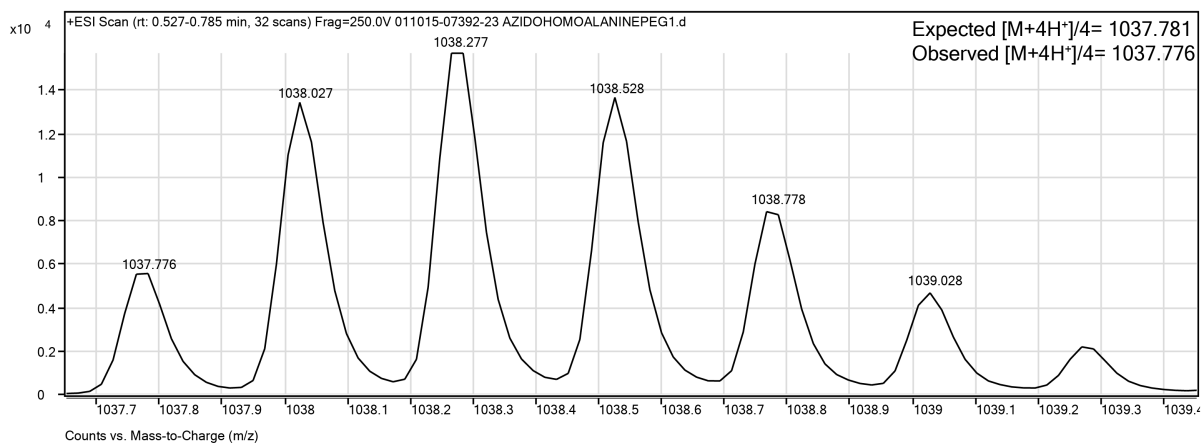

**Figure S18.** ESI-TOF spectrum for WW variant 23Xp.

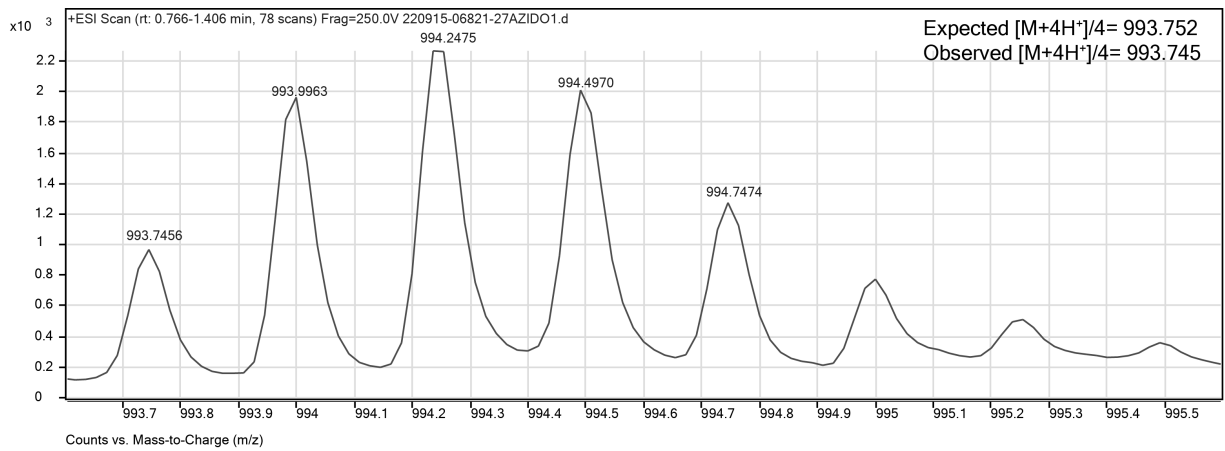

Figure S191. ESI-TOF spectrum for WW variant 27X.

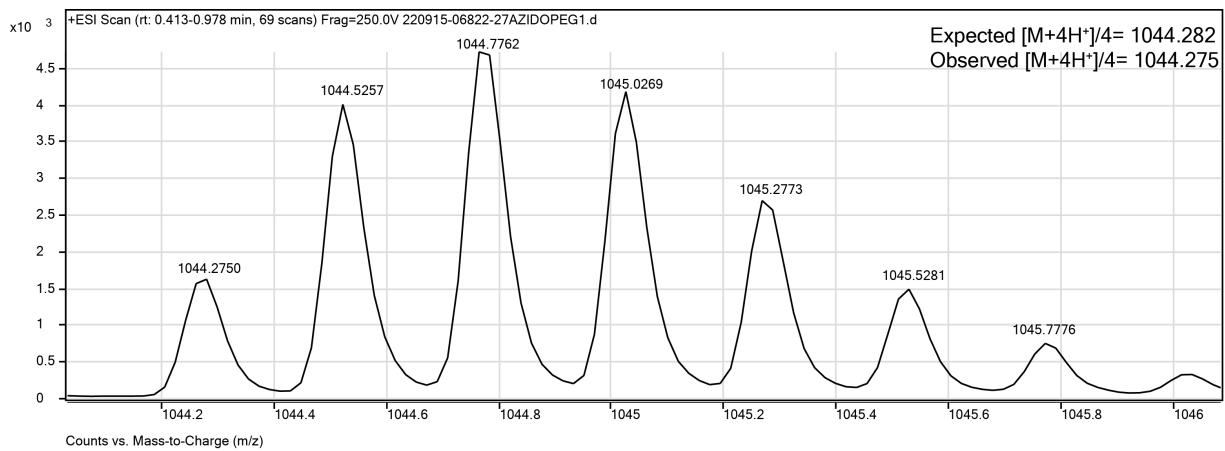

Figure S20. ESI-TOF spectrum for WW variant 27Xp.

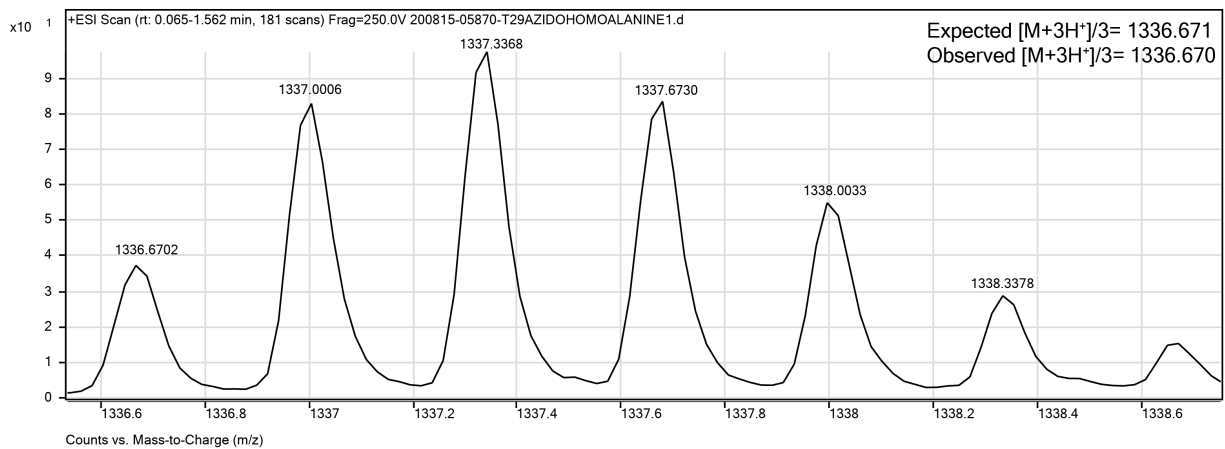

Figure S20. ESI-TOF spectrum for WW variant 29X.

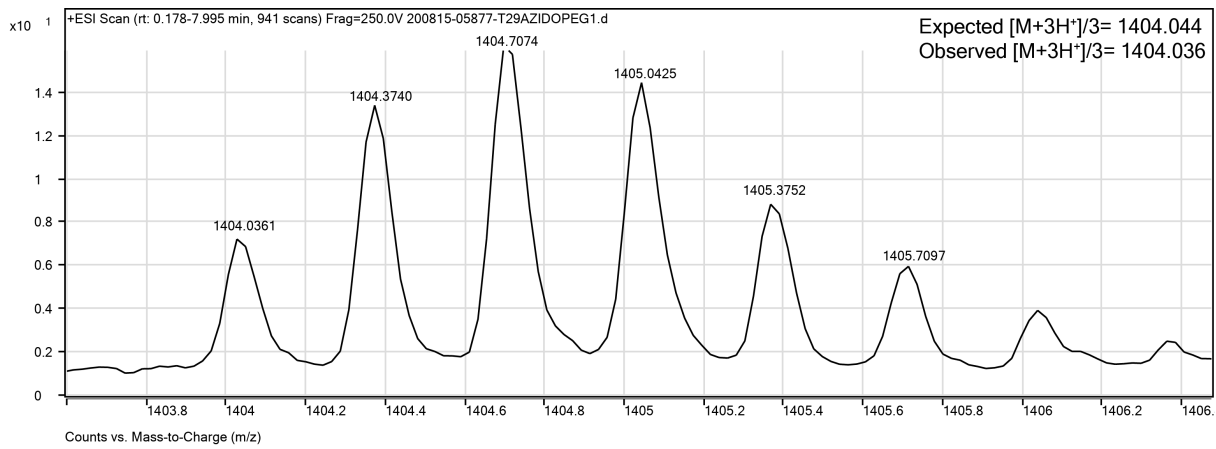

**Figure S21.** ESI-TOF spectrum for WW variant **29Xp**.

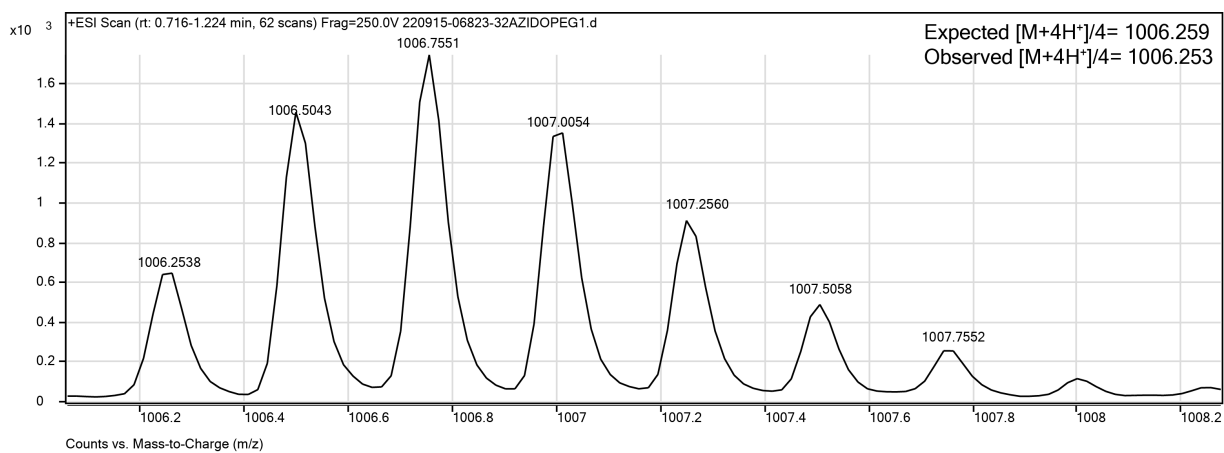

**Figure S22.** ESI-TOF spectrum for WW variant **32X**.

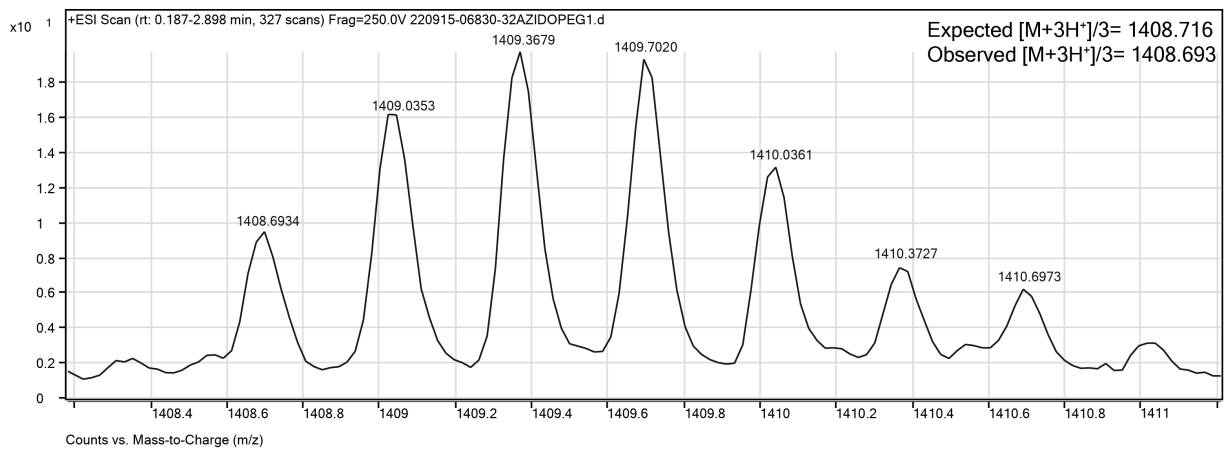

**Figure S23.** ESI-TOF spectrum for WW variant **32Xp**.

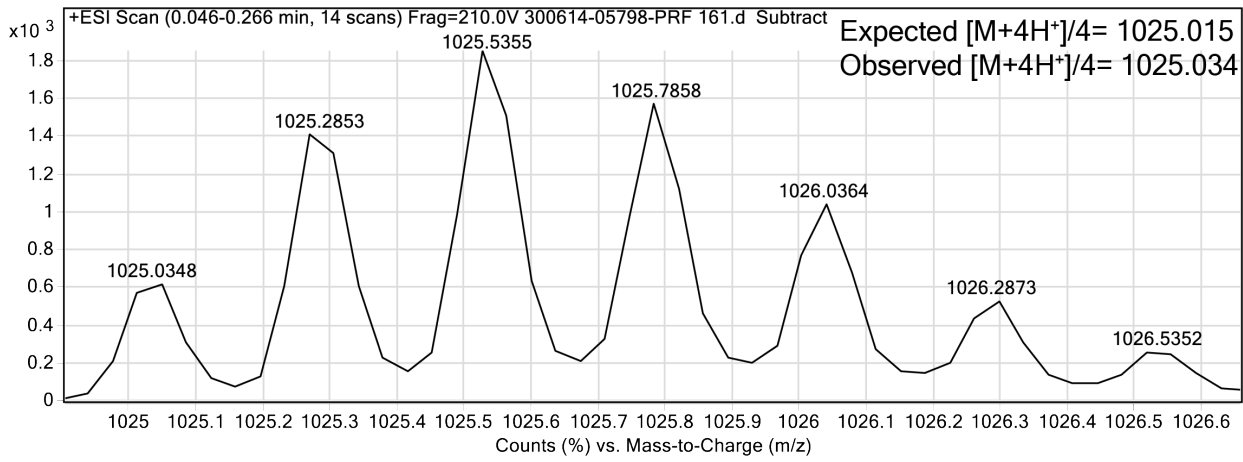

Figure S24. ESI-TOF spectrum for WW variant 16Z.

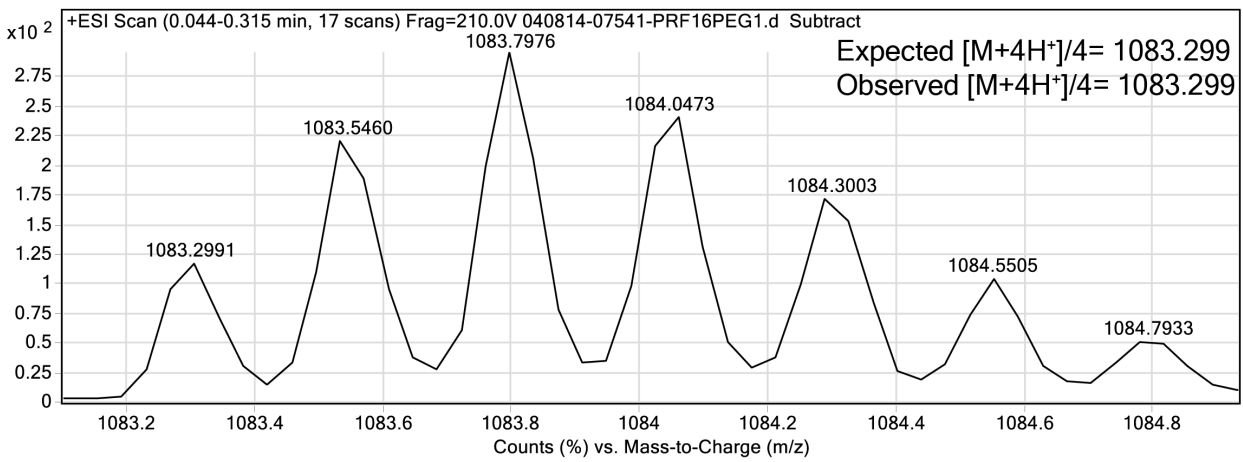

Figure S25. ESI-TOF spectrum for WW variant 16Zp.

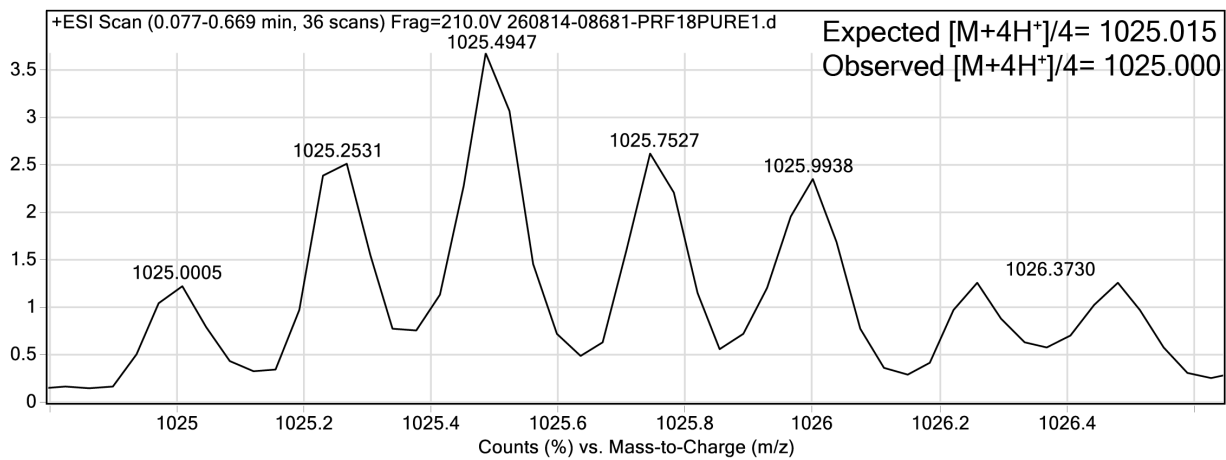

Figure S26. ESI-TOF spectrum for WW variant 18Z.

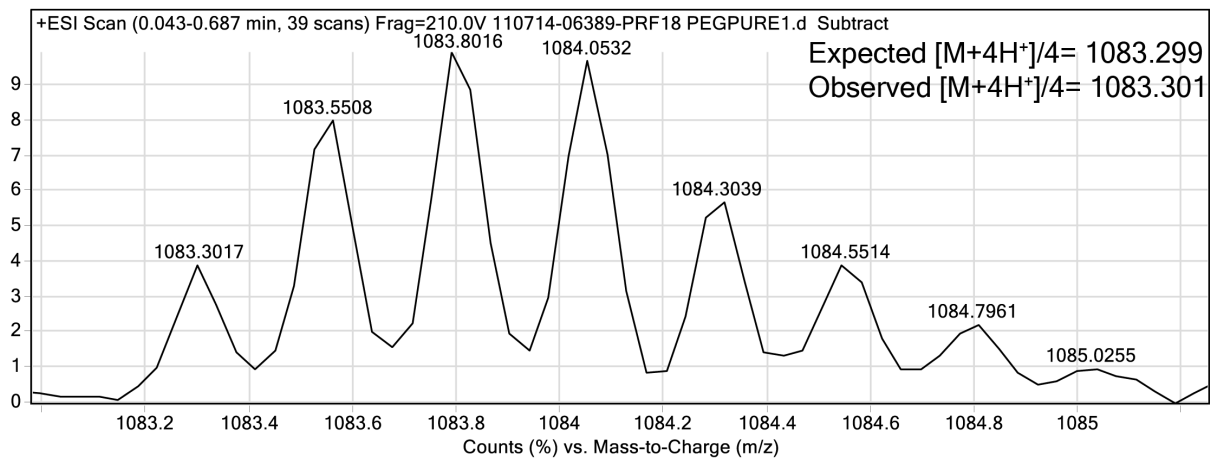

Figure S27. ESI-TOF spectrum for WW variant 18Zp.

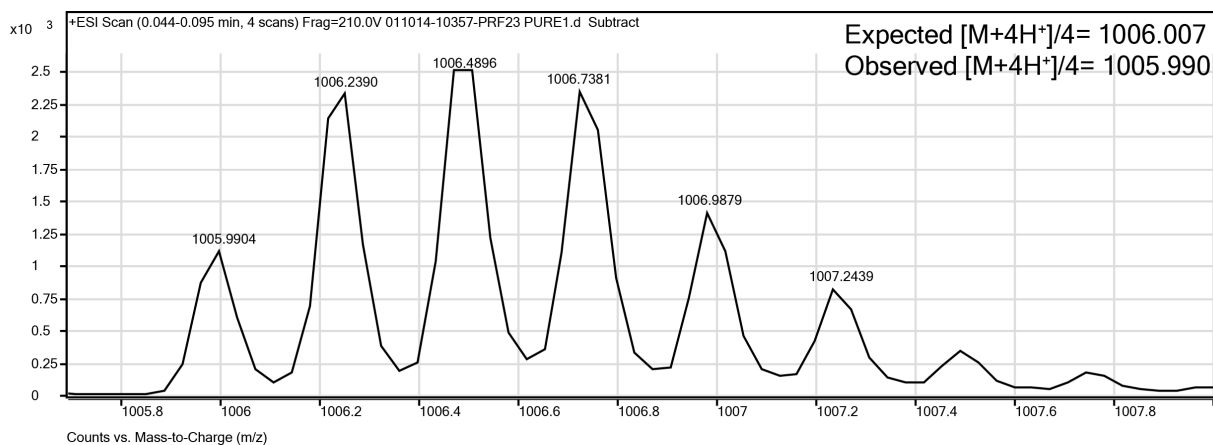

Figure S28. ESI-TOF spectrum for WW variant 23Z.

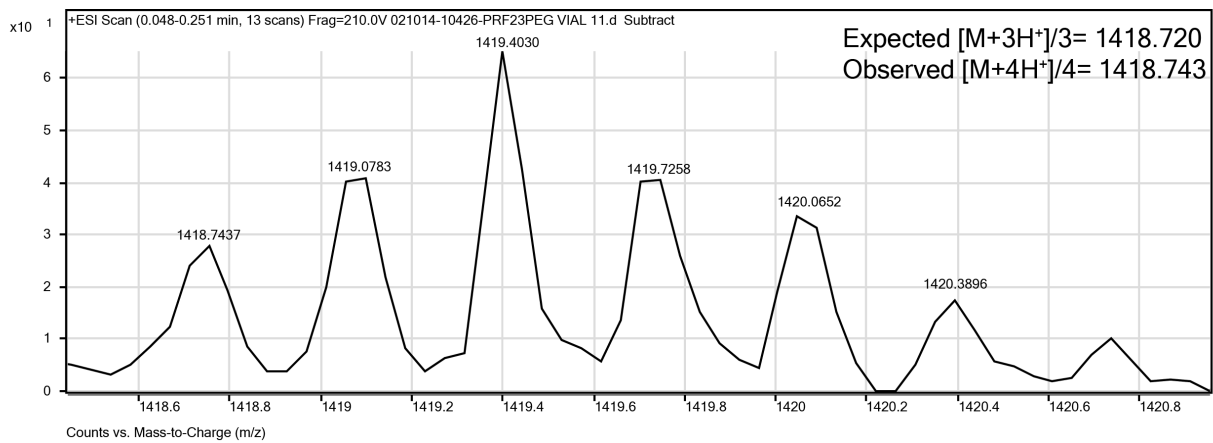

Figure S29. ESI-TOF spectrum for WW variant 23Zp.

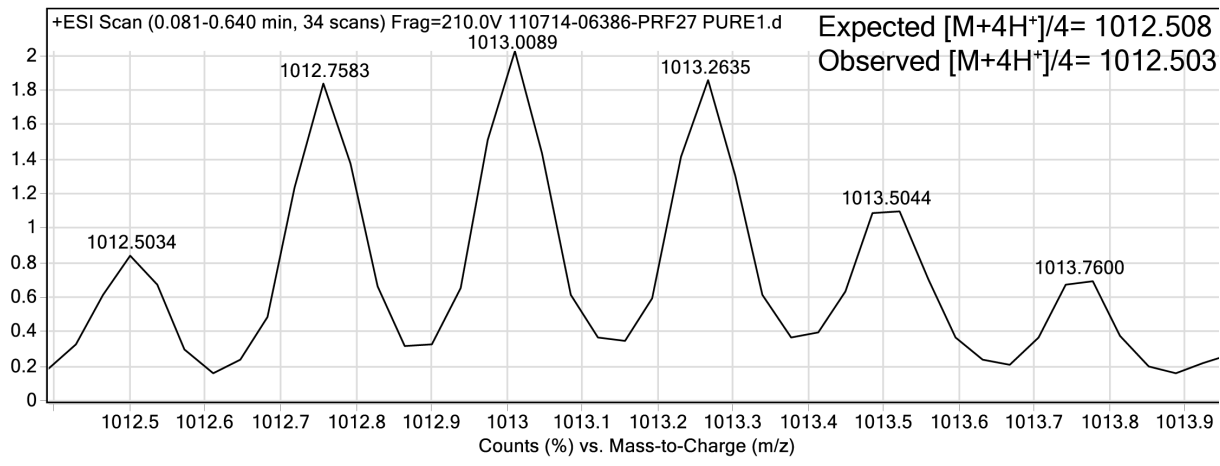

Figure S30. ESI-TOF spectrum for WW variant **27Z**.

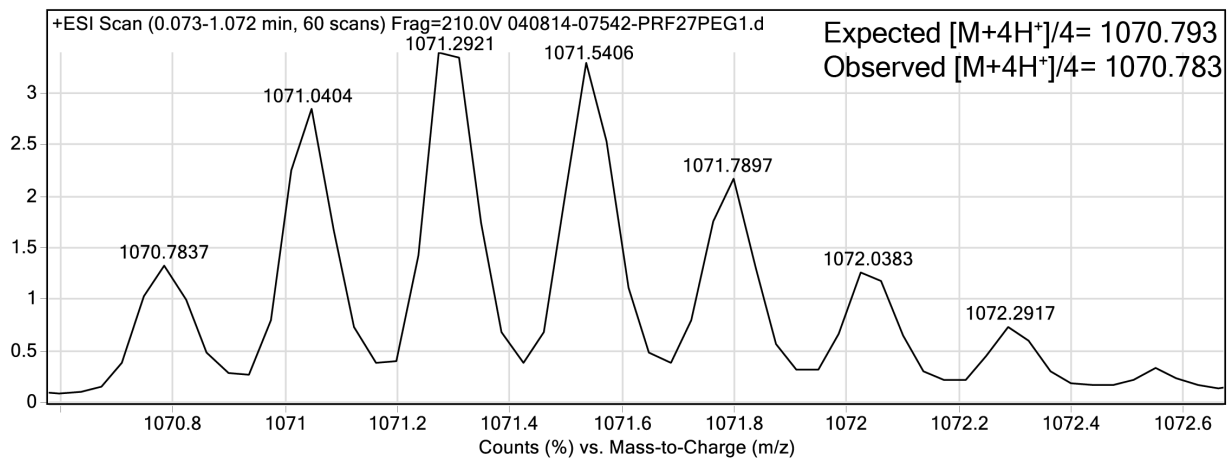

Figure S31. ESI-TOF spectrum for WW variant **27Zp**.

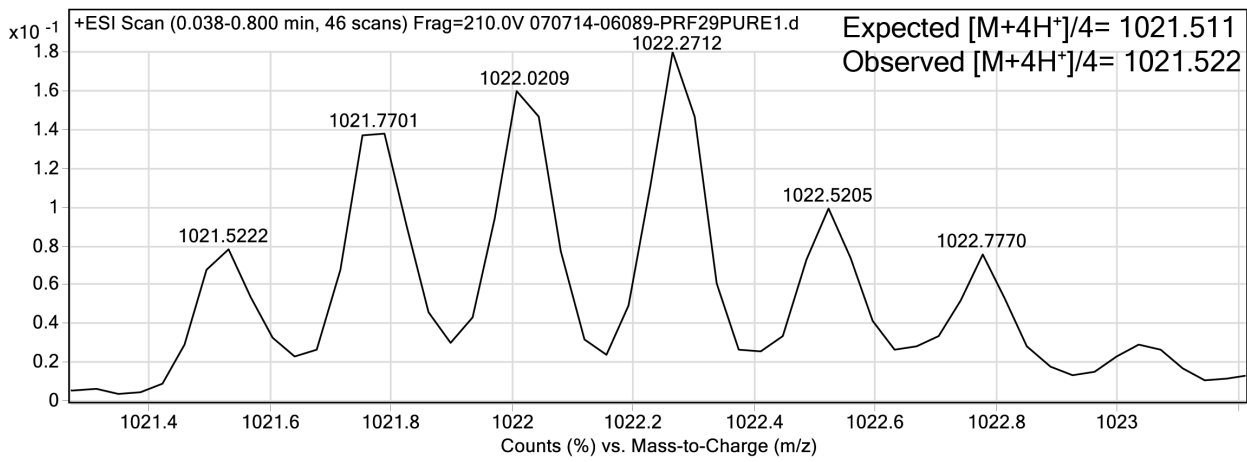

Figure S32. ESI-TOF spectrum for WW variant **29Z**.

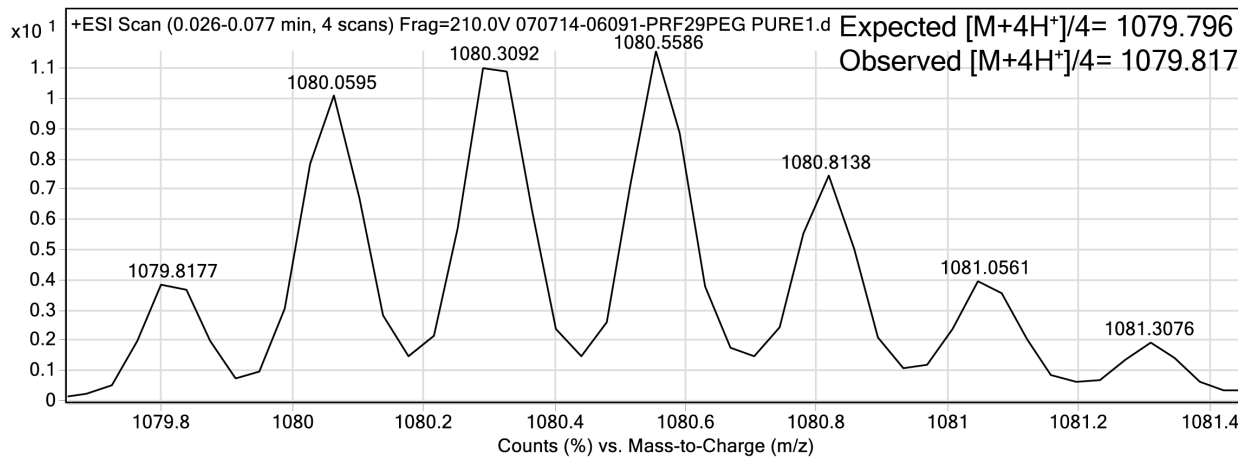

Figure S33. ESI-TOF spectrum for WW variant **29Zp**.

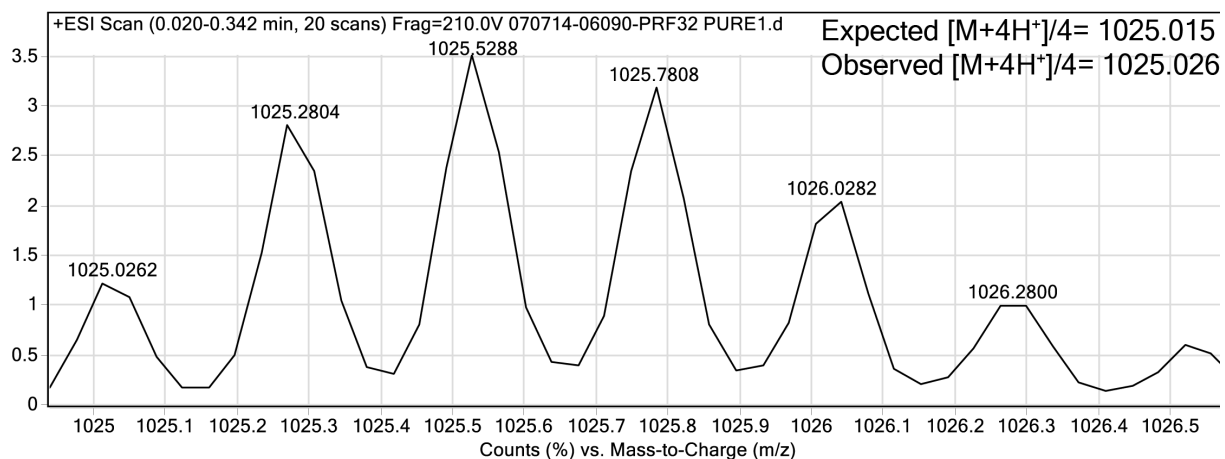

Figure S34. ESI-TOF spectrum for WW variant **32Z**.

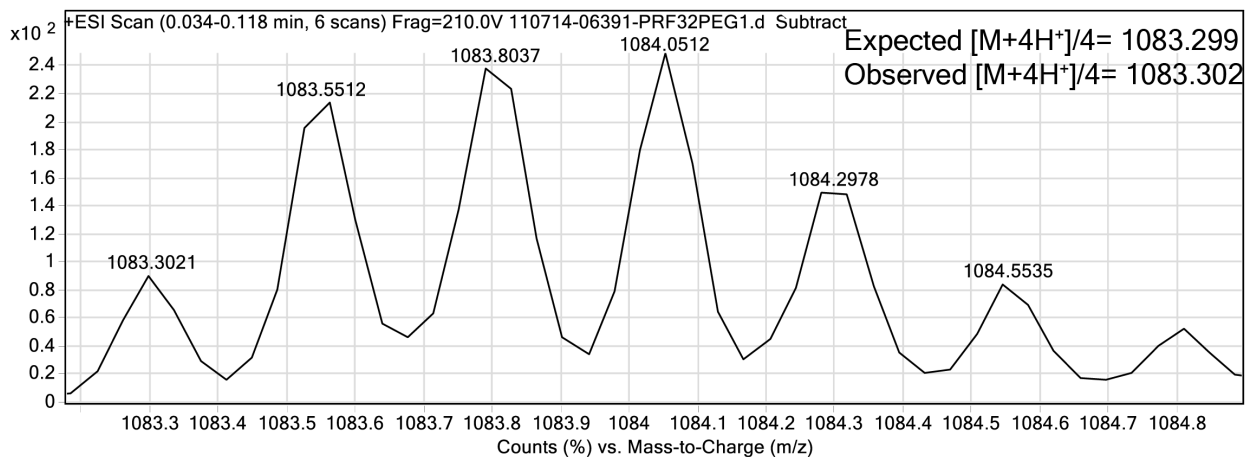

Figure S35. ESI-TOF spectrum for WW variant **32Zp**.

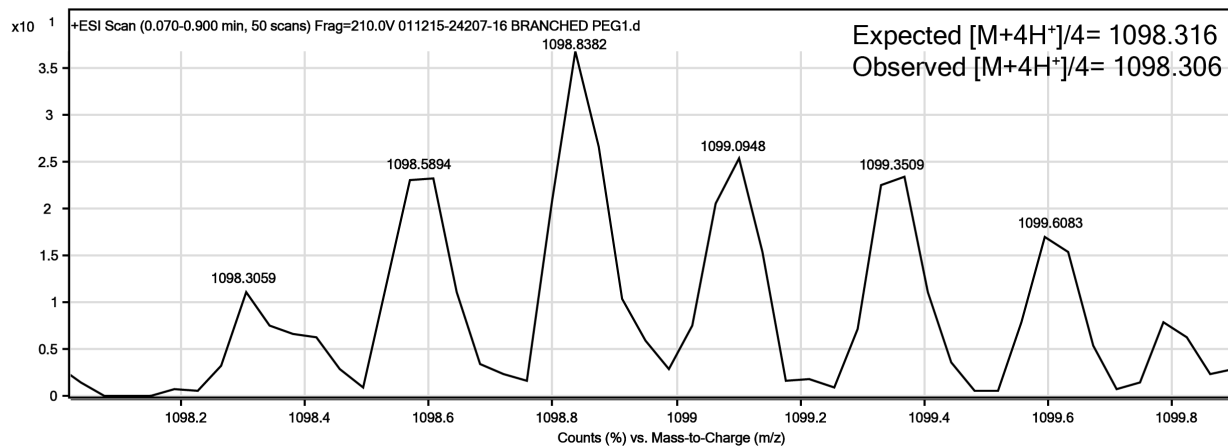

Figure S36. ESI-TOF spectrum for WW variant 16Nbp.

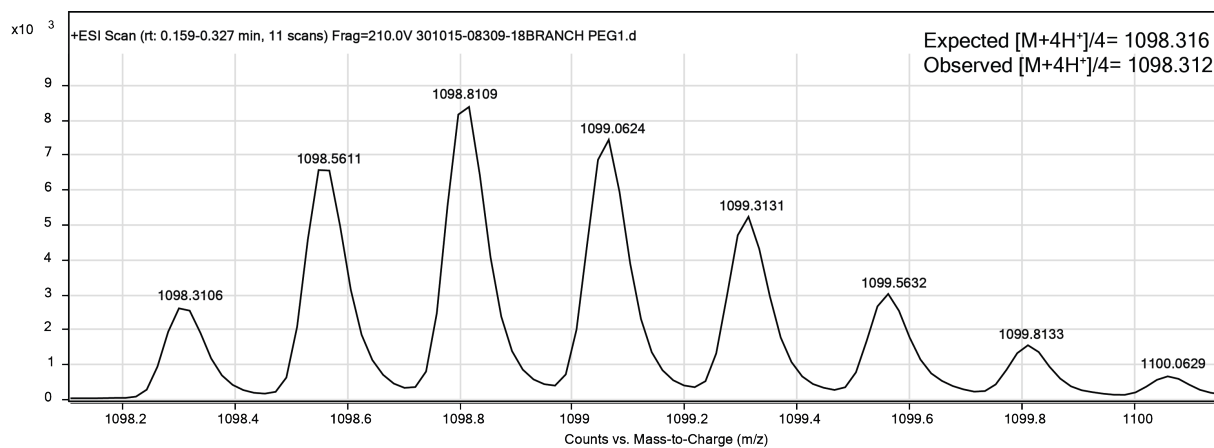

Figure S37. ESI-TOF spectrum for WW variant 18Nbp.

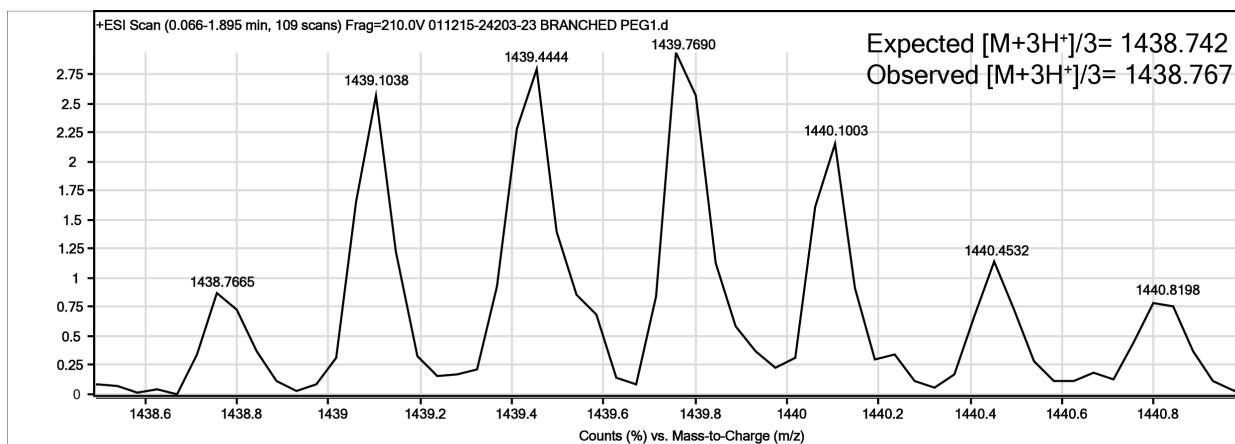

Figure S38. ESI-TOF spectrum for WW variant 23Nbp.



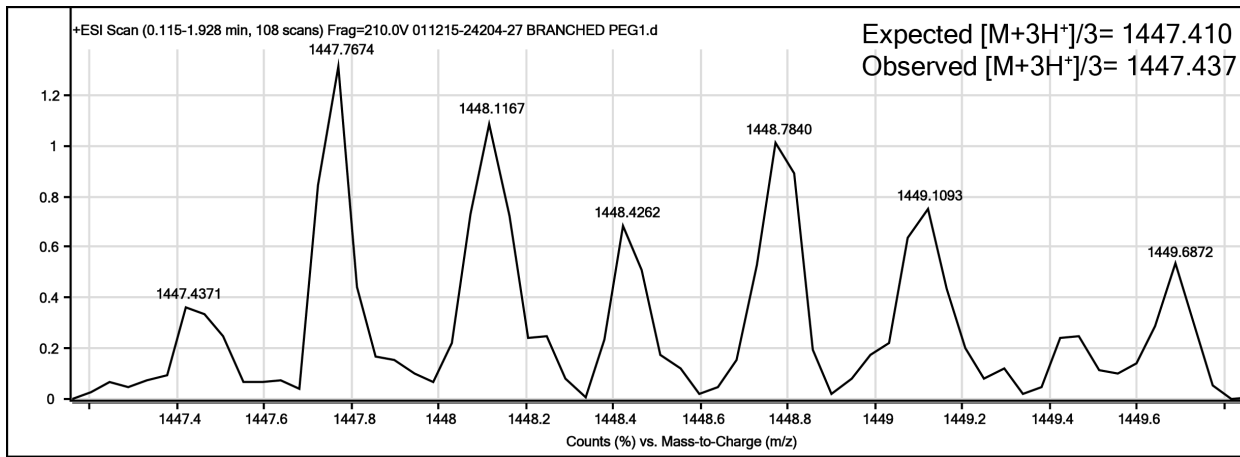

Figure S39. ESI-TOF spectrum for WW variant 27Nbp.

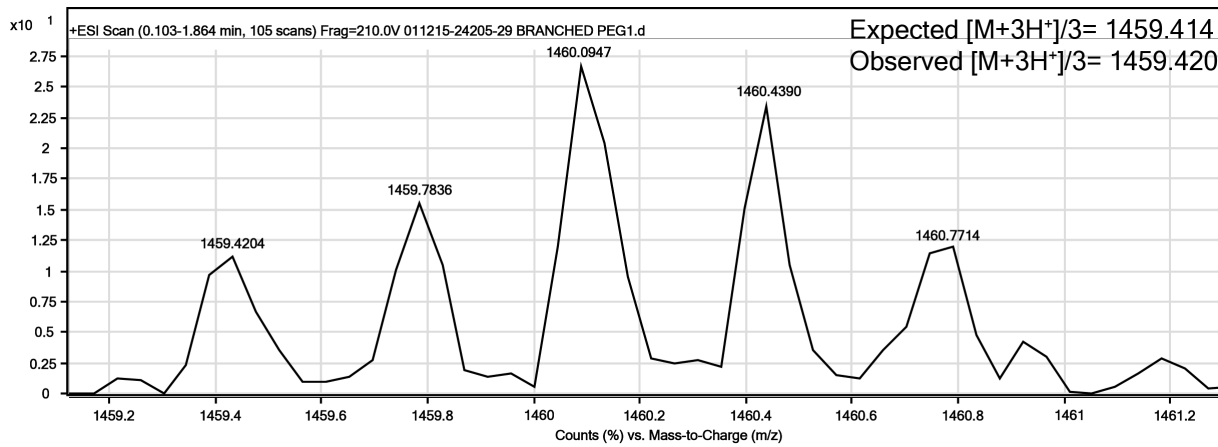

Figure S40. ESI-TOF spectrum for WW variant 29Nbp.

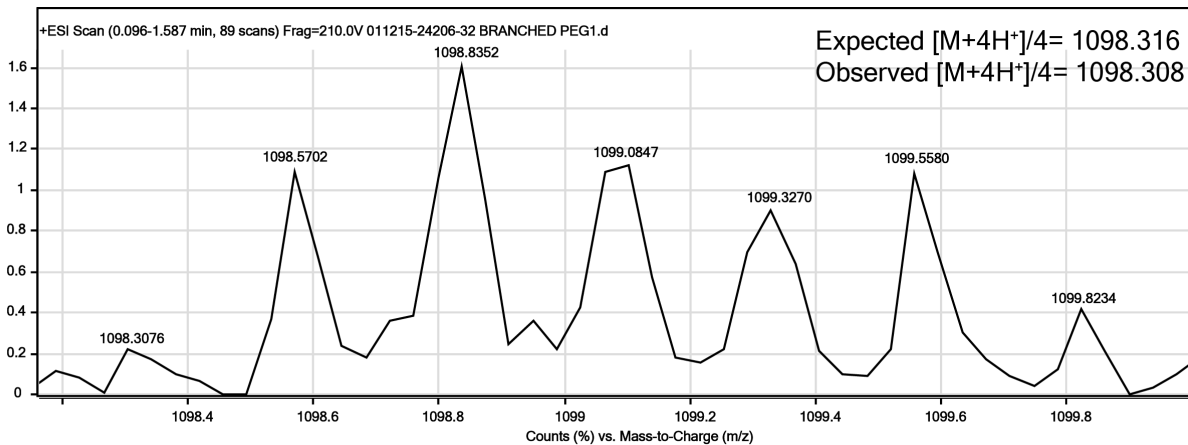

Figure S41. ESI-TOF spectrum for WW variant 32Nbp.

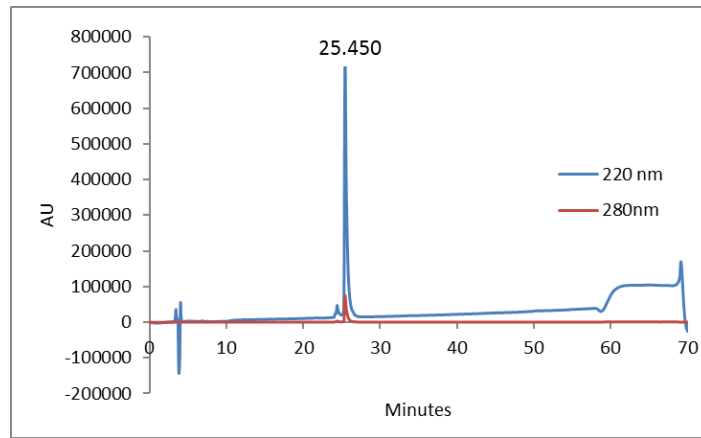

**Figure S42.** Analytical HPLC Data for WW variant **16Q**. Protein solution was injected onto a C18 analytical column and eluted using a linear gradient of 10-60% B (A=H<sub>2</sub>O, 0.1% TFA; B= MeCN, 0.1% TFA) over 50 minutes, followed by a 10 minute rinse (95% B), and a 10 minute column re-equilibration (10% B) with a flow rate of 1 mL/min.

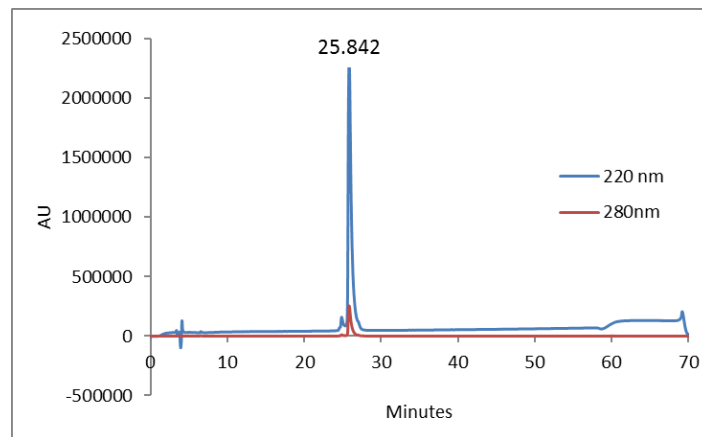

**Figure S43.** Analytical HPLC Data for WW variant **16Qp**. Protein solution was injected onto a C18 analytical column and eluted using a linear gradient of 10-60% B (A=H<sub>2</sub>O, 0.1% TFA; B= MeCN, 0.1% TFA) over 50 minutes, followed by a 10 minute rinse (95% B), and a 10 minute column re-equilibration (10% B) with a flow rate of 1 mL/min.

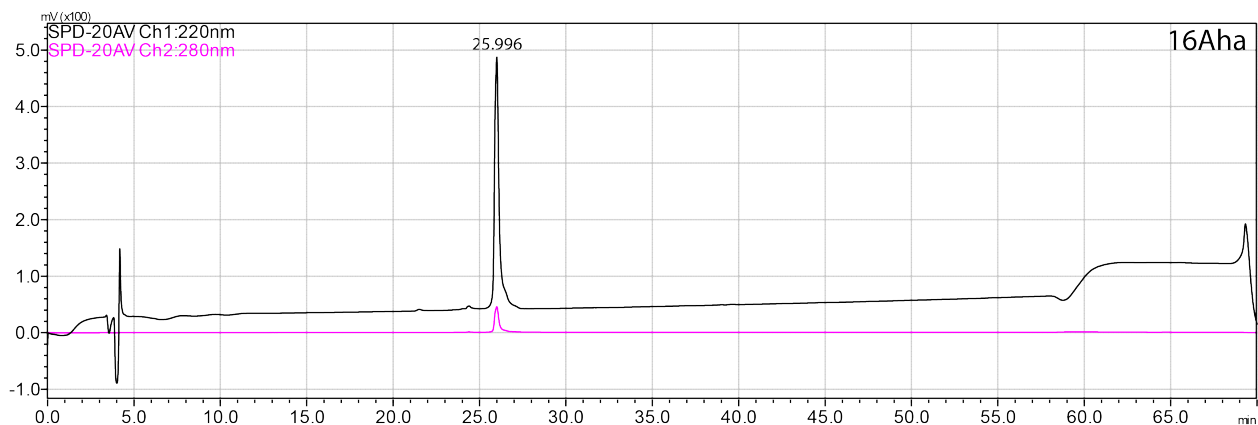

**Figure S44.** Analytical HPLC Data for WW variant **16X**. Protein solution was injected onto a C18 analytical column and eluted using a linear gradient of 10-60% B (A=H<sub>2</sub>O, 0.1% TFA; B= MeCN, 0.1% TFA) over 50 minutes, followed by a 10 minute rinse (95% B), and a 10 minute column re-equilibration (10% B) with a flow rate of 1 mL/min.

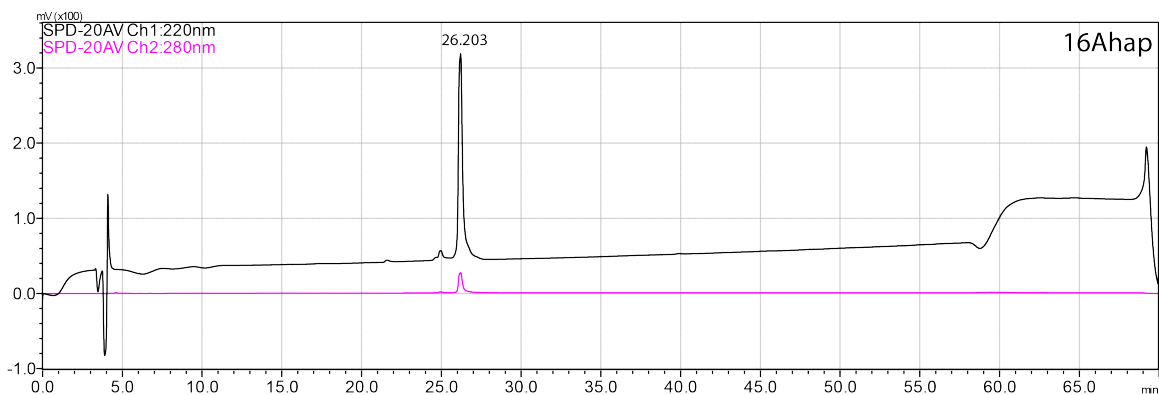

**Figure S45.** Analytical HPLC Data for WW variant **16Xp**. Protein solution was injected onto a C18 analytical column and eluted using a linear gradient of 10-60% B (A=H<sub>2</sub>O, 0.1% TFA; B= MeCN, 0.1% TFA) over 50 minutes, followed by a 10 minute rinse (95% B), and a 10 minute column re-equilibration (10% B) with a flow rate of 1 mL/min.

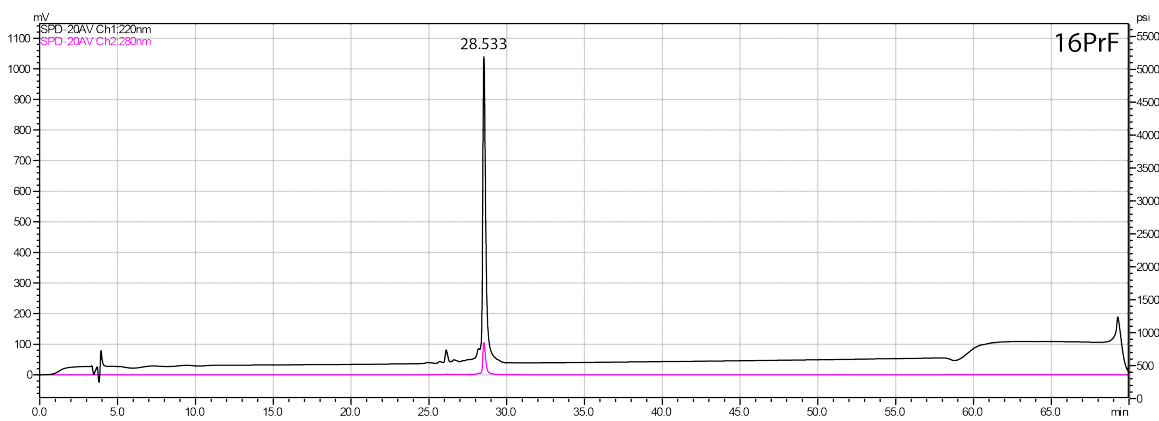

**Figure S46.** Analytical HPLC Data for WW variant **16Z**. Protein solution was injected onto a C18 analytical column and eluted using a linear gradient of 10-60% B (A=H<sub>2</sub>O, 0.1% TFA; B= MeCN, 0.1% TFA) over 50 minutes, followed by a 10 minute rinse (95% B), and a 10 minute column re-equilibration (10% B) with a flow rate of 1 mL/min

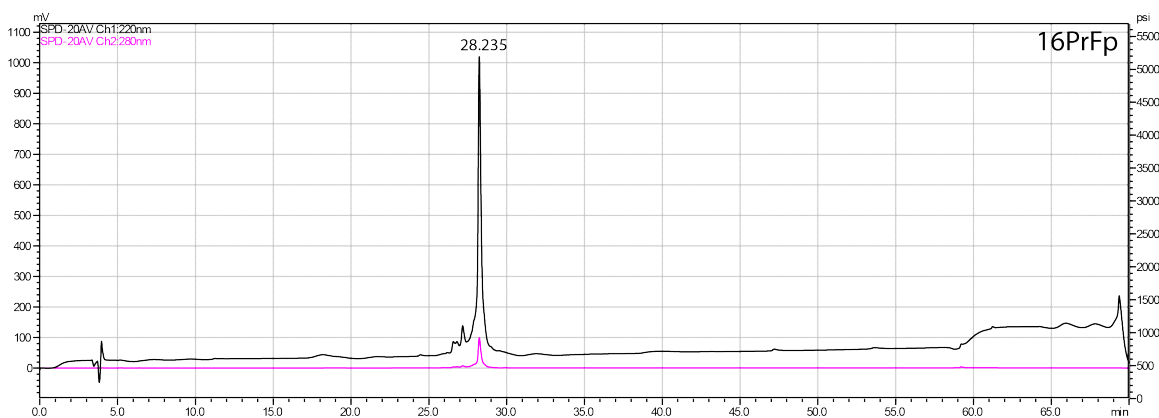

**Figure S47.** Analytical HPLC Data for WW variant **16Zp**. Protein solution was injected onto a C18 analytical column and eluted using a linear gradient of 10-60% B (A=H<sub>2</sub>O, 0.1% TFA; B= MeCN, 0.1% TFA) over 50 minutes, followed by a 10 minute rinse (95% B), and a 10 minute column re-equilibration (10% B) with a flow rate of 1 mL/min.

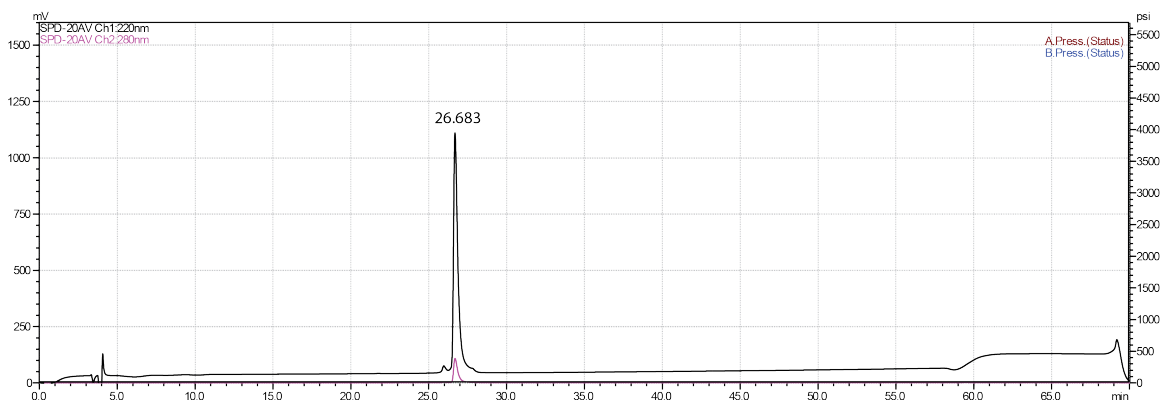

**Figure S48.** Analytical HPLC Data for WW variant **16Nbp**. Protein solution was injected onto a C18 analytical column and eluted using a linear gradient of 10-60% B (A=H<sub>2</sub>O, 0.1% TFA; B= MeCN, 0.1% TFA) over 50 minutes, followed by a 10 minute rinse (95% B), and a 10 minute column re-equilibration (10% B) with a flow rate of 1 mL/min.

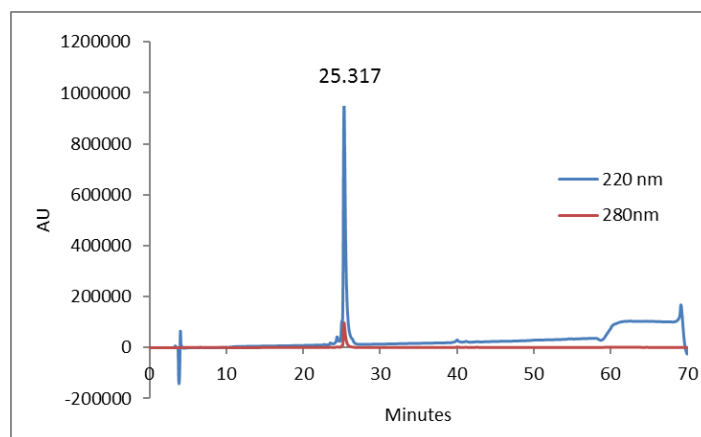

**Figure S49.** Analytical HPLC Data for WW variant **18Q**. Protein solution was injected onto a C18 analytical column and eluted using a linear gradient of 10-60% B (A=H<sub>2</sub>O, 0.1% TFA; B= MeCN, 0.1% TFA) over 50 minutes, followed by a 10 minute rinse (95% B), and a 10 minute column re-equilibration (10% B) with a flow rate of 1 mL/min.

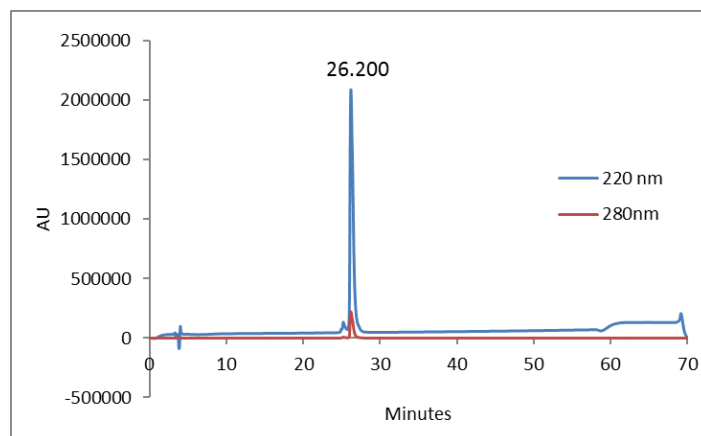

**Figure S50.** Analytical HPLC Data for WW variant **18Qp**. Protein solution was injected onto a C18 analytical column and eluted using a linear gradient of 10-60% B (A=H<sub>2</sub>O, 0.1% TFA; B= MeCN, 0.1% TFA) over 50 minutes, followed by a 10 minute rinse (95% B), and a 10 minute column re-equilibration (10% B) with a flow rate of 1 mL/min.

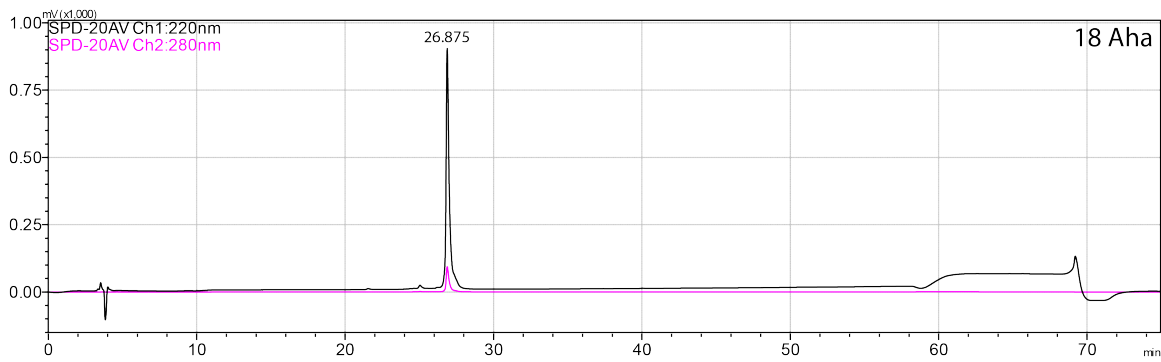

**Figure S51.** Analytical HPLC Data for WW variant **18X**. Protein solution was injected onto a C18 analytical column and eluted using a linear gradient of 10-60% B (A=H<sub>2</sub>O, 0.1% TFA; B= MeCN, 0.1% TFA) over 50 minutes, followed by a 10 minute rinse (95% B), and a 10 minute column re-equilibration (10% B) with a flow rate of 1 mL/min.

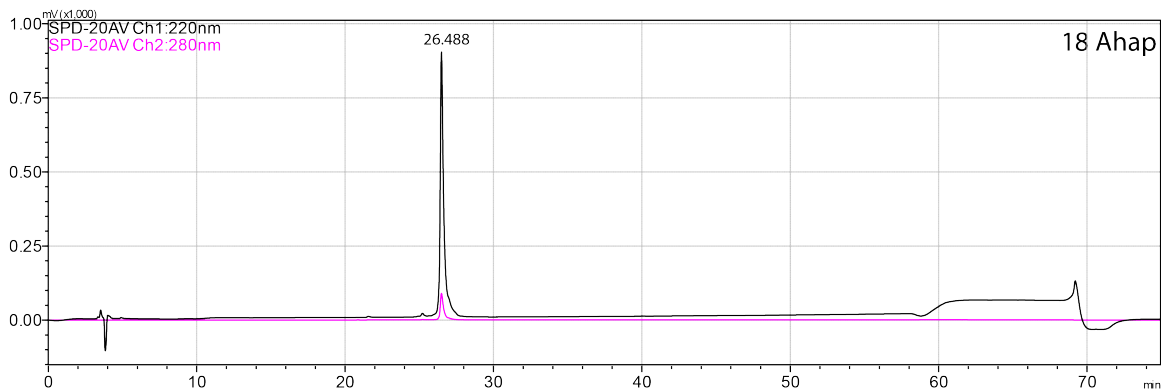

**Figure S52.** Analytical HPLC Data for WW variant **18Xp**. Protein solution was injected onto a C18 analytical column and eluted using a linear gradient of 10-60% B (A=H<sub>2</sub>O, 0.1% TFA; B= MeCN, 0.1% TFA) over 50 minutes, followed by a 10 minute rinse (95% B), and a 10 minute column re-equilibration (10% B) with a flow rate of 1 mL/min.

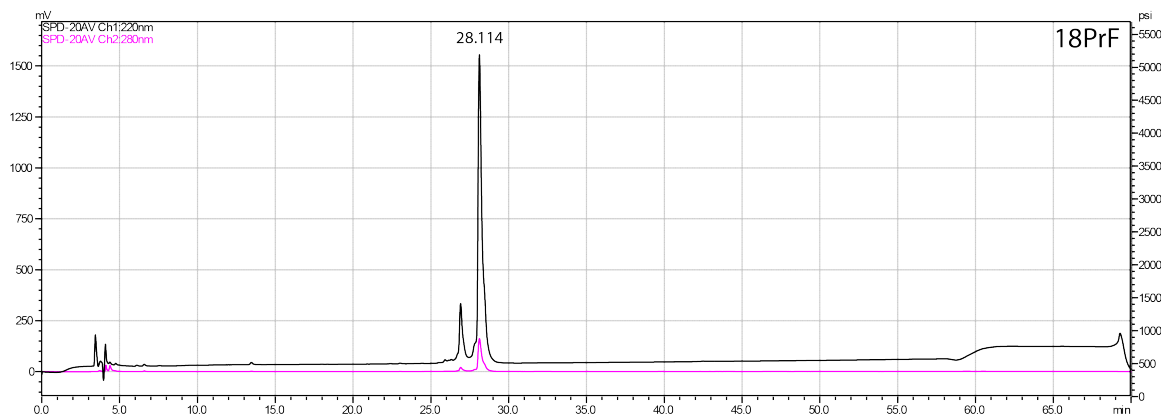

**Figure S53.** Analytical HPLC Data for WW variant **18Z**. Protein solution was injected onto a C18 analytical column and eluted using a linear gradient of 10-60% B (A=H<sub>2</sub>O, 0.1% TFA; B= MeCN, 0.1% TFA) over 50 minutes, followed by a 10 minute rinse (95% B), and a 10 minute column re-equilibration (10% B) with a flow rate of 1 mL/min.

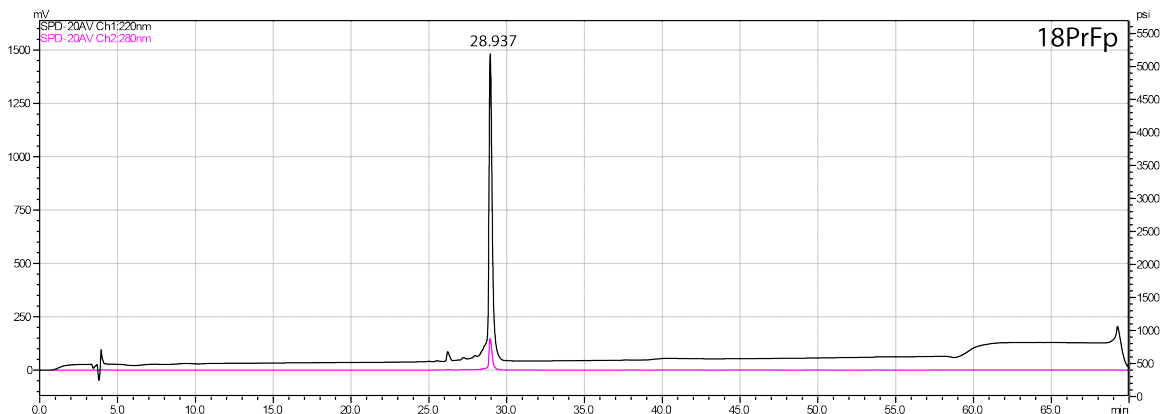

**Figure S54.** Analytical HPLC Data for WW variant **18Zp**. Protein solution was injected onto a C18 analytical column and eluted using a linear gradient of 10-60% B (A=H<sub>2</sub>O, 0.1% TFA; B= MeCN, 0.1% TFA) over 50 minutes, followed by a 10 minute rinse (95% B), and a 10 minute column re-equilibration (10% B) with a flow rate of 1 mL/min.

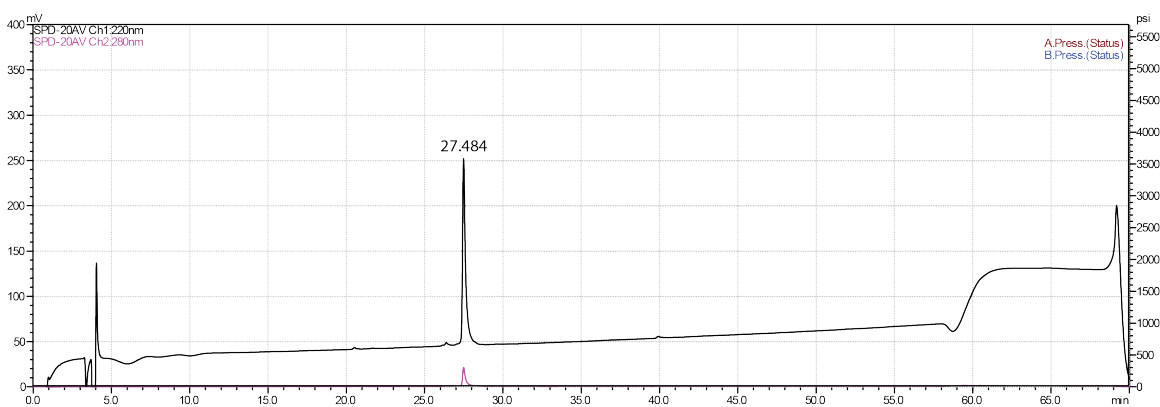

**Figure S55.** Analytical HPLC Data for WW variant **18Nbp**. Protein solution was injected onto a C18 analytical column and eluted using a linear gradient of 10-60% B (A=H<sub>2</sub>O, 0.1% TFA; B= MeCN, 0.1% TFA) over 50 minutes, followed by a 10 minute rinse (95% B), and a 10 minute column re-equilibration (10% B) with a flow rate of 1 mL/min.

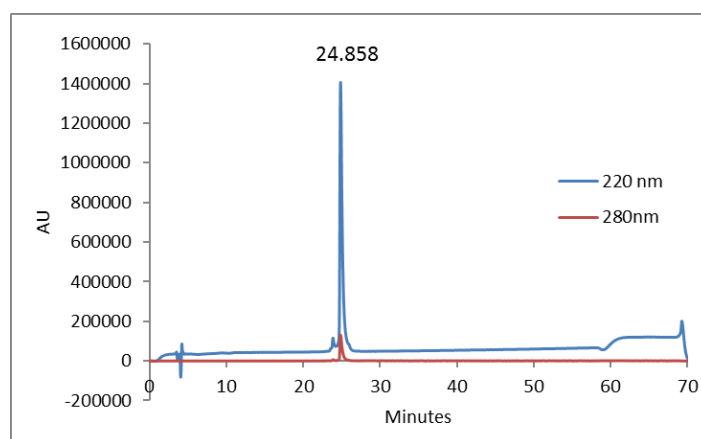

**Figure S57.** Analytical HPLC Data for WW variant **23Q**. Protein solution was injected onto a C18 analytical column and eluted using a linear gradient of 10-60% B (A=H<sub>2</sub>O, 0.1% TFA; B= MeCN, 0.1% TFA) over 50 minutes, followed by a 10 minute rinse (95% B), and a 10 minute column re-equilibration (10% B) with a flow rate of 1 mL/min.

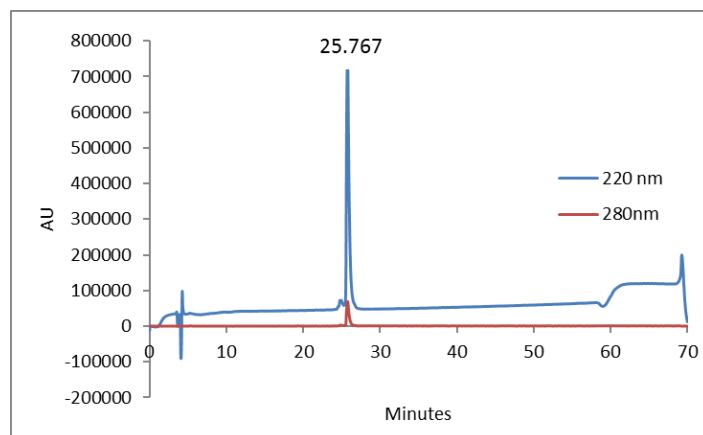

**Figure S58.** Analytical HPLC Data for WW variant **23Qp**. Protein solution was injected onto a C18 analytical column and eluted using a linear gradient of 10-60% B (A=H<sub>2</sub>O, 0.1% TFA; B= MeCN, 0.1% TFA) over 50 minutes, followed by a 10 minute rinse (95% B), and a 10 minute column re-equilibration (10% B) with a flow rate of 1 mL/min.

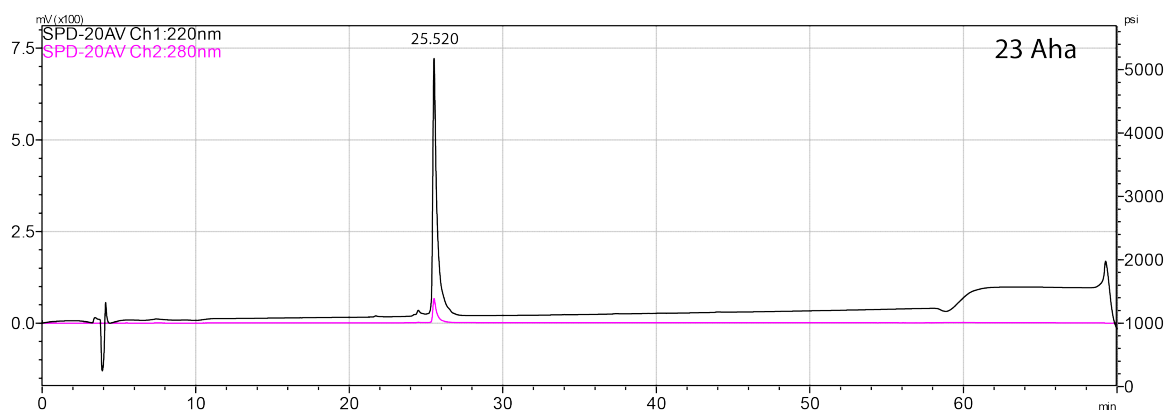

**Figure S60.** Analytical HPLC Data for WW variant **23X**. Protein solution was injected onto a C18 analytical column and eluted using a linear gradient of 10-60% B (A=H<sub>2</sub>O, 0.1% TFA; B= MeCN, 0.1% TFA) over 50 minutes, followed by a 10 minute rinse (95% B), and a 10 minute column re-equilibration (10% B) with a flow rate of 1 mL/min.

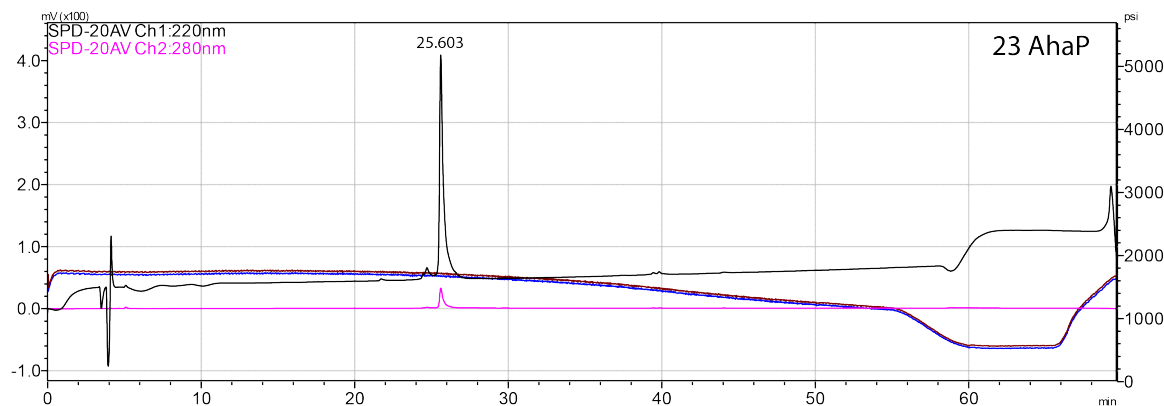

**Figure S61.** Analytical HPLC Data for WW variant **23Xp**. Protein solution was injected onto a C18 analytical column and eluted using a linear gradient of 10-60% B (A=H<sub>2</sub>O, 0.1% TFA; B= MeCN, 0.1% TFA) over 50 minutes, followed by a 10 minute rinse (95% B), and a 10 minute column re-equilibration (10% B) with a flow rate of 1 mL/min.

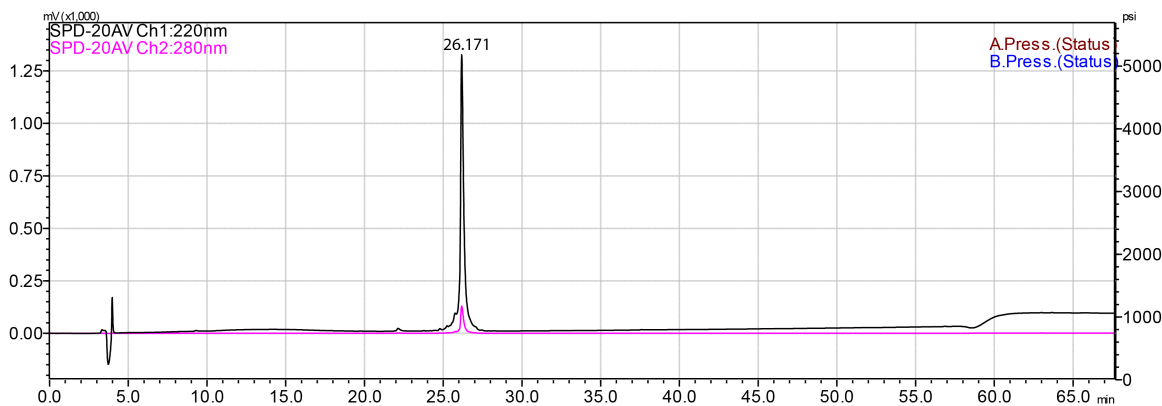

**Figure S62.** Analytical HPLC Data for WW variant **23Z**. Protein solution was injected onto a C18 analytical column and eluted using a linear gradient of 10-60% B (A=H<sub>2</sub>O, 0.1% TFA; B= MeCN, 0.1% TFA) over 50 minutes, followed by a 10 minute rinse (95% B), and a 10 minute column re-equilibration (10% B) with a flow rate of 1 mL/min.

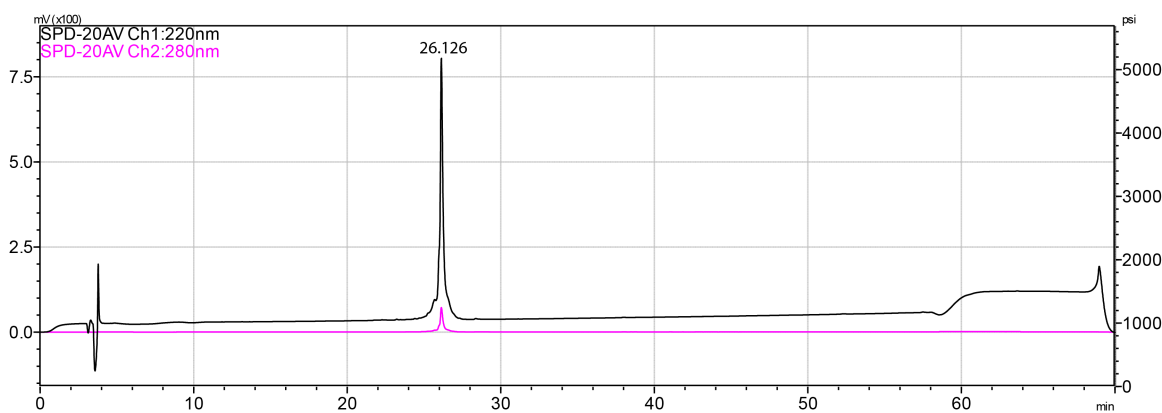

**Figure S63.** Analytical HPLC Data for WW variant **23Zp**. Protein solution was injected onto a C18 analytical column and eluted using a linear gradient of 10-60% B (A=H<sub>2</sub>O, 0.1% TFA; B= MeCN, 0.1% TFA) over 50 minutes, followed by a 10 minute rinse (95% B), and a 10 minute column re-equilibration (10% B) with a flow rate of 1 mL/min.

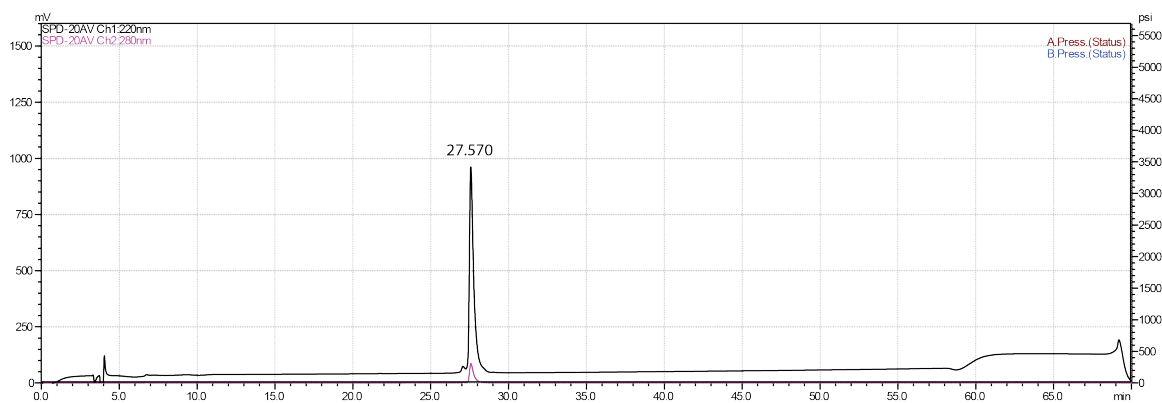

**Figure S64.** Analytical HPLC Data for WW variant **23Nbp**. Protein solution was injected onto a C18 analytical column and eluted using a linear gradient of 10-60% B (A=H<sub>2</sub>O, 0.1% TFA; B= MeCN, 0.1% TFA) over 50 minutes, followed by a 10 minute rinse (95% B), and a 10 minute column re-equilibration (10% B) with a flow rate of 1 mL/min.



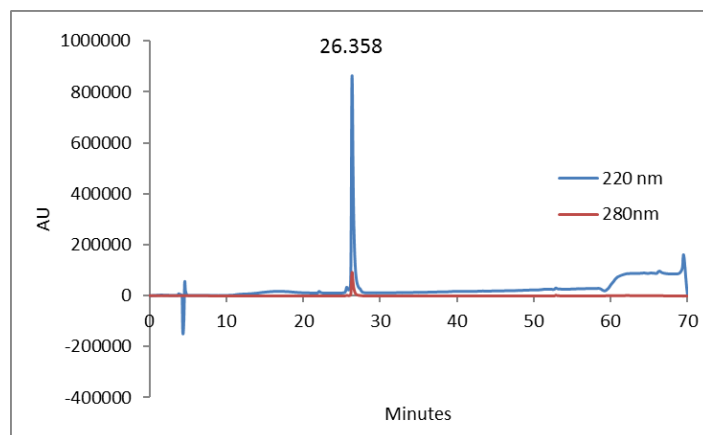

**Figure S65.** Analytical HPLC Data for WW variant **27Q**. Protein solution was injected onto a C18 analytical column and eluted using a linear gradient of 10-60% B (A=H<sub>2</sub>O, 0.1% TFA; B= MeCN, 0.1% TFA) over 50 minutes, followed by a 10 minute rinse (95% B), and a 10 minute column re-equilibration (10% B) with a flow rate of 1 mL/min.

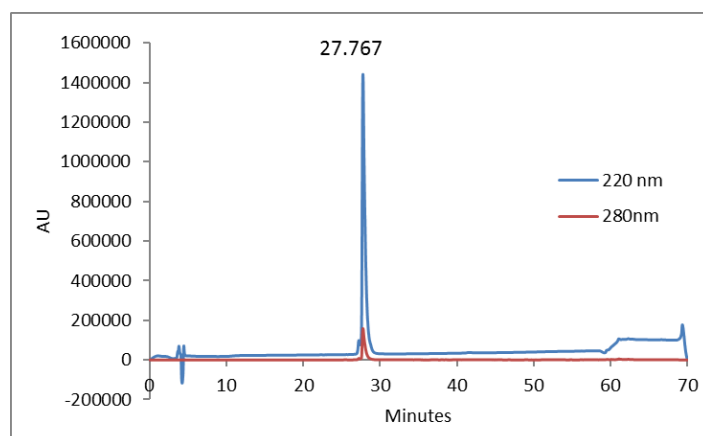

**Figure S66.** Analytical HPLC Data for WW variant **27Qp**. Protein solution was injected onto a C18 analytical column and eluted using a linear gradient of 10-60% B (A=H<sub>2</sub>O, 0.1% TFA; B= MeCN, 0.1% TFA) over 50 minutes, followed by a 10 minute rinse (95% B), and a 10 minute column re-equilibration (10% B) with a flow rate of 1 mL/min.

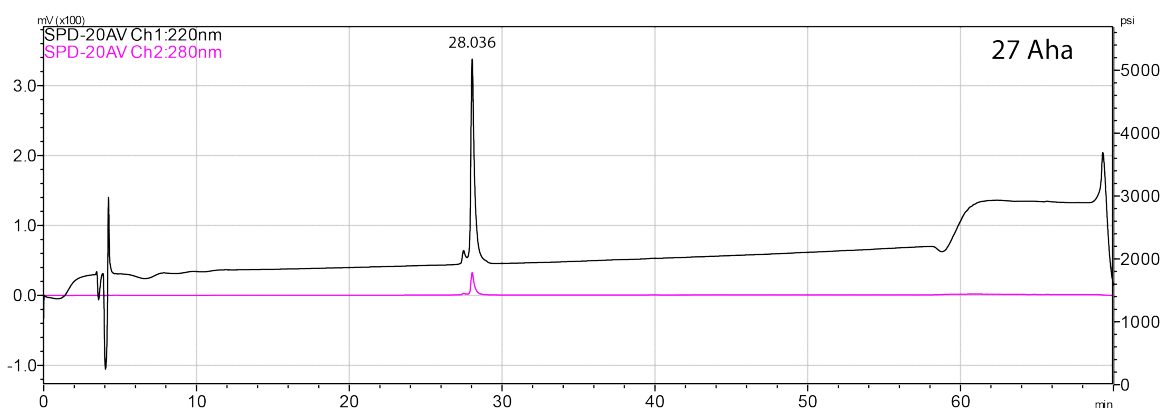

**Figure S67.** Analytical HPLC Data for WW variant **27X**. Protein solution was injected onto a C18 analytical column and eluted using a linear gradient of 10-60% B (A=H<sub>2</sub>O, 0.1% TFA; B= MeCN, 0.1% TFA) over 50 minutes, followed by a 10 minute rinse (95% B), and a 10 minute column re-equilibration (10% B) with a flow rate of 1 mL/min.

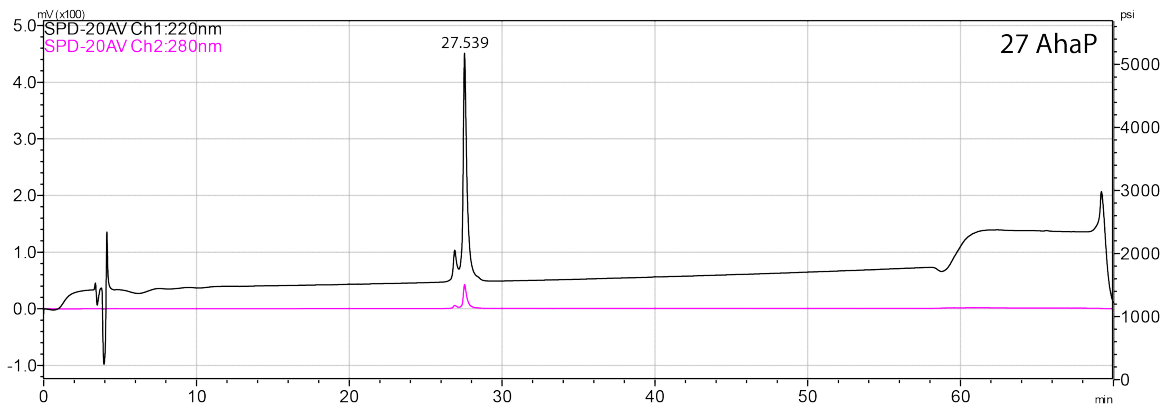

**Figure S69.** Analytical HPLC Data for WW variant **27Xp**. Protein solution was injected onto a C18 analytical column and eluted using a linear gradient of 10-60% B (A=H<sub>2</sub>O, 0.1% TFA; B= MeCN, 0.1% TFA) over 50 minutes, followed by a 10 minute rinse (95% B), and a 10 minute column re-equilibration (10% B) with a flow rate of 1 mL/min.

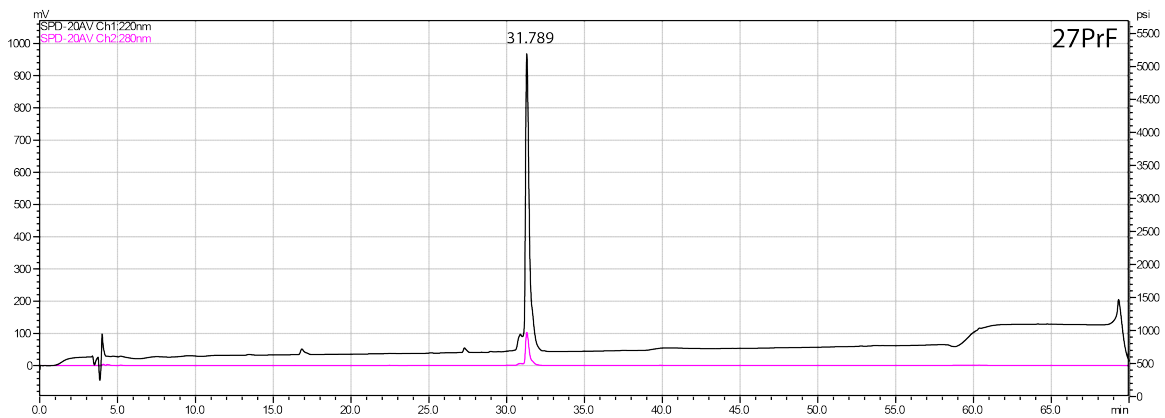

**Figure S70.** Analytical HPLC Data for WW variant **27Z**. Protein solution was injected onto a C18 analytical column and eluted using a linear gradient of 10-60% B (A=H<sub>2</sub>O, 0.1% TFA; B= MeCN, 0.1% TFA) over 50 minutes, followed by a 10 minute rinse (95% B), and a 10 minute column re-equilibration (10% B) with a flow rate of 1 mL/min.

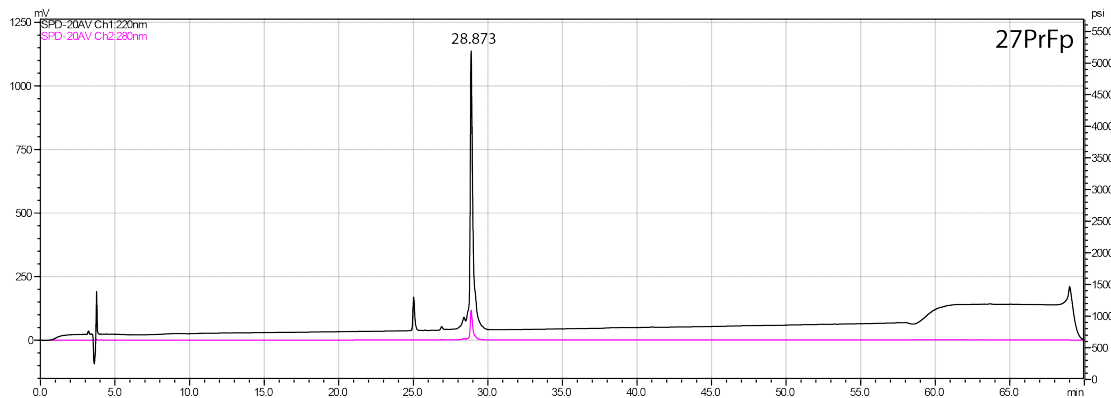

**Figure S71.** Analytical HPLC Data for WW variant **27Zp**. Protein solution was injected onto a C18 analytical column and eluted using a linear gradient of 10-60% B (A=H<sub>2</sub>O, 0.1% TFA; B= MeCN, 0.1% TFA) over 50 minutes, followed by a 10 minute rinse (95% B), and a 10 minute column re-equilibration (10% B) with a flow rate of 1 mL/min.

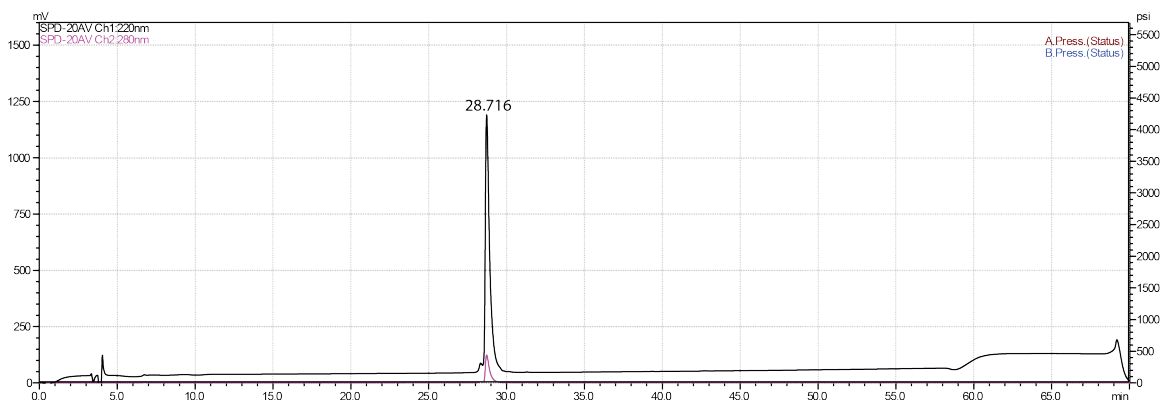

**Figure S72.** Analytical HPLC Data for WW variant **27Nbp**. Protein solution was injected onto a C18 analytical column and eluted using a linear gradient of 10-60% B (A=H<sub>2</sub>O, 0.1% TFA; B= MeCN, 0.1% TFA) over 50 minutes, followed by a 10 minute rinse (95% B), and a 10 minute column re-equilibration (10% B) with a flow rate of 1 mL/min.

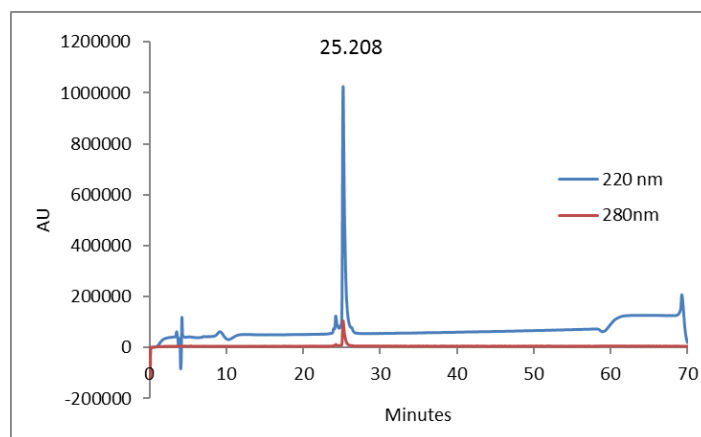

**Figure S73.** Analytical HPLC Data for WW variant **29Q**. Protein solution was injected onto a C18 analytical column and eluted using a linear gradient of 10-60% B (A=H<sub>2</sub>O, 0.1% TFA; B= MeCN, 0.1% TFA) over 50 minutes, followed by a 10 minute rinse (95% B), and a 10 minute column re-equilibration (10% B) with a flow rate of 1 mL/min.

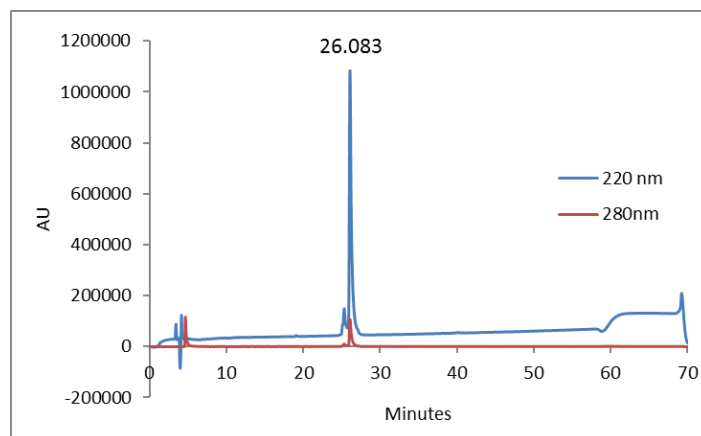

**Figure S74.** Analytical HPLC Data for WW variant **29Qp**. Protein solution was injected onto a C18 analytical column and eluted using a linear gradient of 10-60% B (A=H<sub>2</sub>O, 0.1% TFA; B= MeCN, 0.1% TFA) over 50 minutes, followed by a 10 minute rinse (95% B), and a 10 minute column re-equilibration (10% B) with a flow rate of 1 mL/min.

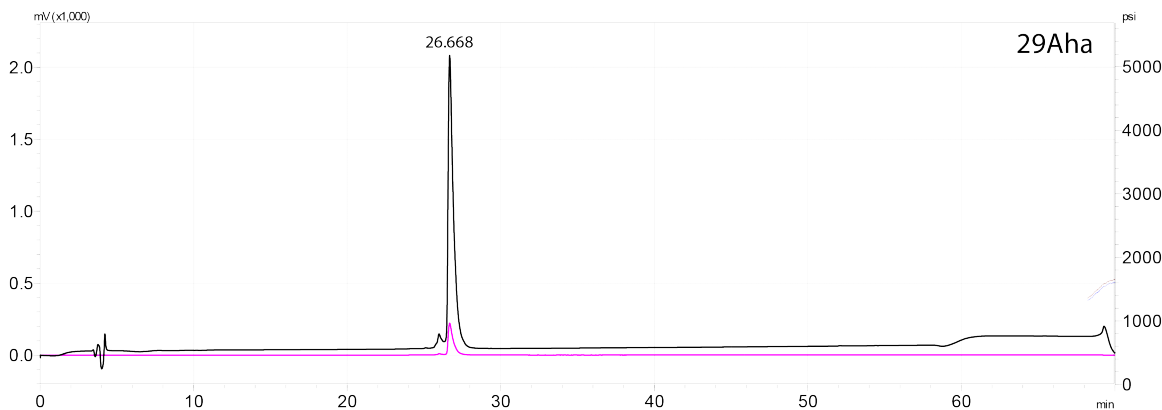

**Figure S75.** Analytical HPLC Data for WW variant **29X**. Protein solution was injected onto a C18 analytical column and eluted using a linear gradient of 10-60% B (A=H<sub>2</sub>O, 0.1% TFA; B= MeCN, 0.1% TFA) over 50 minutes, followed by a 10 minute rinse (95% B), and a 10 minute column re-equilibration (10% B) with a flow rate of 1 mL/min.

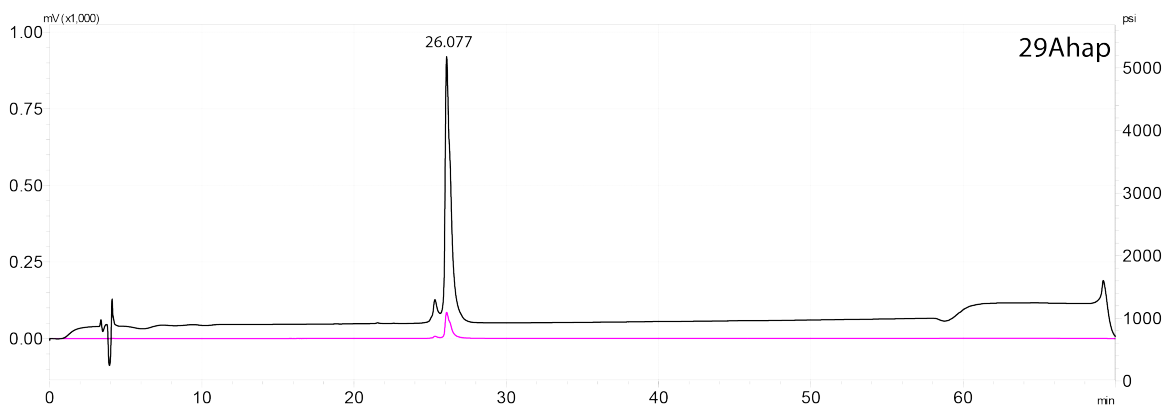

**Figure S76.** Analytical HPLC Data for WW variant **29Xp**. Protein solution was injected onto a C18 analytical column and eluted using a linear gradient of 10-60% B (A=H<sub>2</sub>O, 0.1% TFA; B= MeCN, 0.1% TFA) over 50 minutes, followed by a 10 minute rinse (95% B), and a 10 minute column re-equilibration (10% B) with a flow rate of 1 mL/min.

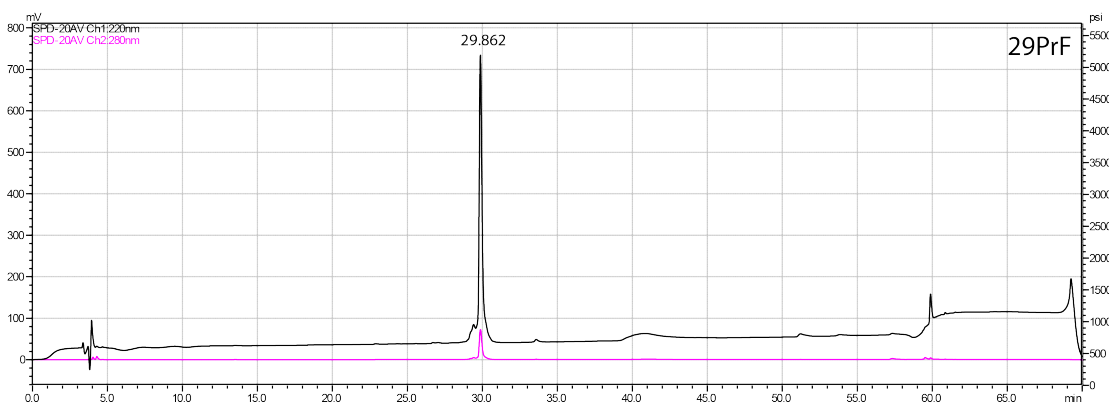

**Figure S77.** Analytical HPLC Data for WW variant **29Z**. Protein solution was injected onto a C18 analytical column and eluted using a linear gradient of 10-60% B (A=H<sub>2</sub>O, 0.1% TFA; B= MeCN, 0.1% TFA) over 50 minutes, followed by a 10 minute rinse (95% B), and a 10 minute column re-equilibration (10% B) with a flow rate of 1 mL/min.

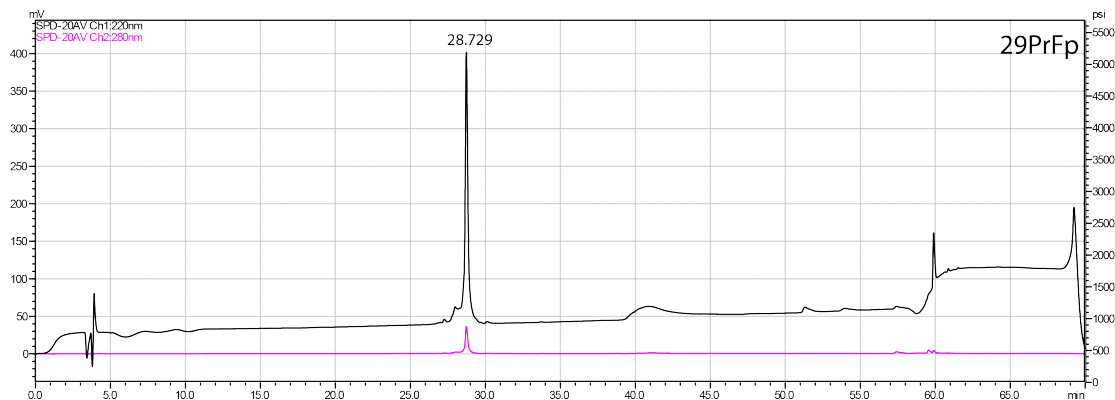

**Figure S78.** Analytical HPLC Data for WW variant **29Zp**. Protein solution was injected onto a C18 analytical column and eluted using a linear gradient of 10-60% B (A=H<sub>2</sub>O, 0.1% TFA; B= MeCN, 0.1% TFA) over 50 minutes, followed by a 10 minute rinse (95% B), and a 10 minute column re-equilibration (10% B) with a flow rate of 1 mL/min.

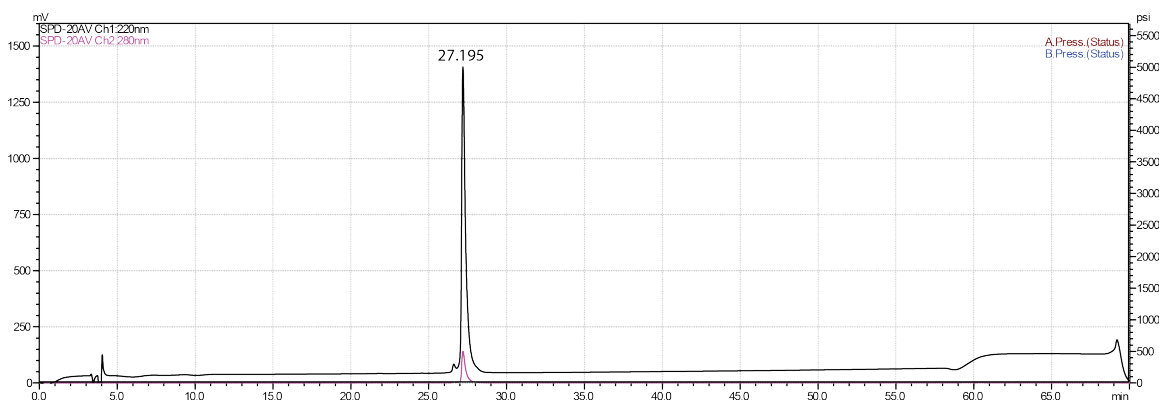

**Figure S79.** Analytical HPLC Data for WW variant **29Nbp**. Protein solution was injected onto a C18 analytical column and eluted using a linear gradient of 10-60% B (A=H<sub>2</sub>O, 0.1% TFA; B= MeCN, 0.1% TFA) over 50 minutes, followed by a 10 minute rinse (95% B), and a 10 minute column re-equilibration (10% B) with a flow rate of 1 mL/min.

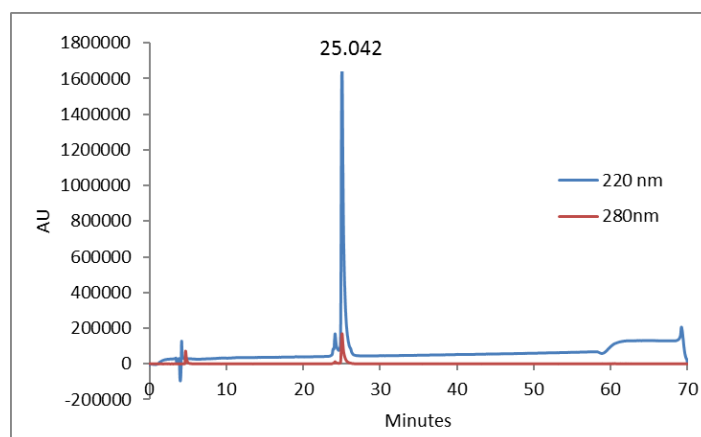

**Figure S80.** Analytical HPLC Data for WW variant **32Q**. Protein solution was injected onto a C18 analytical column and eluted using a linear gradient of 10-60% B (A=H<sub>2</sub>O, 0.1% TFA; B= MeCN, 0.1% TFA) over 50 minutes, followed by a 10 minute rinse (95% B), and a 10 minute column re-equilibration (10% B) with a flow rate of 1 mL/min.

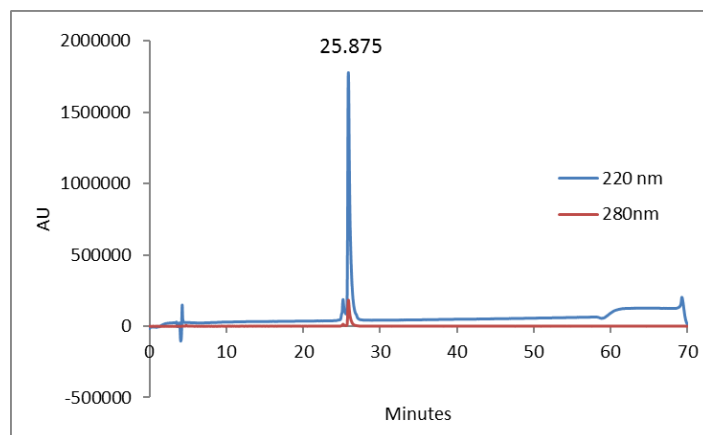

**Figure S81.** Analytical HPLC Data for WW variant **32Qp**. Protein solution was injected onto a C18 analytical column and eluted using a linear gradient of 10-60% B (A=H<sub>2</sub>O, 0.1% TFA; B= MeCN, 0.1% TFA) over 50 minutes, followed by a 10 minute rinse (95% B), and a 10 minute column re-equilibration (10% B) with a flow rate of 1 mL/min.

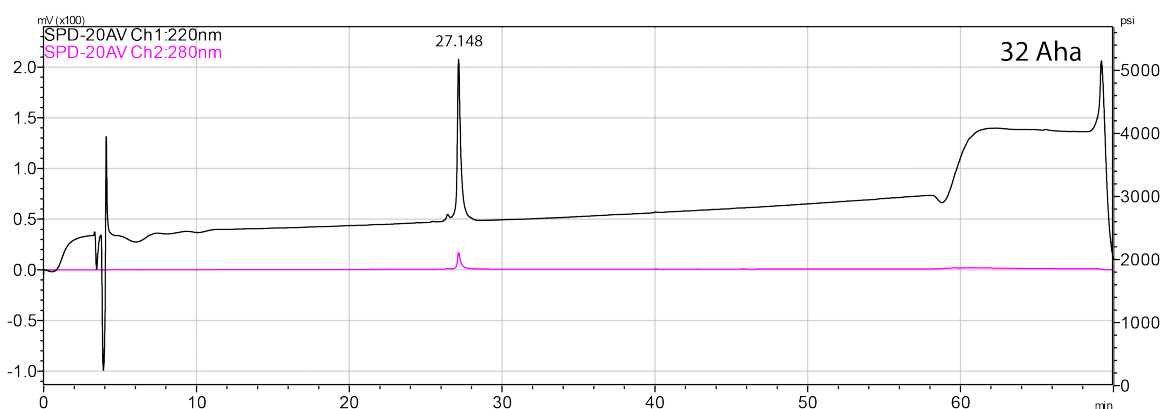

**Figure S82.** Analytical HPLC Data for WW variant **32X**. Protein solution was injected onto a C18 analytical column and eluted using a linear gradient of 10-60% B (A=H<sub>2</sub>O, 0.1% TFA; B= MeCN, 0.1% TFA) over 50 minutes, followed by a 10 minute rinse (95% B), and a 10 minute column re-equilibration (10% B) with a flow rate of 1 mL/min.

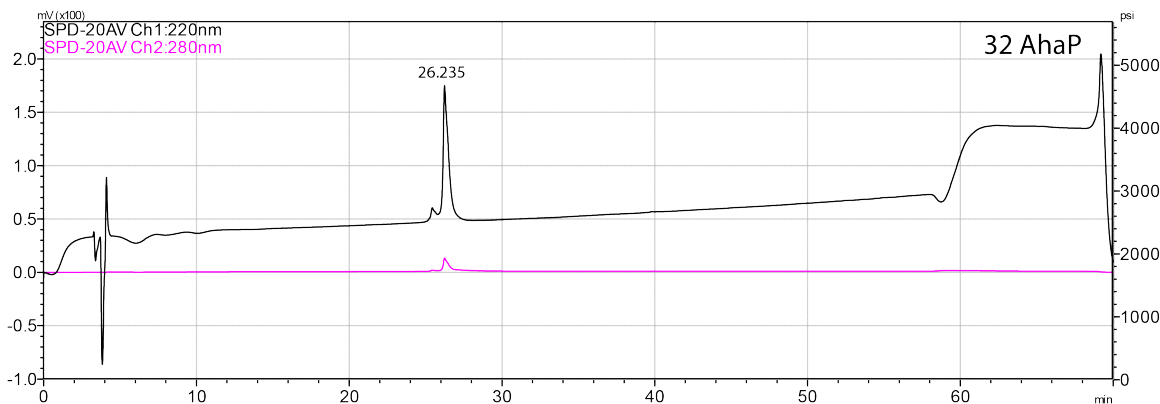

**Figure S83.** Analytical HPLC Data for WW variant **32Xp**. Protein solution was injected onto a C18 analytical column and eluted using a linear gradient of 10-60% B (A=H<sub>2</sub>O, 0.1% TFA; B= MeCN, 0.1% TFA) over 50 minutes, followed by a 10 minute rinse (95% B), and a 10 minute column re-equilibration (10% B) with a flow rate of 1 mL/min.

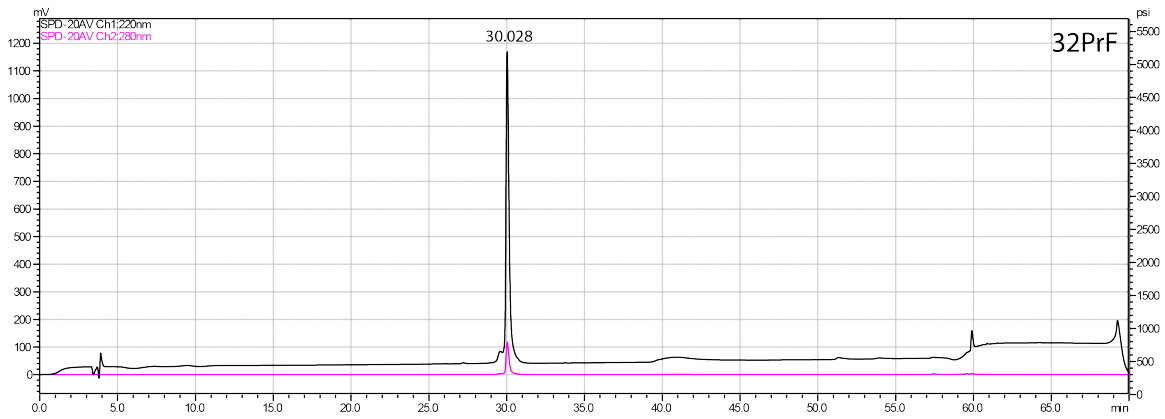

**Figure S84.** Analytical HPLC Data for WW variant **32Z**. Protein solution was injected onto a C18 analytical column and eluted using a linear gradient of 10-60% B (A=H<sub>2</sub>O, 0.1% TFA; B= MeCN, 0.1% TFA) over 50 minutes, followed by a 10 minute rinse (95% B), and a 10 minute column re-equilibration (10% B) with a flow rate of 1 mL/min.

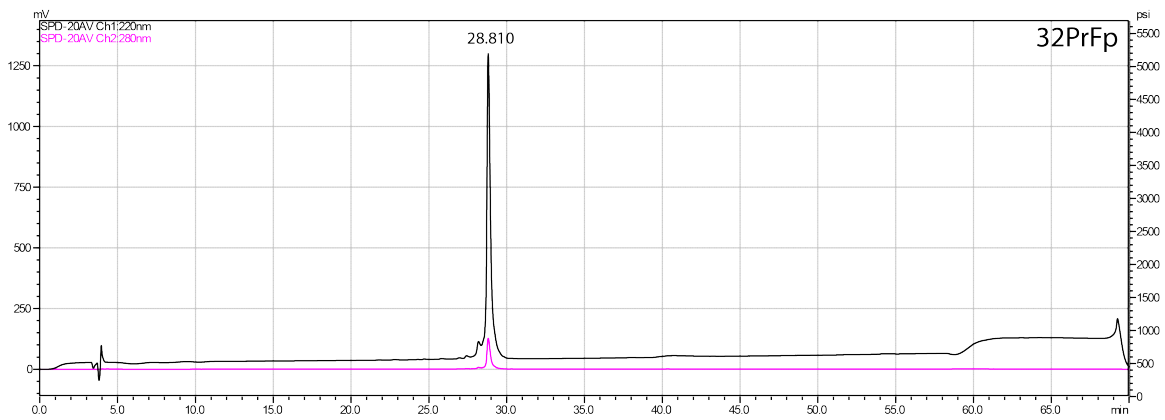

**Figure S85.** Analytical HPLC Data for WW variant **32Zp**. Protein solution was injected onto a C18 analytical column and eluted using a linear gradient of 10-60% B (A=H<sub>2</sub>O, 0.1% TFA; B= MeCN, 0.1% TFA) over 50 minutes, followed by a 10 minute rinse (95% B), and a 10 minute column re-equilibration (10% B) with a flow rate of 1 mL/min.

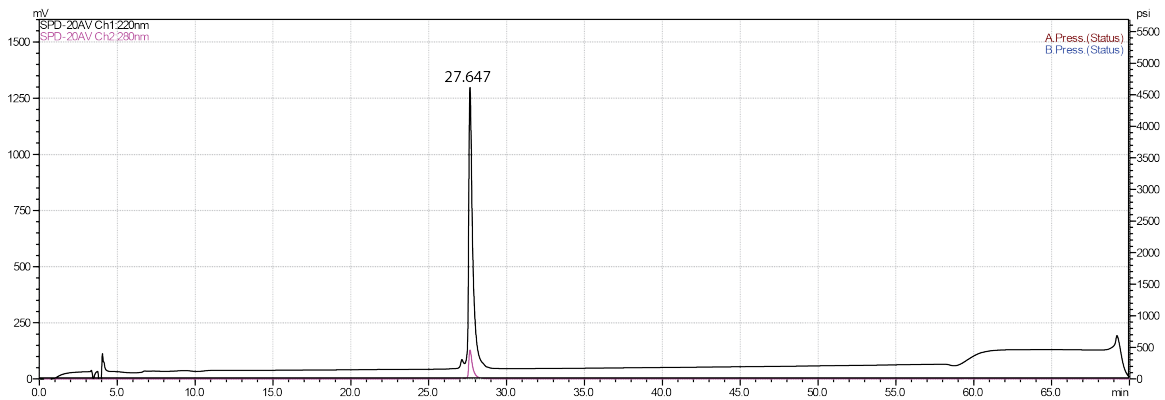

**Figure S86.** Analytical HPLC Data for WW variant **32Nbp**. Protein solution was injected onto a C18 analytical column and eluted using a linear gradient of 10-60% B (A=H<sub>2</sub>O, 0.1% TFA; B= MeCN, 0.1% TFA) over 50 minutes, followed by a 10 minute rinse (95% B), and a 10 minute column re-equilibration (10% B) with a flow rate of 1 mL/min.

## 2. Biophysical Characterization of WW Variants

Measurements were made with an Aviv 420 Circular Dichroism Spectropolarimeter, using quartz cuvettes with a path length of 0.1 cm. Protein solutions were prepared in 20 mM sodium phosphate buffer, pH 7, and protein concentrations were determined spectroscopically based on tyrosine and tryptophan absorbance at 280 nm in 6 M guanidine hydrochloride + 20 mM sodium phosphate ( $\epsilon_{\text{Trp}} = 5690 \text{ M}^{-1}\text{cm}^{-1}$ ,  $\epsilon_{\text{Tyr}} = 1280 \text{ M}^{-1}\text{cm}^{-1}$ ).<sup>5</sup> CD spectra of 30  $\mu\text{M}$  solutions were obtained from 260 to 200 nm at 25°C. Variable temperature CD data were obtained at least in triplicate by monitoring the molar ellipticity at 222 nm of 30  $\mu\text{M}$  solutions each protein variant (30  $\mu\text{M}$ ) in 20 mM sodium phosphate (pH 7) from 1 to 95°C at 2 °C intervals, with 120 s equilibration time between data points and 30 s averaging time.

Triplicate variable temperature CD data for each WW variant and their individual variants were fit globally to a two-state model for thermally-induced unfolding of a monomeric proteins as shown in equations S1–S3:

$$[\theta] = \frac{(D_0 + D_1 \cdot T) + K_f(N_0 + N_1 \cdot T)}{1 + K_f}, \quad (\text{S1})$$

where  $[\theta]$  is molar ellipticity;  $T$  is temperature in Kelvin;  $D_0$  is the  $y$ -intercept and  $D_1$  is the slope of the post-transition baseline;  $N_0$  is the  $y$ -intercept and  $N_1$  is the slope of the pre-transition baseline; and  $K_f$  is the temperature-dependent folding equilibrium constant.  $K_f$  is related to the temperature-dependent free energy of folding  $\Delta G_f(T)$  according to the following equation:

$$K_f = \exp\left[\frac{-\Delta G_f(T)}{RT}\right], \quad (\text{S2})$$

where  $R$  is the universal gas constant (0.0019872 kcal/mol/K).  $\Delta G_f(T)$  was fit to the following equation:

$$\Delta G_f = \frac{\Delta H(T_m)(T_m - T)}{T_m} + \Delta C_p \cdot (T - T_m - T \cdot \ln\left[\frac{T}{T_m}\right]) \quad (\text{S3})$$

where the fit parameters are  $T_m$  (the midpoint of the unfolding transition; the temperature at which  $\Delta G_f = 0$ );  $\Delta H(T_m)$ , the change in enthalpy upon folding at  $T_m$ ; and  $\Delta C_p$ , the change in heat capacity upon folding. The parameters for equations S1-S3 were used to calculate the values of the folding free energy  $\Delta G_f$  for WW variants



in the main text. Far-UV CD spectra and variable temperature CD data for these compounds are shown below in Figures S87-S116.

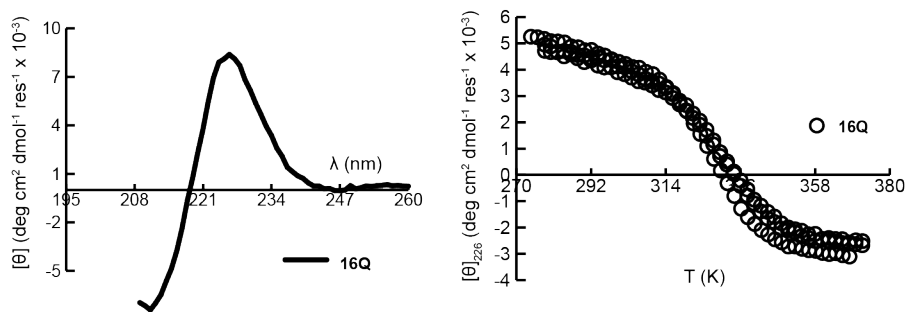

| Protien | Tm          | $\Delta H(T_m)$ | R <sup>2</sup> | rmsd error |
|---------|-------------|-----------------|----------------|------------|
| 16Q     | 329.8 ± 0.1 | -28.7 ± 0.3     | 0.9997         | 0.0497     |

**Figure S87.** CD spectra (50 μM) and variable temperature CD data (50 μM) for WW variant **16Q** in 20 mM sodium phosphate, pH 7. Fit parameters appear in the table, along with standard errors.

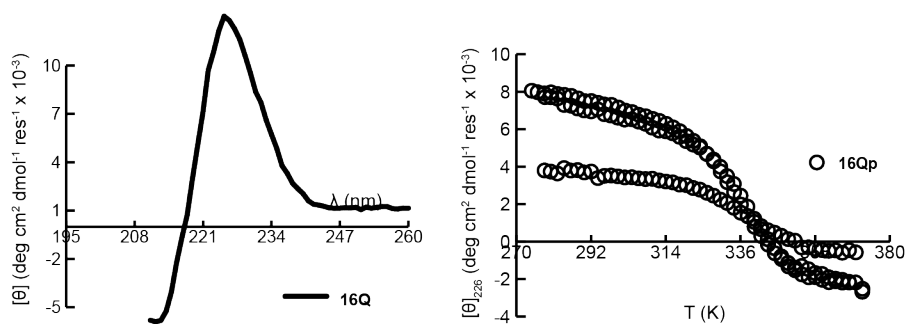

| Protien | Tm          | $\Delta H(T_m)$ | R <sup>2</sup> | rmsd error |
|---------|-------------|-----------------|----------------|------------|
| 16Qp    | 336.6 ± 0.1 | -32.8 ± 0.6     | 0.9994         | 0.0859     |

**Figure S88.** CD spectra (50 μM) and variable temperature CD data (50 μM) for WW variant **16Qp** in 20 mM sodium phosphate, pH 7. Fit parameters appear in the table, along with standard errors.

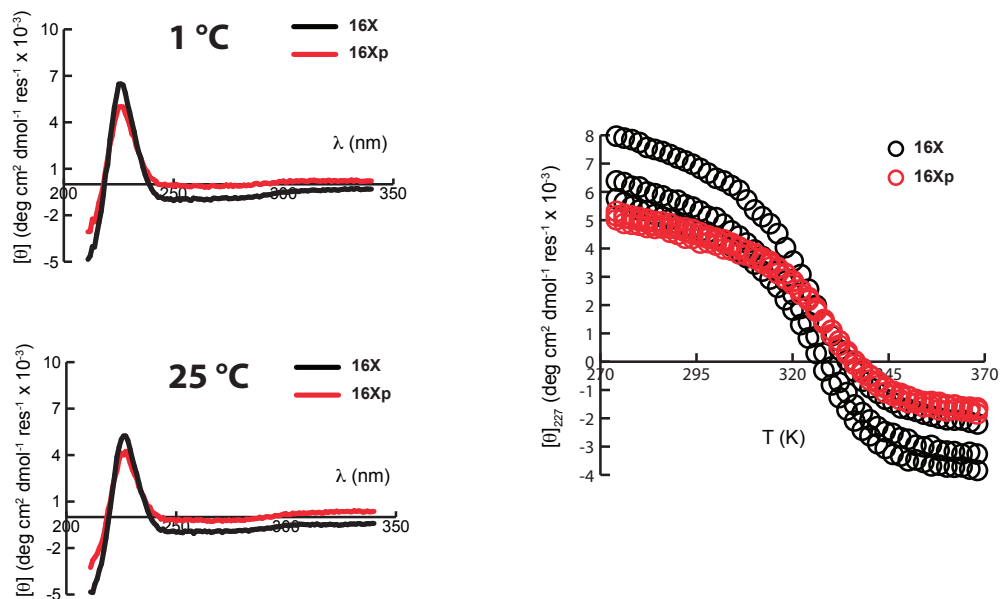

| Peptide     | T <sub>m</sub> /K | ΔH(T <sub>m</sub> ) / kcal mol <sup>-1</sup> | ΔC <sub>p</sub> / kcal mol <sup>-1</sup> K <sup>-1</sup> | R <sup>2</sup> | rmsd error |
|-------------|-------------------|----------------------------------------------|----------------------------------------------------------|----------------|------------|
| <b>16X</b>  | 325.9 ± 0.3       | -29.0 ± 0.5                                  | -0.52 ± 0.10                                             | 0.9999         | 0.048      |
| <b>16Xp</b> | 330.0 ± 0.3       | -31.8 ± 0.4                                  | -0.36 ± 0.12                                             | 0.9999         | 0.030      |

**Figure S89.** CD spectra (50 μM) and variable temperature CD data (50 μM) for WW variants **16X** (black) and **16Xp** (red) in 20 mM sodium phosphate, pH 7. Fit parameters appear in the table, along with standard errors.

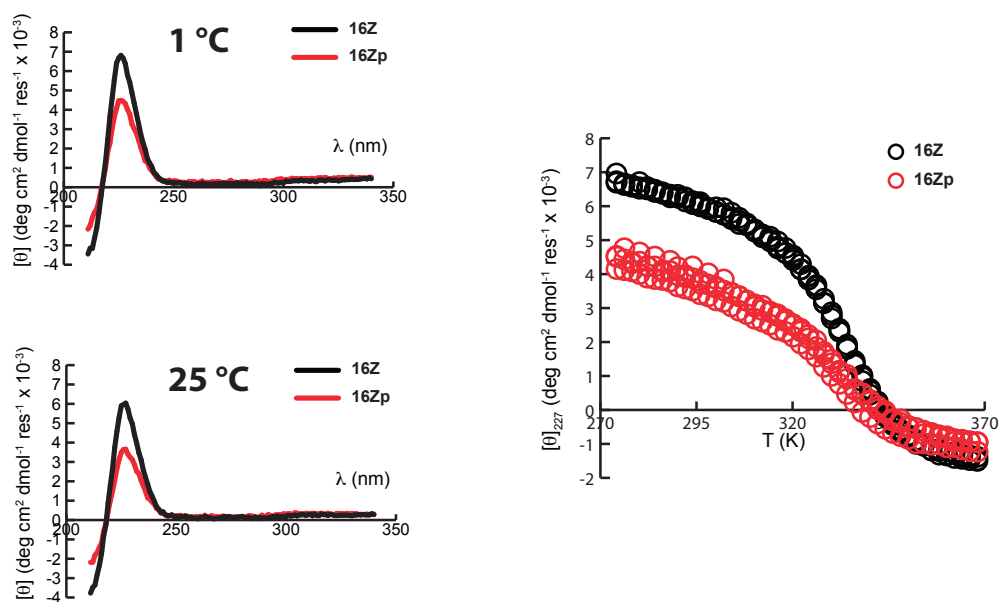

| Peptide     | T <sub>m</sub> /K | ΔH(T <sub>m</sub> ) / kcal mol <sup>-1</sup> | ΔC <sub>p</sub> / kcal mol <sup>-1</sup> K <sup>-1</sup> | R <sup>2</sup> | rmsd error |
|-------------|-------------------|----------------------------------------------|----------------------------------------------------------|----------------|------------|
| <b>16Z</b>  | 333.4 ± 0.2       | -31.8 ± 0.6                                  | -0.69 ± 0.04                                             | 0.9998         | 0.045      |
| <b>16Zp</b> | 332.8 ± 0.5       | -33.2 ± 2.1                                  | -0.82 ± 0.08                                             | 0.9992         | 0.072      |

**Figure S90.** CD spectra (50 μM) and variable temperature CD data (50 μM) for WW variants **16Z** (black) and **16Zp** (red) in 20 mM sodium phosphate, pH 7. Fit parameters appear in the table, along with standard errors.

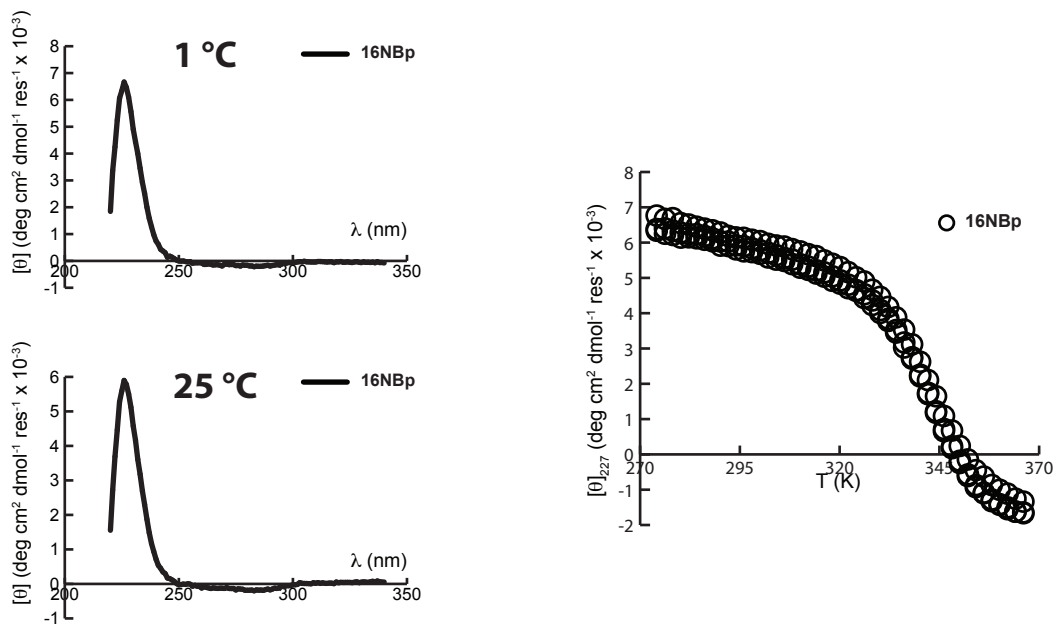

| Peptide | $T_m$             | $\Delta H(T_m)$   | $\Delta C_p$     | $R^2$   | rmsd error |
|---------|-------------------|-------------------|------------------|---------|------------|
| 16NBp   | $343.40 \pm 0.05$ | $-36.13 \pm 0.27$ | $-0.64 \pm 0.03$ | 0.99989 | 0.02993    |

**Figure S91.** CD spectra (50  $\mu$ M) and variable temperature CD data (50  $\mu$ M) for WW variant **16NBp** in 20 mM sodium phosphate, pH 7. Fit parameters appear in the table, along with standard errors.

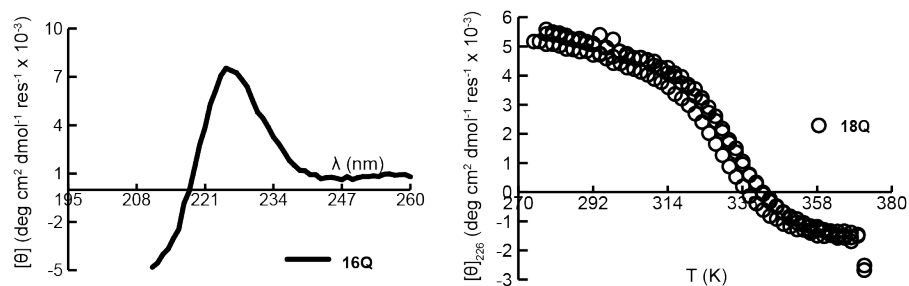

| Protien | $T_m$           | $\Delta H(T_m)$ | $R^2$  | rmsd error |
|---------|-----------------|-----------------|--------|------------|
| 18Q     | $331.6 \pm 0.2$ | $-28.8 \pm 0.5$ | 0.9995 | 0.0660     |

**Figure S92.** CD spectra (50  $\mu$ M) and variable temperature CD data (50  $\mu$ M) for WW variant **18Q** in 20 mM sodium phosphate, pH 7. Fit parameters appear in the table, along with standard errors.

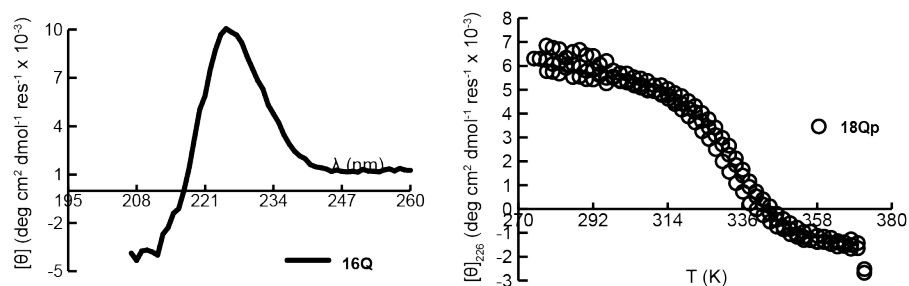

| Protien | T <sub>m</sub> | ΔH(T <sub>m</sub> ) | R <sup>2</sup> | rmsd error |
|---------|----------------|---------------------|----------------|------------|
| 18Qp    | 332.9 ± 0.2    | -30.6 ± 0.6         | 0.9994         | 0.0825     |

**Figure S93.** CD spectra (50 μM) and variable temperature CD data (50 μM) for WW variant **18Qp** in 20 mM sodium phosphate, pH 7. Fit parameters appear in the table, along with standard errors.

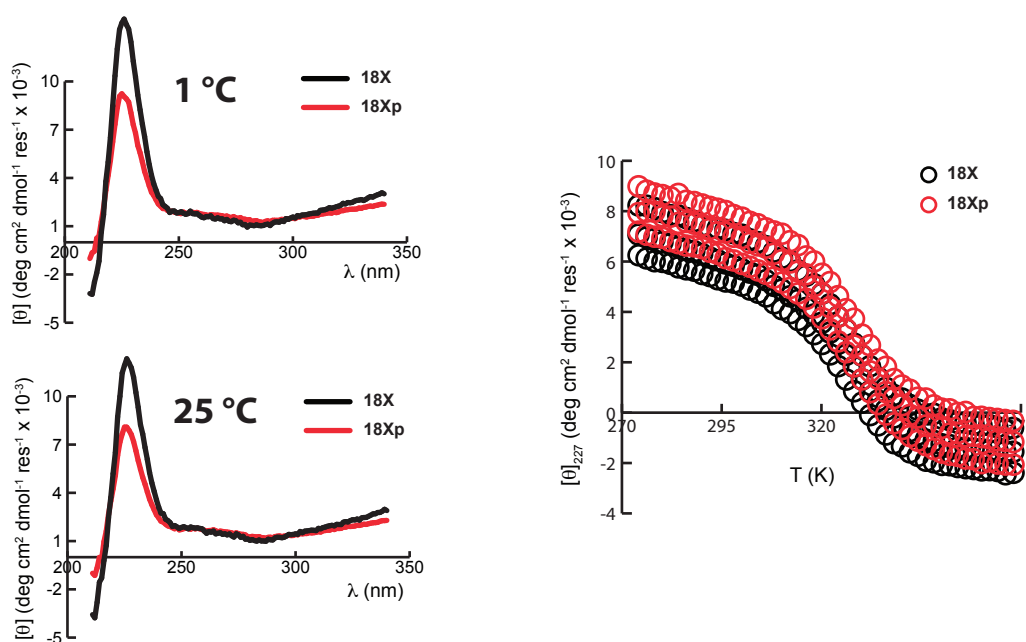

| Peptide     | T <sub>m</sub> / K | ΔH(T <sub>m</sub> ) / kcal mol <sup>-1</sup> | ΔC <sub>p</sub> / kcal mol <sup>-1</sup> K <sup>-1</sup> | R <sup>2</sup> | rmsd error |
|-------------|--------------------|----------------------------------------------|----------------------------------------------------------|----------------|------------|
| <b>18X</b>  | 327.6 ± 0.4        | -31.5 ± 0.6                                  | -0.48 ± 0.15                                             | 0.9998         | 0.045      |
| <b>18Xp</b> | 329.2 ± 0.2        | -30.9 ± 0.5                                  |                                                          | 0.9998         | 0.053      |

**Figure S94.** CD spectra (50 μM) and variable temperature CD data (50 μM) for WW variants **18X** (black) and **18Xp** (red) in 20 mM sodium phosphate, pH 7. Fit parameters appear in the table, along with standard errors.

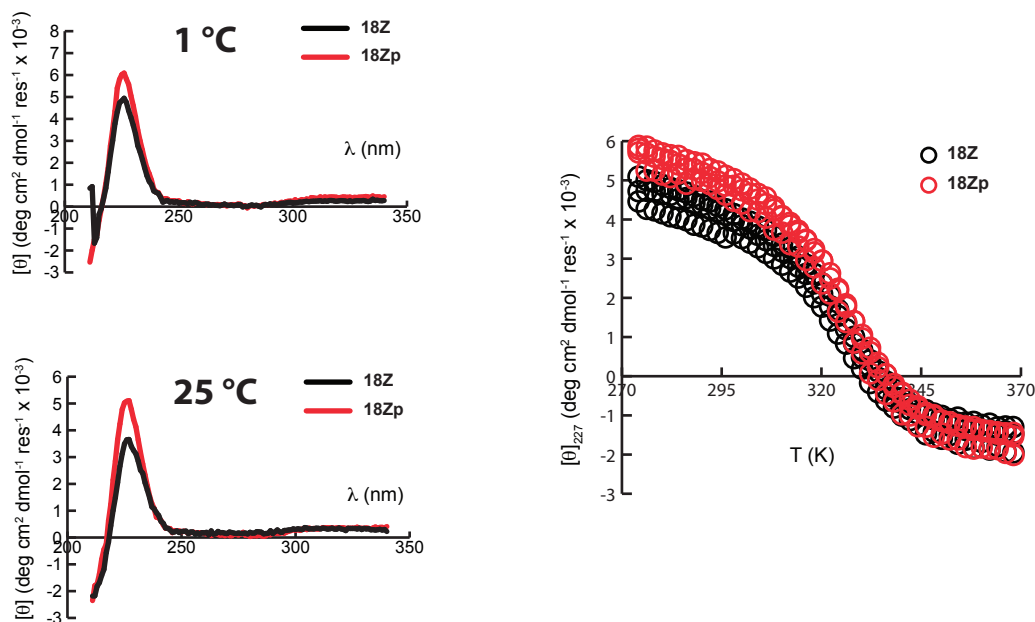

| Peptide     | $T_m$ /K    | $\Delta H(T_m)$ / kcal mol <sup>-1</sup> | $\Delta C_p$ / kcal mol <sup>-1</sup> K <sup>-1</sup> | $R^2$  | rmsd error |
|-------------|-------------|------------------------------------------|-------------------------------------------------------|--------|------------|
| <b>18Z</b>  | 326.0 ± 0.2 | -28.3 ± 0.7                              | -0.63 ± 0.07                                          | 0.9997 | 0.046      |
| <b>18Zp</b> | 326.6 ± 0.4 | -27.7 ± 0.7                              | -0.53 ± 0.12                                          | 0.9996 | 0.058      |

**Figure S95.** CD spectra (50 μM) and variable temperature CD data (50 μM) for WW variants **18Z** (black) and **18Zp** (red) in 20 mM sodium phosphate, pH 7. Fit parameters appear in the table, along with standard errors.

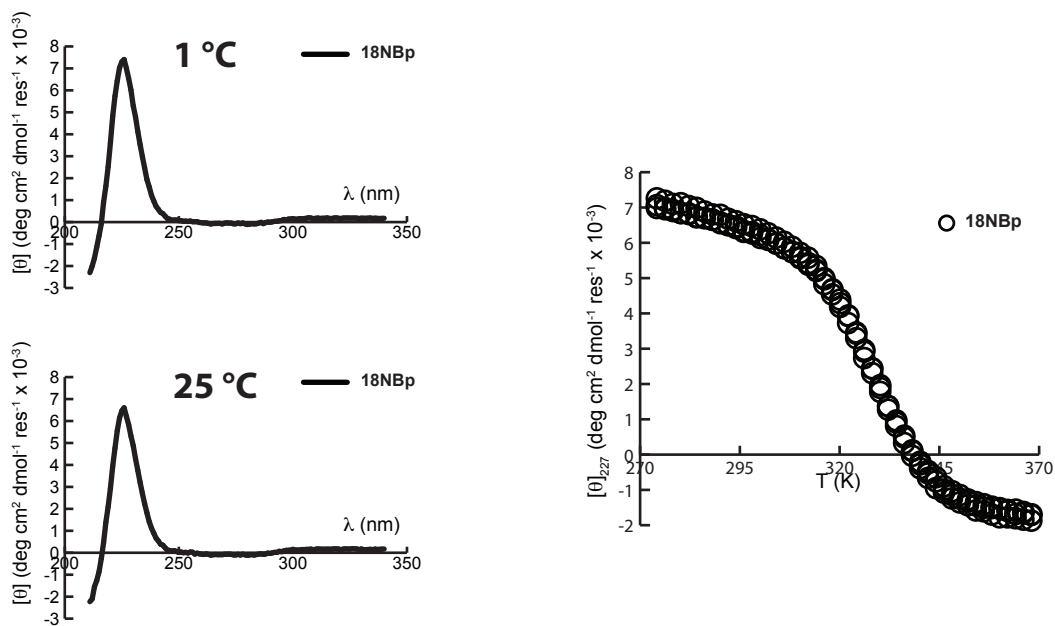

| Peptide      | $T_m$         | $\Delta H(T_m)$ | $\Delta C_p$ | $R^2$   | rmsd error |
|--------------|---------------|-----------------|--------------|---------|------------|
| <b>18NBp</b> | 330.44 ± 0.11 | -29.05 ± 0.21   | 0.09 ± 0.05  | 0.99987 | 0.04050    |

**Figure S96.** CD spectra (50 μM) and variable temperature CD data (50 μM) for WW variant **18NBp** in 20 mM sodium phosphate, pH 7. Fit parameters appear in the table, along with standard errors.

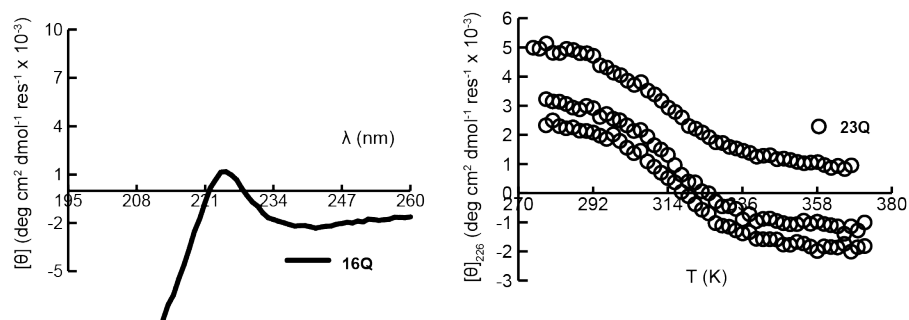

| Protien | Tm          | $\Delta H(T_m)$ | R <sup>2</sup> | rmsd error |
|---------|-------------|-----------------|----------------|------------|
| 23Q     | 312.6 ± 0.2 | -19.2 ± 0.4     | 0.9991         | 0.0946     |

**Figure S97.** CD spectra (50  $\mu$ M) and variable temperature CD data (50  $\mu$ M) for WW variant **23Q** in 20 mM sodium phosphate, pH 7. Fit parameters appear in the table, along with standard errors.

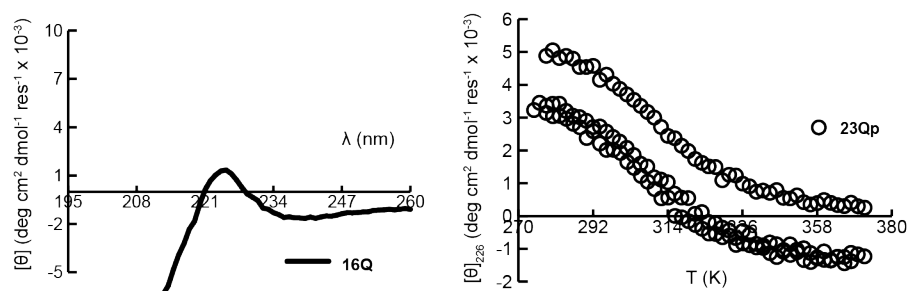

| Protien | Tm          | $\Delta H(T_m)$ | R <sup>2</sup> | rmsd error |
|---------|-------------|-----------------|----------------|------------|
| 23Qp    | 307.7 ± 0.3 | -14.7 ± 0.3     | 0.9992         | 0.0912     |

**Figure S98.** CD spectra (50  $\mu$ M) and variable temperature CD data (50  $\mu$ M) for WW variant **23Qp** in 20 mM sodium phosphate, pH 7. Fit parameters appear in the table, along with standard errors.

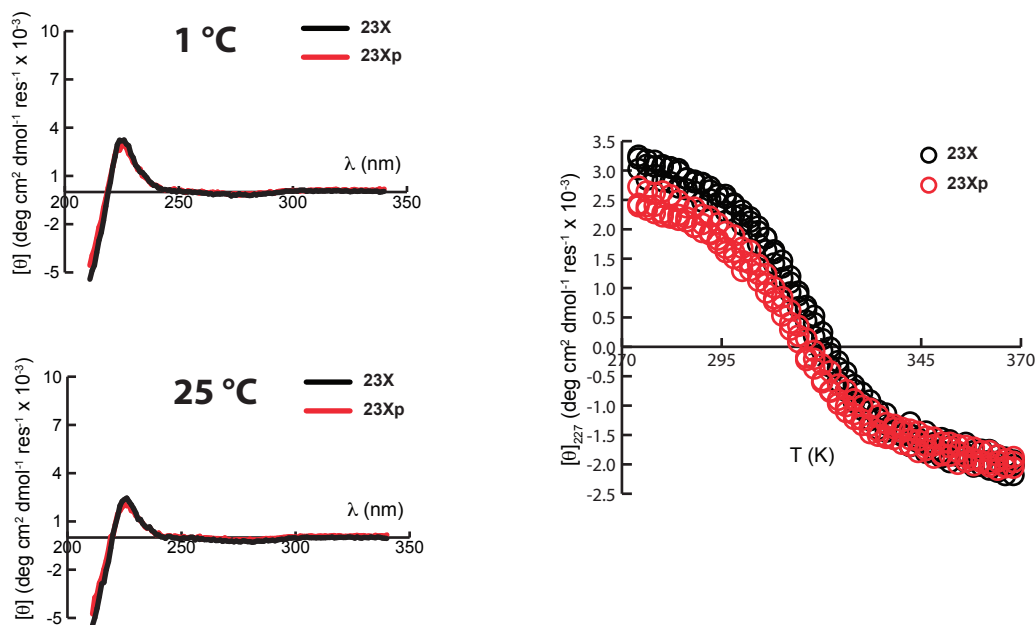

| Peptide     | T <sub>m</sub> /K | ΔH(T <sub>m</sub> ) / kcal mol <sup>-1</sup> | ΔC <sub>p</sub> / kcal mol <sup>-1</sup> K <sup>-1</sup> | R <sup>2</sup> | rmsd error |
|-------------|-------------------|----------------------------------------------|----------------------------------------------------------|----------------|------------|
| <b>23X</b>  | 317.8 ± 0.3       | -25.3 ± 0.8                                  |                                                          | 0.9993         | 0.052      |
| <b>23Xp</b> | 314.9 ± 0.4       | -27.2 ± 1.2                                  |                                                          | 0.9988         | 0.061      |

**Figure S99.** CD spectra (50 μM) and variable temperature CD data (50 μM) for WW variants **23X** (black) and **23Xp** (red) in 20 mM sodium phosphate, pH 7. Fit parameters appear in the table, along with standard errors.

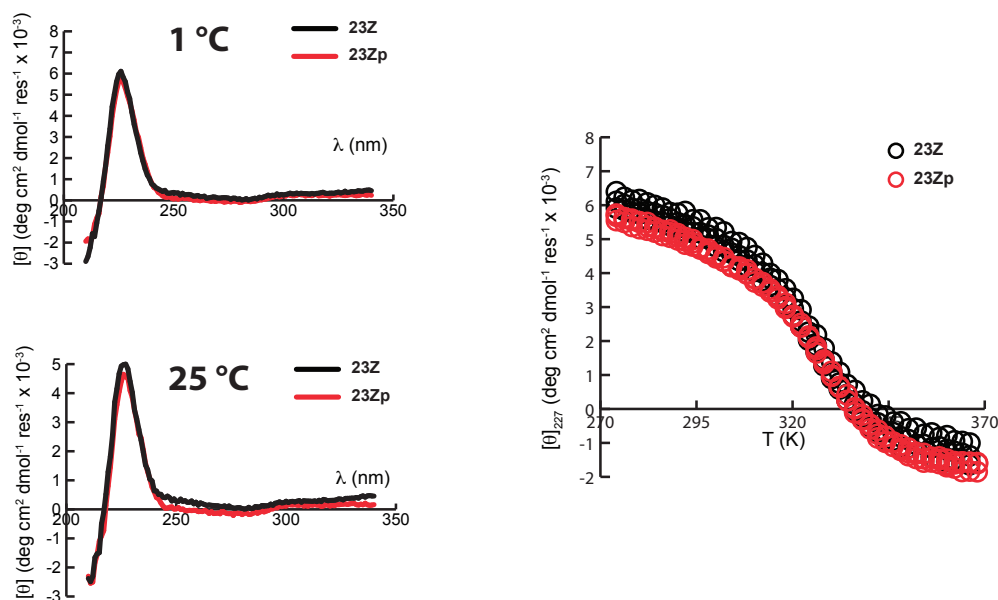

| Peptide     | T <sub>m</sub> /K | ΔH(T <sub>m</sub> ) / kcal mol <sup>-1</sup> | ΔC <sub>p</sub> / kcal mol <sup>-1</sup> K <sup>-1</sup> | R <sup>2</sup> | rmsd error |
|-------------|-------------------|----------------------------------------------|----------------------------------------------------------|----------------|------------|
| <b>23Z</b>  | 325.2 ± 0.2       | -26.6 ± 0.6                                  | -0.59 ± 0.06                                             | 0.9998         | 0.042      |
| <b>23Zp</b> | 328.7 ± 0.2       | -28.6 ± 0.7                                  | -0.65 ± 0.04                                             | 0.9998         | 0.042      |

**Figure S100.** CD spectra (50 μM) and variable temperature CD data (50 μM) for WW variants **23Z** (black) and **23Zp** (red) in 20 mM sodium phosphate, pH 7. Fit parameters appear in the table, along with standard errors.

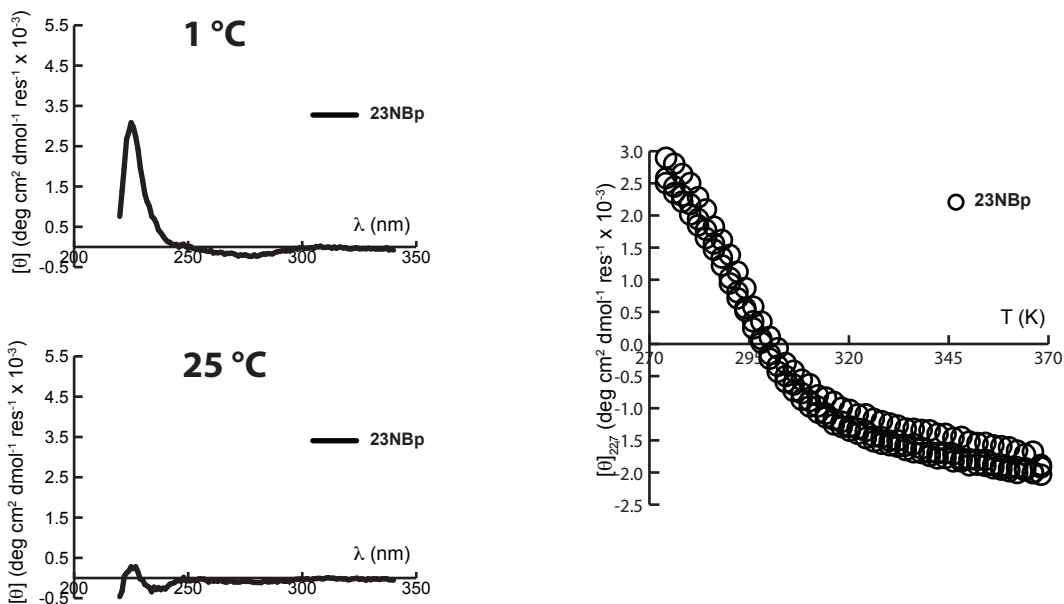

| Protein | $T_m$ (K)       | $\Delta H(T_m)$ (kcal/mol) | $\Delta C_p$ (kcal/mol/K) | $R^2$  | std error |
|---------|-----------------|----------------------------|---------------------------|--------|-----------|
| 23NBp   | $298.0 \pm 0.3$ | $-20.3 \pm 0.5$            | $0.59 \pm 0.04$           | 0.9997 | 0.025     |

**Figure S101.** CD spectra (50  $\mu$ M) and variable temperature CD data (50  $\mu$ M) for WW variant **23NBp** in 20 mM sodium phosphate, pH 7. Fit parameters appear in the table, along with standard errors.

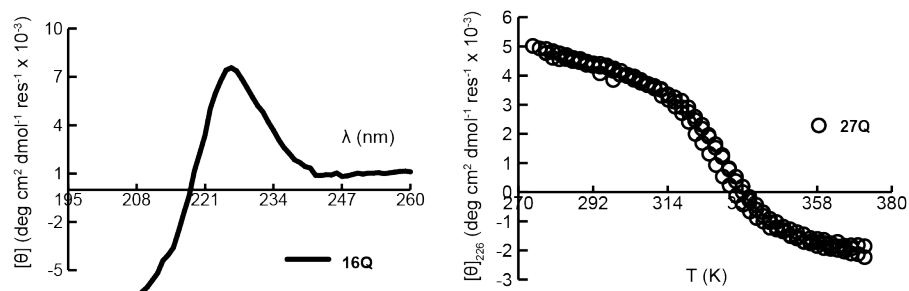

| Protien | $T_m$           | $\Delta H(T_m)$ | $R^2$  | rmsd error |
|---------|-----------------|-----------------|--------|------------|
| 27Q     | $329.5 \pm 0.2$ | $-27.5 \pm 0.4$ | 0.9996 | 0.0575     |

**Figure S102.** CD spectra (50  $\mu$ M) and variable temperature CD data (50  $\mu$ M) for WW variant **27Q** in 20 mM sodium phosphate, pH 7. Fit parameters appear in the table, along with standard errors.



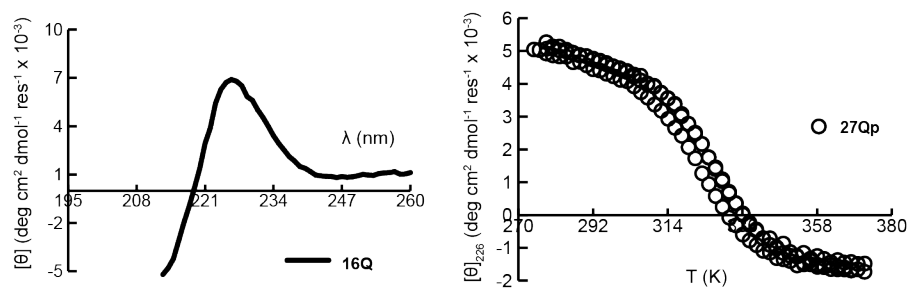

| Protien | T <sub>m</sub> | ΔH(T <sub>m</sub> ) | R <sup>2</sup> | rmsd error |
|---------|----------------|---------------------|----------------|------------|
| 27Qp    | 362.3 ± 0.1    | -26.9 ± 0.1         | 0.9998         | 0.0429     |

**Figure S103.** CD spectra (50 μM) and variable temperature CD data (50 μM) for WW variant **27Qp** in 20 mM sodium phosphate, pH 7. Fit parameters appear in the table, along with standard errors.

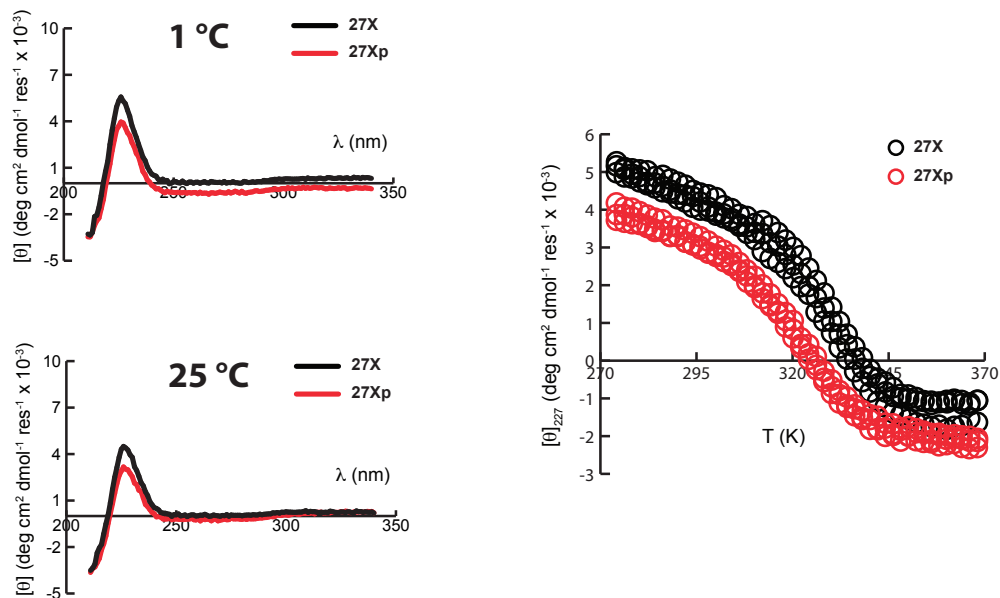

| Peptide     | T <sub>m</sub> / K | ΔH(T <sub>m</sub> ) / kcal mol <sup>-1</sup> | ΔC <sub>p</sub> / kcal mol <sup>-1</sup> K <sup>-1</sup> | R <sup>2</sup> | rmsd error |
|-------------|--------------------|----------------------------------------------|----------------------------------------------------------|----------------|------------|
| <b>27X</b>  | 331.7 ± 0.2        | -32.5 ± 0.8                                  | -0.67 ± 0.07                                             | 0.9992         | 0.071      |
| <b>27Xp</b> | 325.3 ± 0.2        | -25.6 ± 0.4                                  |                                                          | 0.9994         | 0.058      |

**Figure S104.** CD spectra (50 μM) and variable temperature CD data (50 μM) for WW variants **27X** (black) and **27Xp** (red) in 20 mM sodium phosphate, pH 7. Fit parameters appear in the table, along with standard errors.

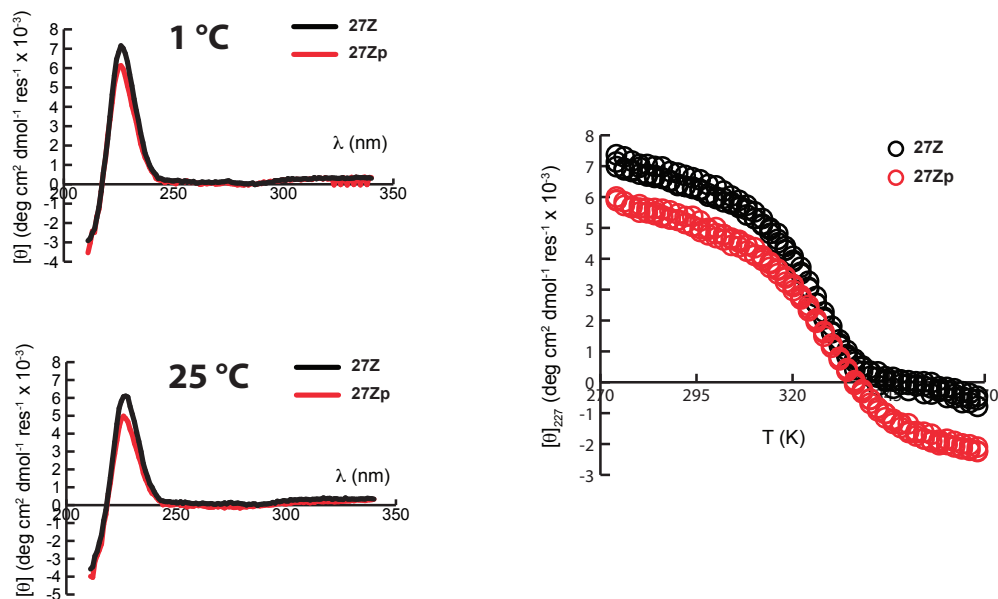

| Peptide     | $T_m$ / K       | $\Delta H(T_m)$ / kcal mol <sup>-1</sup> | $\Delta C_p$ / kcal mol <sup>-1</sup> K <sup>-1</sup> | $R^2$  | rmsd error |
|-------------|-----------------|------------------------------------------|-------------------------------------------------------|--------|------------|
| <b>27Z</b>  | $325.1 \pm 0.2$ | $-37.5 \pm 0.9$                          | $-0.98 \pm 0.06$                                      | 0.9997 | 0.058      |
| <b>27Zp</b> | $331.6 \pm 0.1$ | $-26.7 \pm 0.3$                          | -                                                     | 0.9997 | 0.057      |

**Figure S105.** CD spectra (50  $\mu$ M) and variable temperature CD data (50  $\mu$ M) for WW variants **27Z** (black) and **27Zp** (red) in 20 mM sodium phosphate, pH 7. Fit parameters appear in the table, along with standard errors.

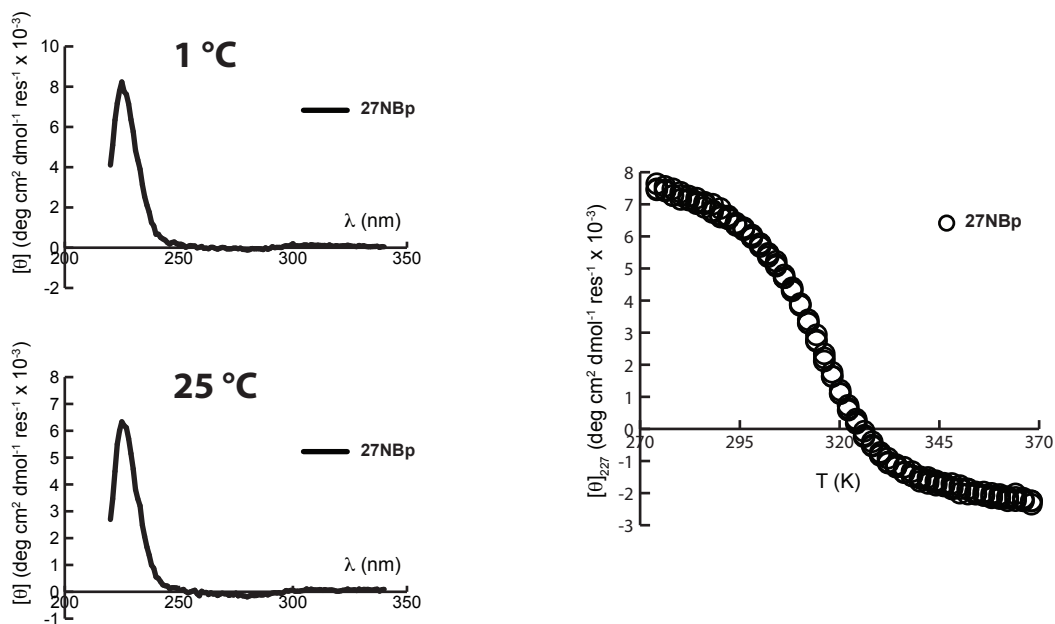

| Peptide      | $T_m$             | $\Delta H(T_m)$   | $\Delta C_p$     | $R^2$   | rmsd error |
|--------------|-------------------|-------------------|------------------|---------|------------|
| <b>27NBp</b> | $314.65 \pm 0.35$ | $-26.04 \pm 0.66$ | $-0.53 \pm 0.08$ | 0.99993 | 0.03582    |

**Figure S106.** CD spectra (50  $\mu$ M) and variable temperature CD data (50  $\mu$ M) for WW variant **27NBp** in 20 mM sodium phosphate, pH 7. Fit parameters appear in the table, along with standard errors.

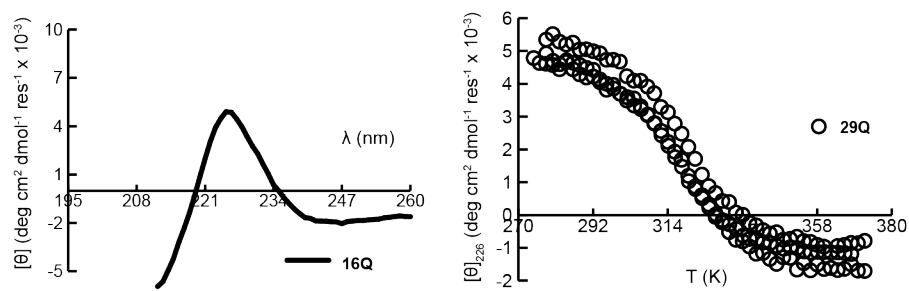

| Protien | Tm          | $\Delta H(T_m)$ | R <sup>2</sup> | rmsd error |
|---------|-------------|-----------------|----------------|------------|
| 29Q     | 318.4 ± 0.5 | -23.9 ± 0.7     | 0.9993         | 0.0843     |

**Figure S107.** CD spectra (50  $\mu$ M) and variable temperature CD data (50  $\mu$ M) for WW variant **29Q** in 20 mM sodium phosphate, pH 7. Fit parameters appear in the table, along with standard errors.

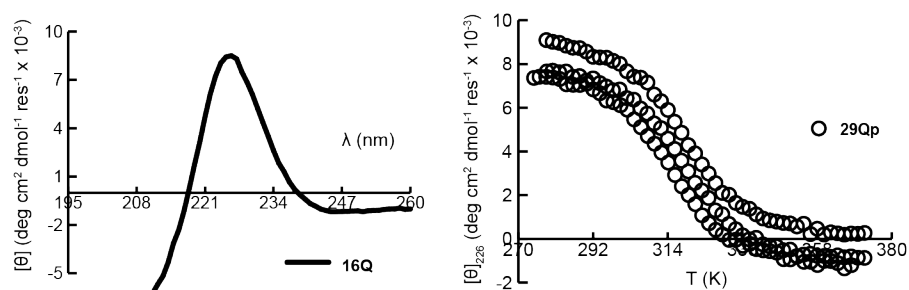

| Protien | Tm          | $\Delta H(T_m)$ | R <sup>2</sup> | rmsd error |
|---------|-------------|-----------------|----------------|------------|
| 29Qp    | 318.4 ± 0.5 | -23.9 ± 0.7     | 0.9997         | 0.0864     |

**Figure S108.** CD spectra (50  $\mu$ M) and variable temperature CD data (50  $\mu$ M) for WW variant **29Qp** in 20 mM sodium phosphate, pH 7. Fit parameters appear in the table, along with standard errors.

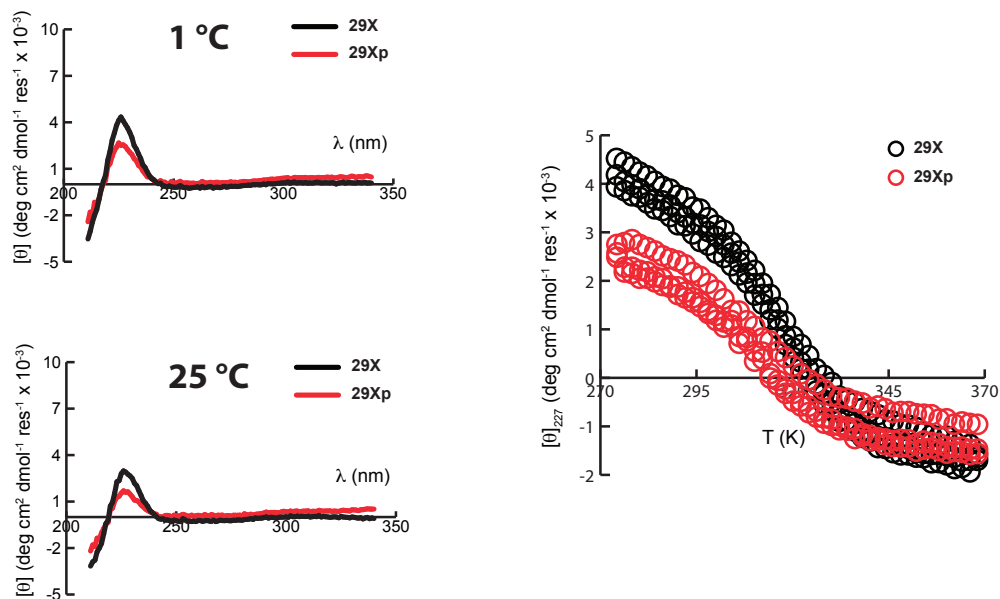

| Peptide     | $T_m / K$       | $\Delta H(T_m) / \text{kcal mol}^{-1}$ | $\Delta C_p / \text{kcal mol}^{-1} K^{-1}$ | $R^2$  | rmsd error |
|-------------|-----------------|----------------------------------------|--------------------------------------------|--------|------------|
| <b>29X</b>  | $320.7 \pm 0.1$ | $-26.1 \pm 0.3$                        |                                            | 0.9996 | 0.046      |
| <b>29Xp</b> | $315.7 \pm 0.6$ | $-24.8 \pm 1.4$                        |                                            | 0.9986 | 0.056      |

**Figure S109.** CD spectra (50  $\mu\text{M}$ ) and variable temperature CD data (50  $\mu\text{M}$ ) for WW variants **29X** (black) and **29Xp** (red) in 20 mM sodium phosphate, pH 7. Fit parameters appear in the table, along with standard errors.

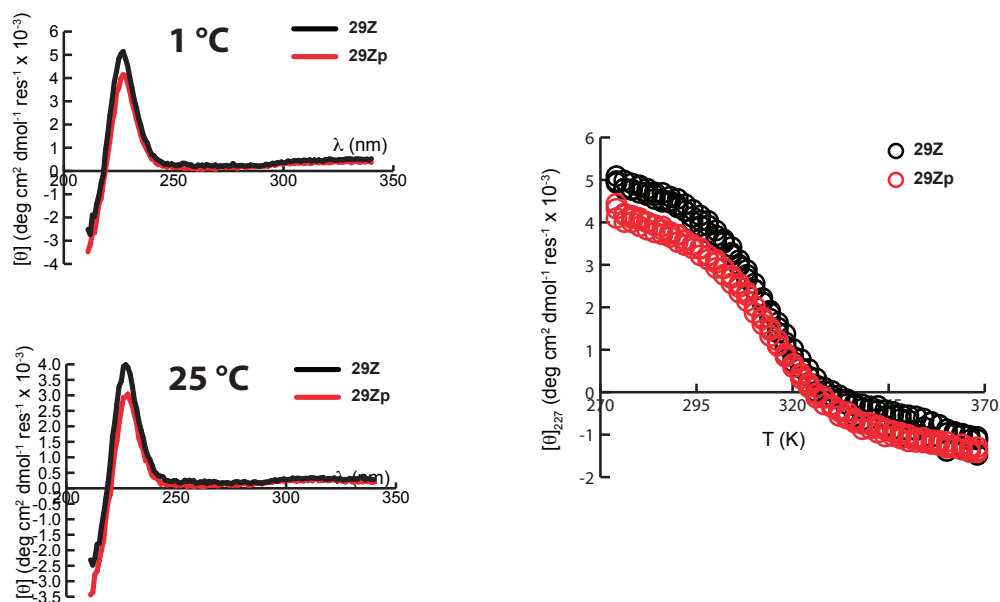

| Peptide     | $T_m / K$       | $\Delta H(T_m) / \text{kcal mol}^{-1}$ | $\Delta C_p / \text{kcal mol}^{-1} K^{-1}$ | $R^2$  | rmsd error |
|-------------|-----------------|----------------------------------------|--------------------------------------------|--------|------------|
| <b>29Z</b>  | $312.5 \pm 0.4$ | $-27.8 \pm 1.1$                        | $-0.92 \pm 0.08$                           | 0.9996 | 0.052      |
| <b>29Zp</b> | $316.3 \pm 0.2$ | $-26.2 \pm 0.5$                        | -                                          | 0.9998 | 0.033      |

**Figure S110.** CD spectra (50  $\mu\text{M}$ ) and variable temperature CD data (50  $\mu\text{M}$ ) for WW variants **29Z** (black) and **29Zp** (red) in 20 mM sodium phosphate, pH 7. Fit parameters appear in the table, along with standard errors.



| Protein | $T_m$ (K)       | $\Delta H(T_m)$ (kcal/mol) | $\Delta C_p$ (kcal/mol/K) | $R^2$  | std error |
|---------|-----------------|----------------------------|---------------------------|--------|-----------|
| 23NBp   | $298.0 \pm 0.3$ | $-20.3 \pm 0.5$            | $0.59 \pm 0.04$           | 0.9997 | 0.025     |

**Figure S111.** CD spectra (50  $\mu$ M) and variable temperature CD data (50  $\mu$ M) for WW variant **29NBp** in 20 mM sodium phosphate, pH 7. Fit parameters appear in the table, along with standard errors.

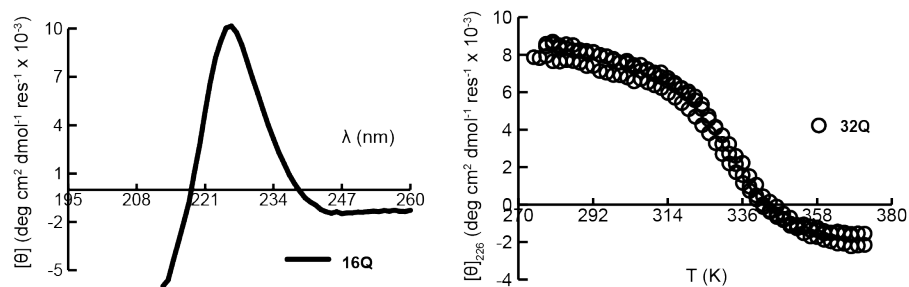

| Protien | $T_m$           | $\Delta H(T_m)$ | $R^2$  | rmsd error |
|---------|-----------------|-----------------|--------|------------|
| 32Q     | $331.5 \pm 0.2$ | $-28.8 \pm 0.5$ | 0.9996 | 0.09997    |

**Figure S112.** CD spectra (50  $\mu$ M) and variable temperature CD data (50  $\mu$ M) for WW variant **32Q** in 20 mM sodium phosphate, pH 7. Fit parameters appear in the table, along with standard errors.

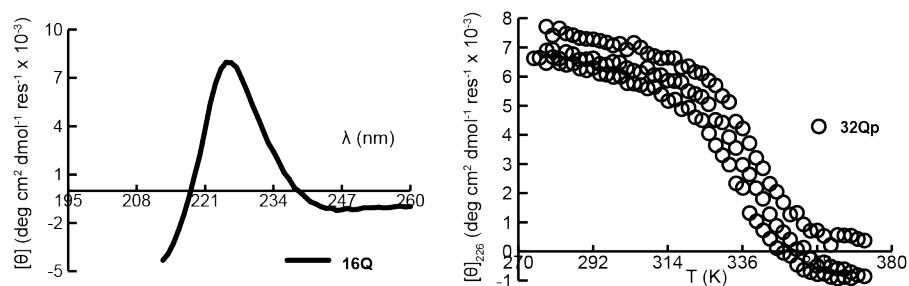

| Protien | T <sub>m</sub> | ΔH(T <sub>m</sub> ) | R <sup>2</sup> | rmsd error |
|---------|----------------|---------------------|----------------|------------|
| 32Qp    | 336.1 ± 0.2    | -32.4 ± 0.7         | 0.9996         | 0.09554    |

**Figure S113.** CD spectra (50 μM) and variable temperature CD data (50 μM) for WW variant **32Qp** in 20 mM sodium phosphate, pH 7. Fit parameters appear in the table, along with standard errors.

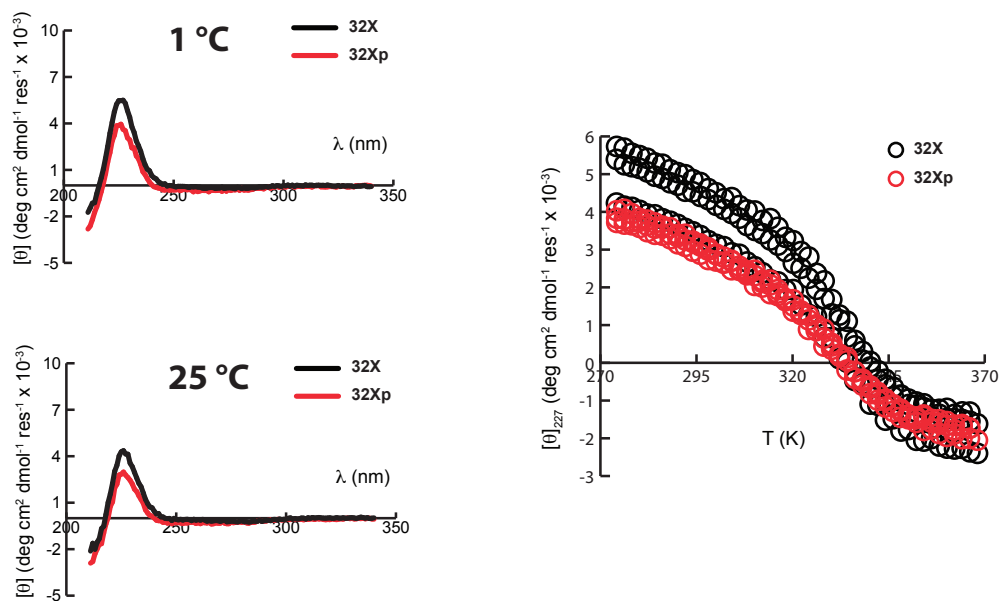

| Peptide     | T <sub>m</sub> /K | ΔH(T <sub>m</sub> ) / kcal mol <sup>-1</sup> | ΔC <sub>p</sub> / kcal mol <sup>-1</sup> K <sup>-1</sup> | R <sup>2</sup> | rmsd error |
|-------------|-------------------|----------------------------------------------|----------------------------------------------------------|----------------|------------|
| <b>32X</b>  | 333.4 ± 0.3       | -31.9 ± 1.3                                  | -0.69 ± 0.07                                             | 0.9995         | 0.063      |
| <b>32Xp</b> | 333.0 ± 0.5       | -28.0 ± 1.7                                  | -0.66 0.07                                               | 0.9995         | 0.057      |

**Figure S114.** CD spectra (50 μM) and variable temperature CD data (50 μM) for WW variants **32X** (black) and **32Xp** (red) in 20 mM sodium phosphate, pH 7. Fit parameters appear in the table, along with standard errors.

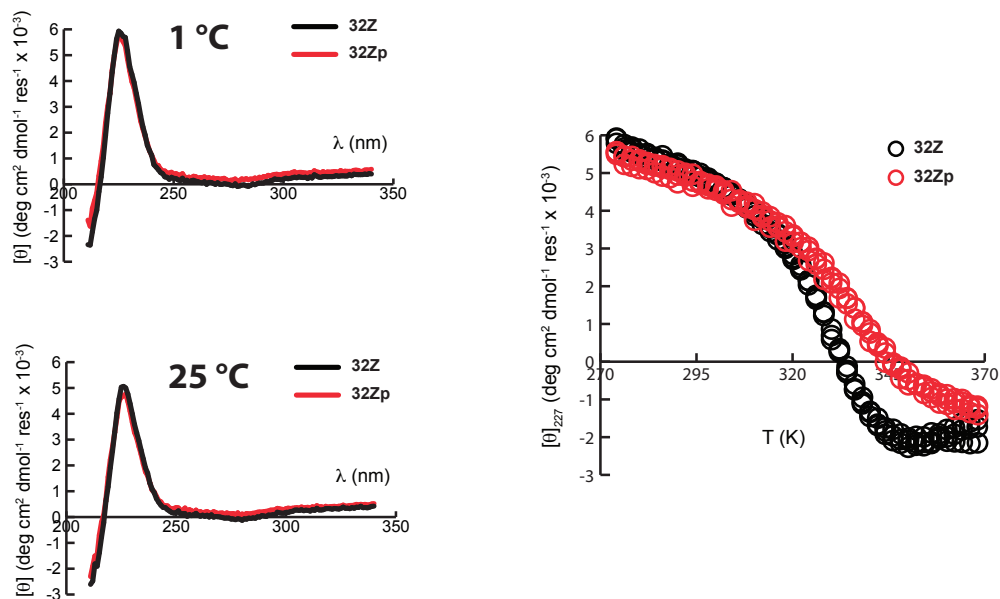

| Peptide     | $T_m$ / K       | $\Delta H(T_m)$ / kcal mol <sup>-1</sup> | $\Delta C_p$ / kcal mol <sup>-1</sup> K <sup>-1</sup> | $R^2$  | rmsd error |
|-------------|-----------------|------------------------------------------|-------------------------------------------------------|--------|------------|
| <b>32Z</b>  | $331.9 \pm 0.2$ | $-31.5 \pm 0.8$                          | $-0.66 \pm 0.05$                                      | 0.9996 | 0.070      |
| <b>32Zp</b> | $336.6 \pm 0.3$ | $-23.5 \pm 0.6$                          | $-0.41 \pm 0.05$                                      | 0.9993 | 0.062      |

**Figure S115.** CD spectra (50  $\mu$ M) and variable temperature CD data (50  $\mu$ M) for WW variants **32Z** (black) and **32Zp** (red) in 20 mM sodium phosphate, pH 7. Fit parameters appear in the table, along with standard errors.

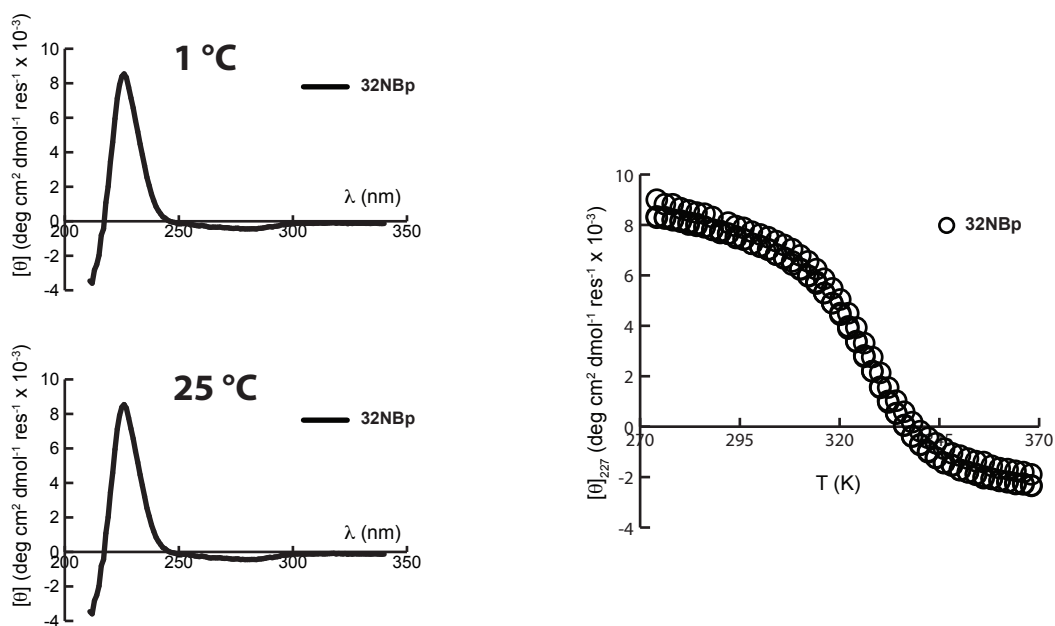

| Peptide      | $T_m$             | $\Delta H(T_m)$   | $\Delta C_p$     | $R^2$   | rmsd error |
|--------------|-------------------|-------------------|------------------|---------|------------|
| <b>32NBp</b> | $327.37 \pm 0.39$ | $-30.35 \pm 0.42$ | $-0.32 \pm 0.12$ | 0.99988 | 0.05042    |

**Figure S116.** CD spectra (50  $\mu$ M) and variable temperature CD data (50  $\mu$ M) for WW variant **32NBp** in 20 mM sodium phosphate, pH 7. Fit parameters appear in the table, along with standard errors.

### 3. Proteolysis Experiments

50  $\mu\text{M}$  solutions of PEGylated WW variants or their non-PEGylated counterparts in 20 mM sodium phosphate buffer (pH 7) were incubated at ambient temperature with 17  $\mu\text{g}/\text{mL}$  proteinase K for up to 90 minutes. At regular time points, a 50  $\mu\text{L}$  aliquot of the reaction mixture was quenched by addition of 150  $\mu\text{L}$  of a 1% solution (v/v) of trifluoroacetic acid in water. Each quenched aliquot was then analyzed in triplicate by analytical reverse-phase HPLC, using a UV-Vis detector at 220 nm. The amount of each full-length WW variant remaining in solution at each time point was assessed by integrated peak area, expressed as the remaining percentage of the integrated peak area from a control solution that contained no protease. The apparent proteolysis rate constant  $k$  (in units of  $\text{s}^{-1}$ ) for each WW variant was calculated by fitting the % area vs. time data to an equation for monoexponential decay by least-squares regression:

$$\text{Area}(t) = A_0 \exp [-k t],$$

where  $t$  is time (in units of s),  $A_0$  is a constant corresponding to % area at  $t = 0$  s. The apparent proteolysis rate constant  $k$  for each variant is inversely related to half-life ( $t_{1/2}$ , in units of s) according to the following relationship:  $t_{1/2} = (\ln 2)/k$ ; smaller values of  $k$  are correlated with longer half-lives. Plots of % area vs. time data and the resulting fits for the WW variants explored here are shown in Figures S117– S178. Apparent rate constants for each variant are shown in the main text. Proteolysis experiments for linear Asn-PEGylated variants and their non-PEGylated counterparts in the presence of proteinase K were reported previously<sup>1</sup>, but were performed again here to account for the increased proteinase K concentration employed here relative to what we used previously.



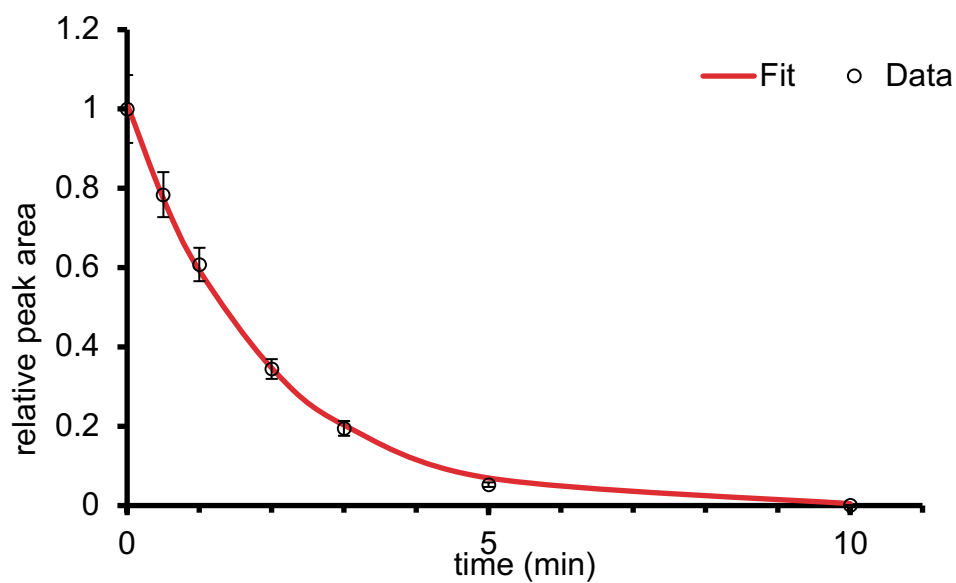

**Figure S117. ( $t_{1/2} = 1.29 \pm 0.03$  min)** Proteolysis of **16Q** (50  $\mu$ M protein concentration in 20 mM sodium phosphate buffer, pH 7) by proteinase K (10 mg/mL), as monitored by HPLC. Data points are shown as black circles with error bars, and each represents the average of three replicate experiments. The solid red line represents the fit of the data to a monoexponential decay function, which was used to calculate the indicated half-lives.

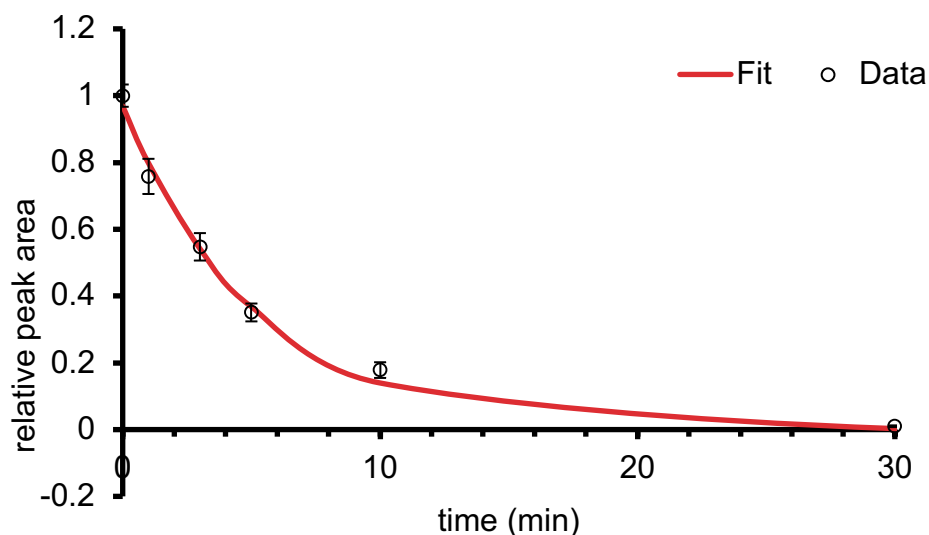

**Figure S118. ( $t_{1/2} = 3.58 \pm 0.22$  min)** Proteolysis of **16Qp** (50  $\mu$ M protein concentration in 20 mM sodium phosphate buffer, pH 7) by proteinase K (10 mg/mL), as monitored by HPLC. Data points are shown as black circles with error bars, and each represents the average of three replicate experiments. The solid red line represents the fit of the data to a monoexponential decay function, which was used to calculate the indicated half-lives.

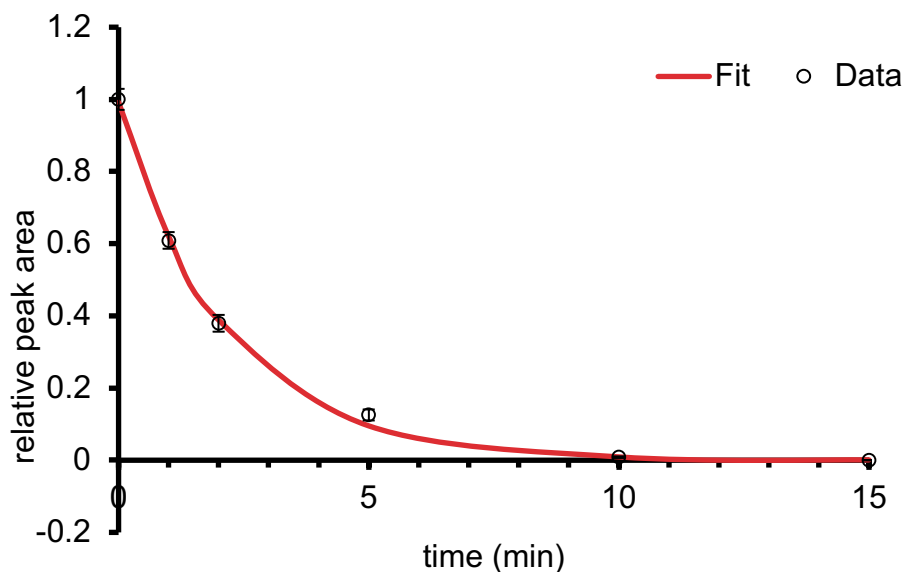

**Figure S119.** ( $t_{1/2} = 1.48 \pm 0.08$  min) Proteolysis of **18Q** (50  $\mu$ M protein concentration in 20 mM sodium phosphate buffer, pH 7) by proteinase K (10 mg/mL), as monitored by HPLC. Data points are shown as black circles with error bars, and each represents the average of three replicate experiments. The solid red line represents the fit of the data to a monoexponential decay function, which was used to calculate the indicated half-lives.

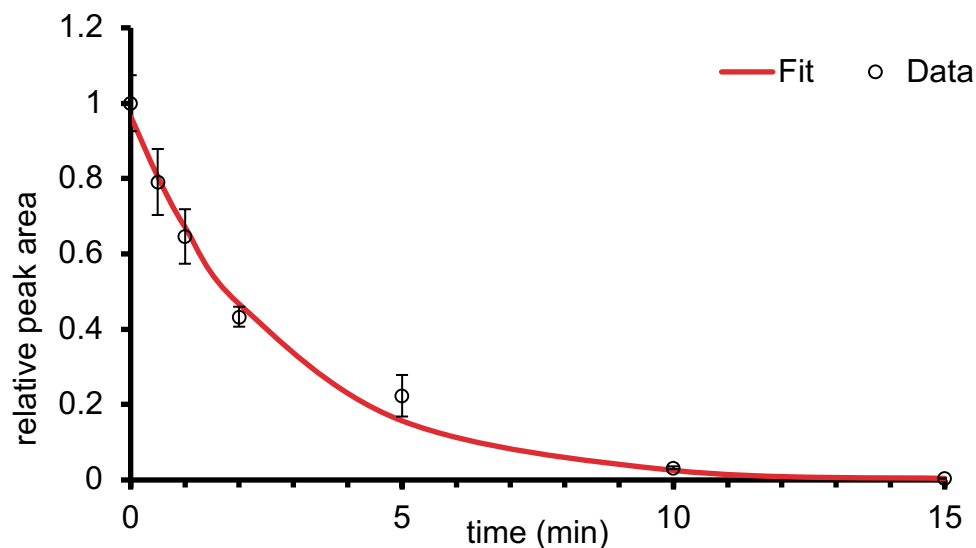

**Figure S120.** ( $t_{1/2} = 1.91 \pm 0.17$  min) Proteolysis of **18Qp** (50  $\mu$ M protein concentration in 20 mM sodium phosphate buffer, pH 7) by proteinase K (10 mg/mL), as monitored by HPLC. Data points are shown as black circles with error bars, and each represents the average of three replicate experiments. The solid red line represents the fit of the data to a monoexponential decay function, which was used to calculate the indicated half-lives.

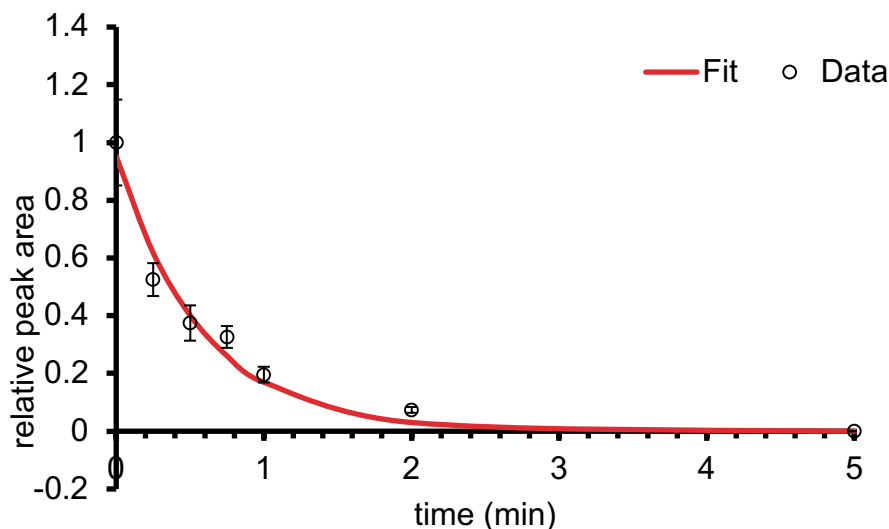

**Figure S121.** ( $t_{1/2} = 0.40 \pm 0.04$  min) Proteolysis of **19Q** (50  $\mu$ M protein concentration in 20 mM sodium phosphate buffer, pH 7) by proteinase K (10 mg/mL), as monitored by HPLC. Data points are shown as black circles with error bars, and each represents the average of three replicate experiments. The solid red line represents the fit of the data to a monoexponential decay function, which was used to calculate the indicated half-lives.

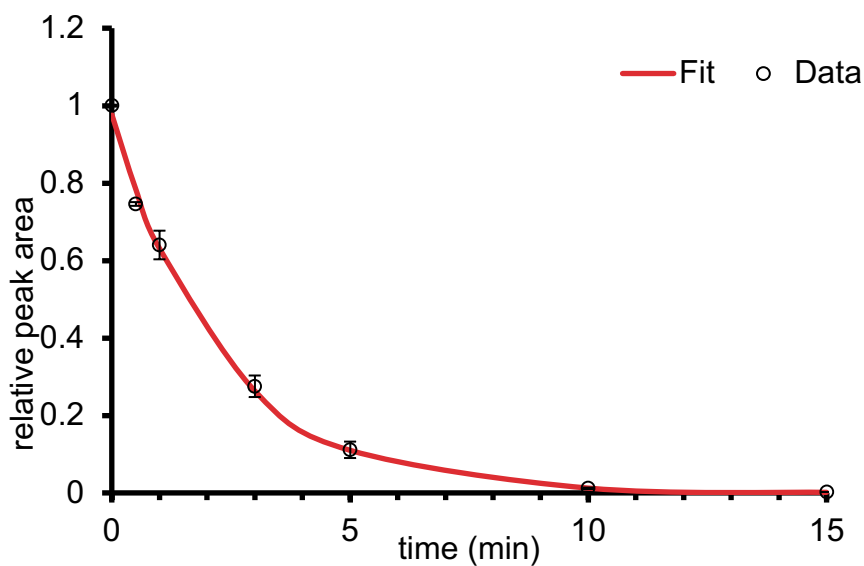

**Figure S122.** ( $t_{1/2} = 1.59 \pm 0.08$  min) Proteolysis of **19Qp** (50  $\mu$ M protein concentration in 20 mM sodium phosphate buffer, pH 7) by proteinase K (10 mg/mL), as monitored by HPLC. Data points are shown as black circles with error bars, and each represents the average of three replicate experiments. The solid red line represents the fit of the data to a monoexponential decay function, which was used to calculate the indicated half-lives.

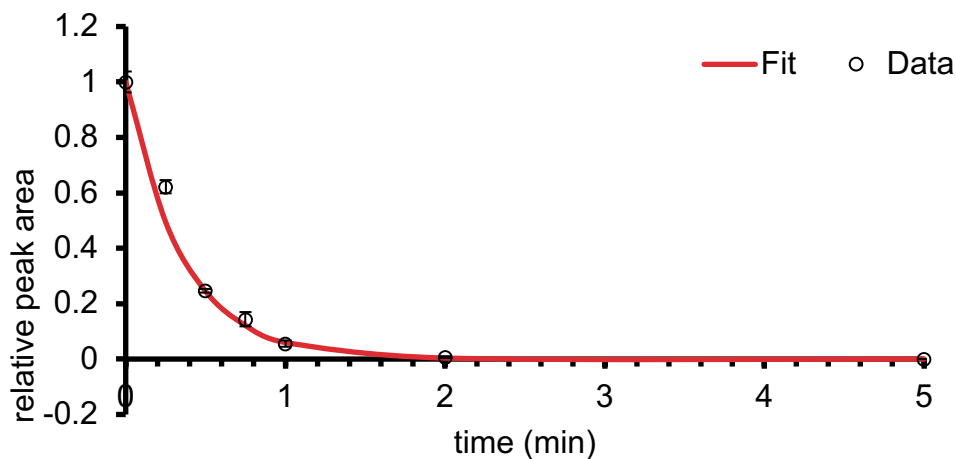

**Figure S123. ( $t_{1/2} = 0.25 \pm 0.03$  min)** Proteolysis of **23Q** (50  $\mu$ M protein concentration in 20 mM sodium phosphate buffer, pH 7) by proteinase K (10 mg/mL), as monitored by HPLC. Data points are shown as black circles with error bars, and each represents the average of three replicate experiments. The solid red line represents the fit of the data to a monoexponential decay function, which was used to calculate the indicated half-lives.

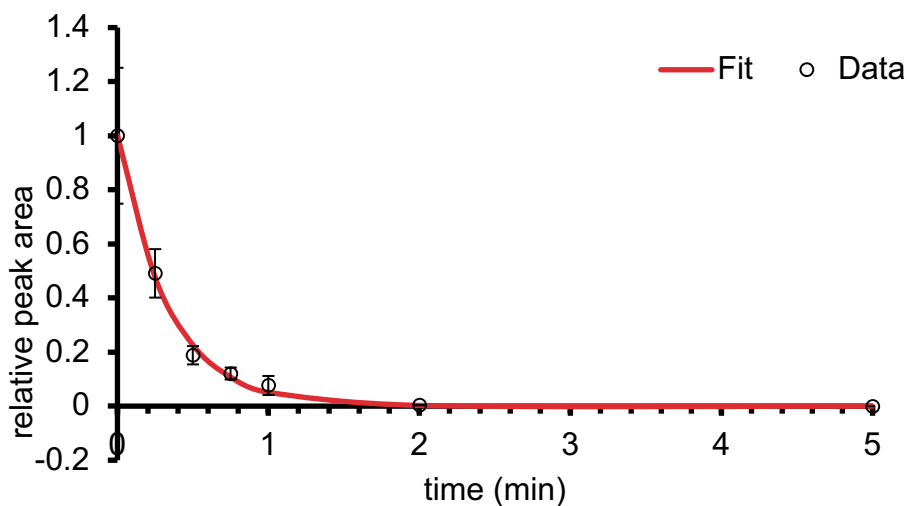

**Figure S124. ( $t_{1/2} = 0.23 \pm 0.01$  min)** Proteolysis of **23Qp** (50  $\mu$ M protein concentration in 20 mM sodium phosphate buffer, pH 7) by proteinase K (10 mg/mL), as monitored by HPLC. Data points are shown as black circles with error bars, and each represents the average of three replicate experiments. The solid red line represents the fit of the data to a monoexponential decay function, which was used to calculate the indicated half-lives.

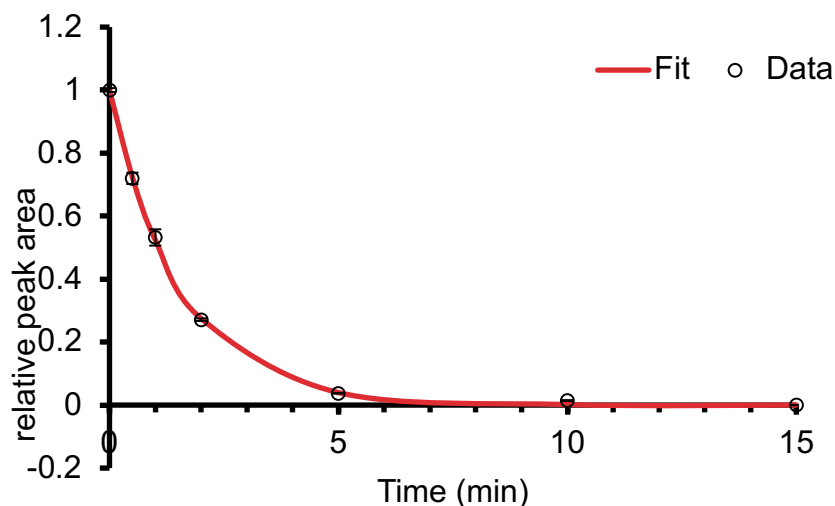

**Figure S125. ( $t_{1/2} = 1.07 \pm 0.02$  min)** Proteolysis of **27Q** (50  $\mu$ M protein concentration in 20 mM sodium phosphate buffer, pH 7) by proteinase K (10 mg/mL), as monitored by HPLC. Data points are shown as black circles with error bars, and each represents the average of three replicate experiments. The solid red line represents the fit of the data to a monoexponential decay function, which was used to calculate the indicated half-lives.

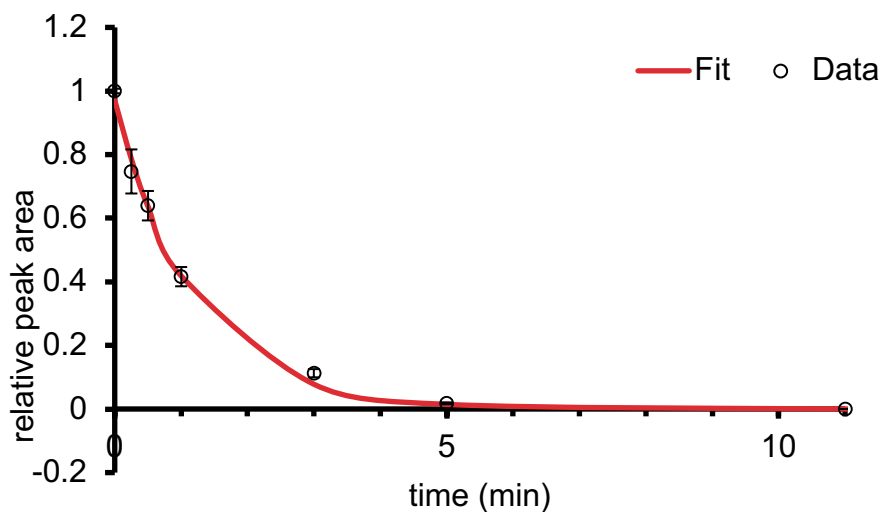

**Figure S126. ( $t_{1/2} = 0.82 \pm 0.05$  min)** Proteolysis of **27Qp** (50  $\mu$ M protein concentration in 20 mM sodium phosphate buffer, pH 7) by proteinase K (10 mg/mL), as monitored by HPLC. Data points are shown as black circles with error bars, and each represents the average of three replicate experiments. The solid red line represents the fit of the data to a monoexponential decay function, which was used to calculate the indicated half-lives.

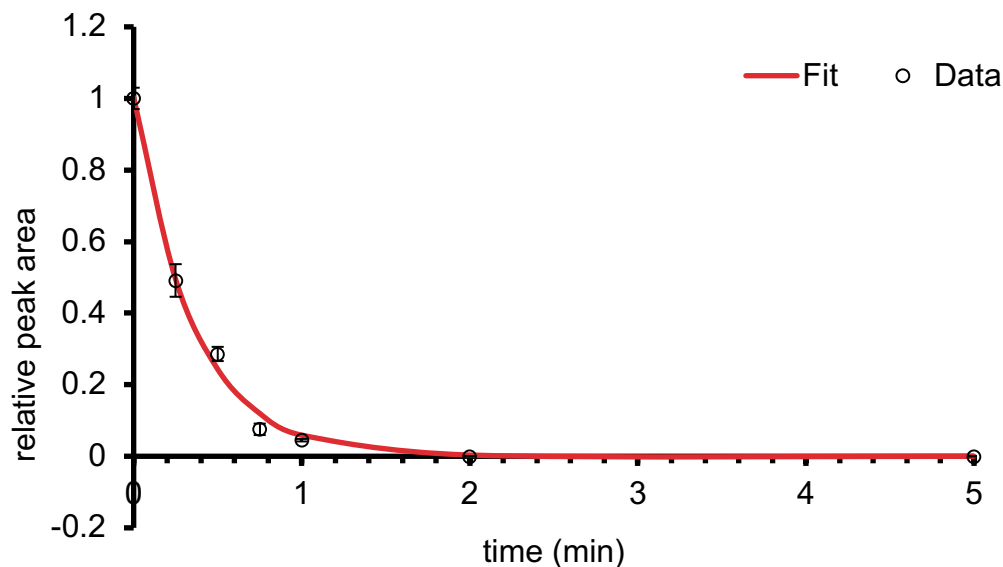

**Figure S127. ( $t_{1/2} = 0.24 \pm 0.01$  min)** Proteolysis of **29Q** (50  $\mu$ M protein concentration in 20 mM sodium phosphate buffer, pH 7) by proteinase K (10 mg/mL), as monitored by HPLC. Data points are shown as black circles with error bars, and each represents the average of three replicate experiments. The solid red line represents the fit of the data to a monoexponential decay function, which was used to calculate the indicated half-lives.

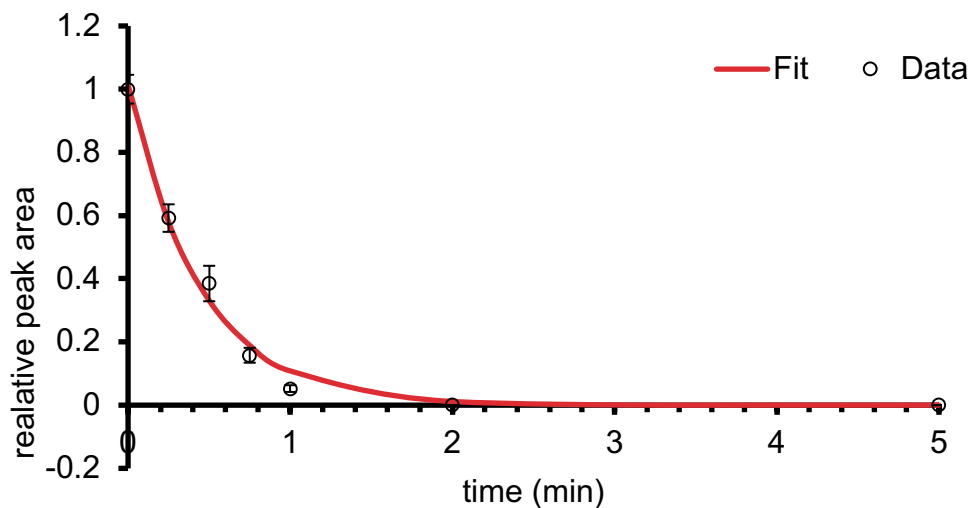

**Figure S128. ( $t_{1/2} = 0.31 \pm 0.02$  min)** Proteolysis of **29Qp** (50  $\mu$ M protein concentration in 20 mM sodium phosphate buffer, pH 7) by proteinase K (10 mg/mL), as monitored by HPLC. Data points are shown as black circles with error bars, and each represents the average of three replicate experiments. The solid red line represents the fit of the data to a monoexponential decay function, which was used to calculate the indicated half-lives.

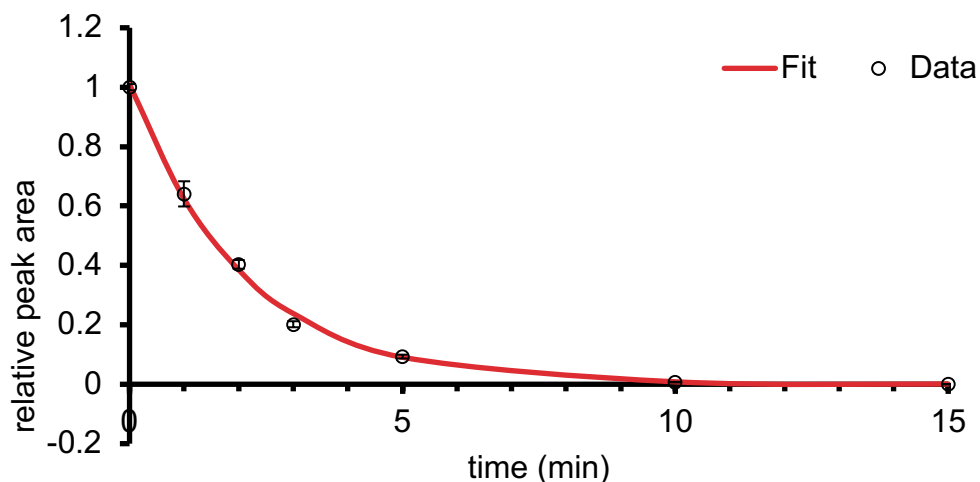

**Figure S129. ( $t_{1/2} = 1.44 \pm 0.05$  min)** Proteolysis of **32Q** (50  $\mu$ M protein concentration in 20 mM sodium phosphate buffer, pH 7) by proteinase K (10 mg/mL), as monitored by HPLC. Data points are shown as black circles with error bars, and each represents the average of three replicate experiments. The solid red line represents the fit of the data to a monoexponential decay function, which was used to calculate the indicated half-lives.

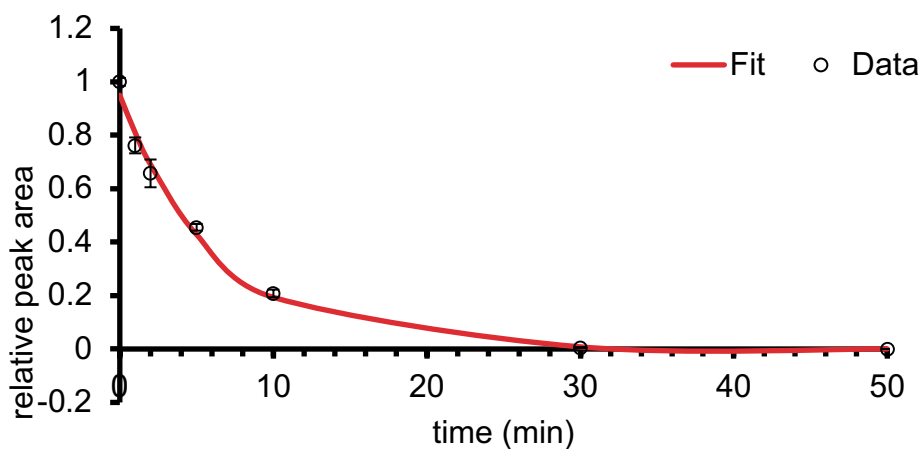

**Figure S130. ( $t_{1/2} = 4.36 \pm 0.38$  min)** Proteolysis of **32Qp** (50  $\mu$ M protein concentration in 20 mM sodium phosphate buffer, pH 7) by proteinase K (10 mg/mL), as monitored by HPLC. Data points are shown as black circles with error bars, and each represents the average of three replicate experiments. The solid red line represents the fit of the data to a monoexponential decay function, which was used to calculate the indicated half-lives.

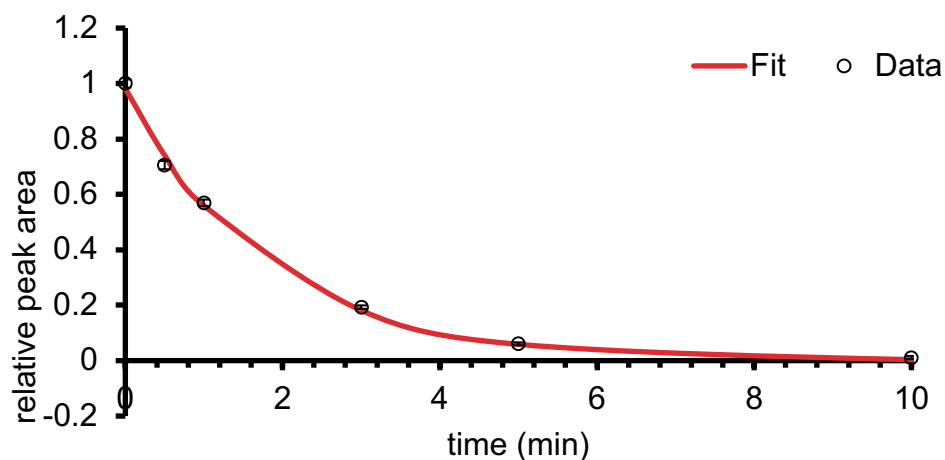

**Figure S131. ( $t_{1/2} = 1.23 \pm 0.06$  min)** Proteolysis of **16N** (50  $\mu$ M protein concentration in 20 mM sodium phosphate buffer, pH 7) by proteinase K (10 mg/mL), as monitored by HPLC. Data points are shown as black circles with error bars, and each represents the average of three replicate experiments. The solid red line represents the fit of the data to a monoexponential decay function, which was used to calculate the indicated half-lives.

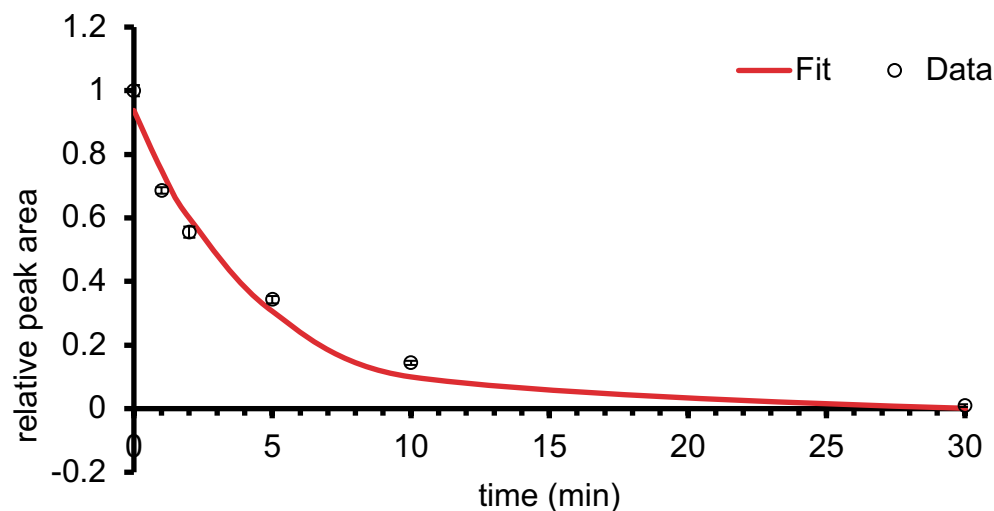

**Figure S132. ( $t_{1/2} = 3.09 \pm 0.38$  min)** Proteolysis of **16Np** (50  $\mu$ M protein concentration in 20 mM sodium phosphate buffer, pH 7) by proteinase K (10 mg/mL), as monitored by HPLC. Data points are shown as black circles with error bars, and each represents the average of three replicate experiments. The solid red line represents the fit of the data to a monoexponential decay function, which was used to calculate the indicated half-lives.



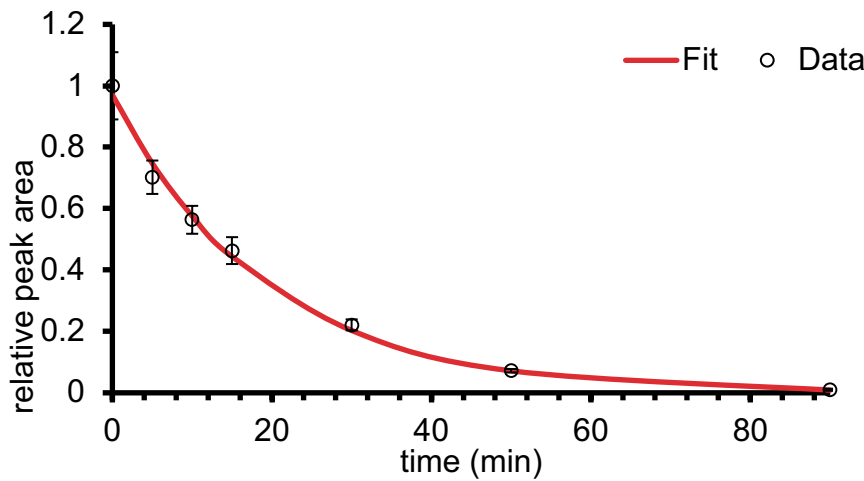

**Figure S133. ( $t_{1/2} = 13.30 \pm 0.75$  min)** Proteolysis of **16Nbp** (50  $\mu$ M protein concentration in 20 mM sodium phosphate buffer, pH 7) by proteinase K (10 mg/mL), as monitored by HPLC. Data points are shown as black circles with error bars, and each represents the average of three replicate experiments. The solid red line represents the fit of the data to a monoexponential decay function, which was used to calculate the indicated half-lives.

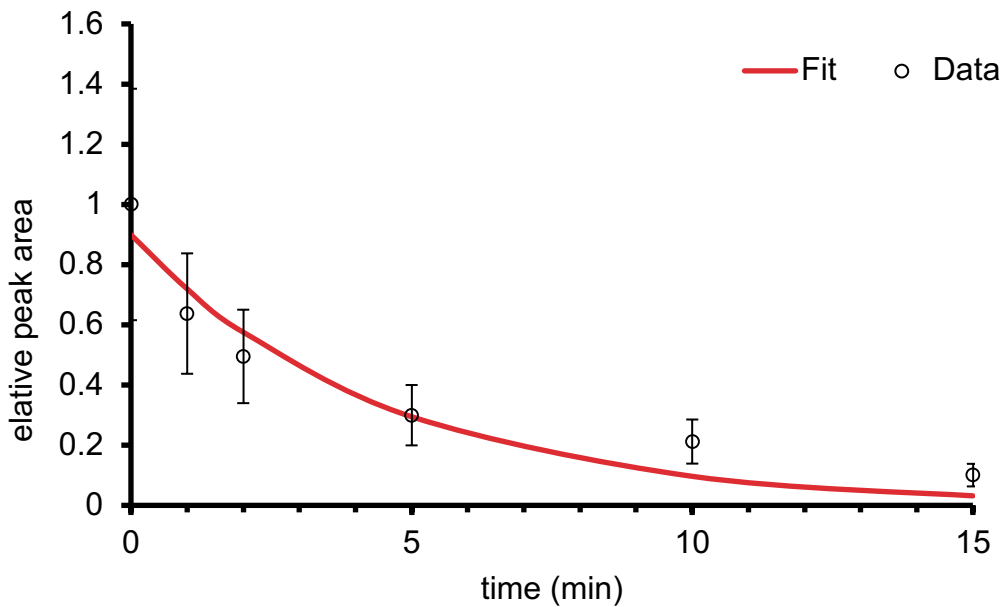

**Figure S134. ( $t_{1/2} = 3.11 \pm 0.88$  min)** Proteolysis of **18N** (50  $\mu$ M protein concentration in 20 mM sodium phosphate buffer, pH 7) by proteinase K (10 mg/mL), as monitored by HPLC. Data points are shown as black circles with error bars, and each represents the average of three replicate experiments. The solid red line represents the fit of the data to a monoexponential decay function, which was used to calculate the indicated half-lives.

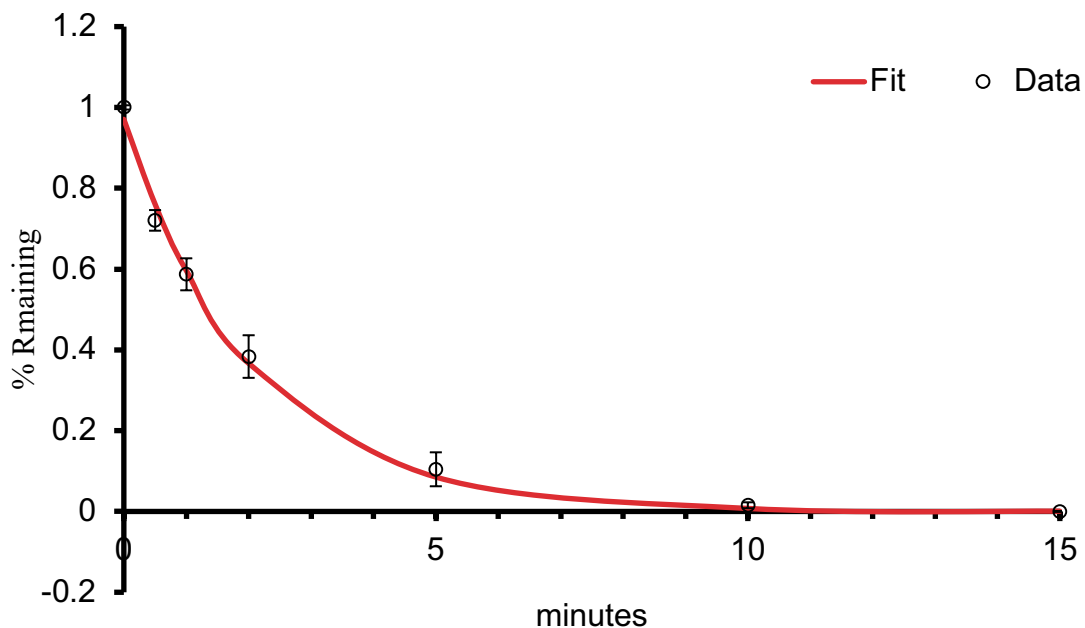

**Figure S135.** ( $t_{1/2} = \pm \text{min}$ ) Proteolysis of **18Np** (50  $\mu\text{M}$  protein concentration in 20 mM sodium phosphate buffer, pH 7) by proteinase K (10 mg/mL), as monitored by HPLC. Data points are shown as black circles with error bars, and each represents the average of three replicate experiments. The solid red line represents the fit of the data to a monoexponential decay function, which was used to calculate the indicated half-lives.

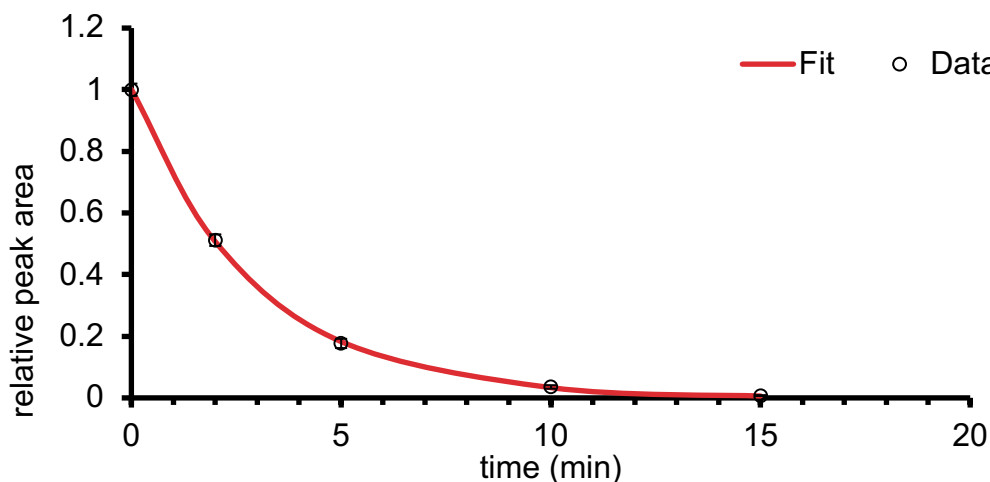

**Figure S136.** ( $t_{1/2} = \pm \text{min}$ ) Proteolysis of **18Nbp** (50  $\mu\text{M}$  protein concentration in 20 mM sodium phosphate buffer, pH 7) by proteinase K (10 mg/mL), as monitored by HPLC. Data points are shown as black circles with error bars, and each represents the average of three replicate experiments. The solid red line represents the fit of the data to a monoexponential decay function, which was used to calculate the indicated half-lives.

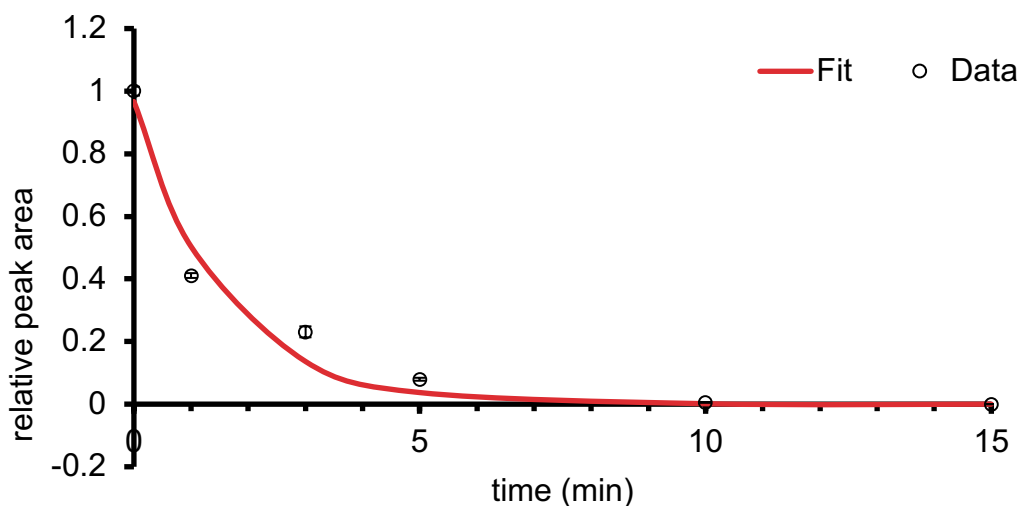

**Figure S137. ( $t_{1/2} = 1.06 \pm 0.19$  min)** Proteolysis of **19N** (50  $\mu$ M protein concentration in 20 mM sodium phosphate buffer, pH 7) by proteinase K (10 mg/mL), as monitored by HPLC. Data points are shown as black circles with error bars, and each represents the average of three replicate experiments. The solid red line represents the fit of the data to a monoexponential decay function, which was used to calculate the indicated half-lives.

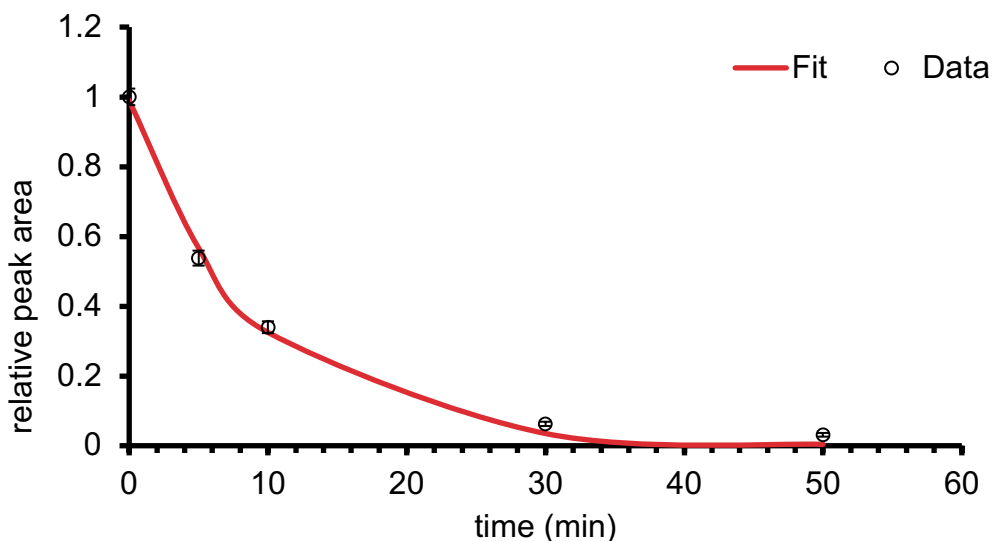

**Figure S138. ( $t_{1/2} = 6.22 \pm 0.44$  min)** Proteolysis of **19Np** (50  $\mu$ M protein concentration in 20 mM sodium phosphate buffer, pH 7) by proteinase K (10 mg/mL), as monitored by HPLC. Data points are shown as black circles with error bars, and each represents the average of three replicate experiments. The solid red line represents the fit of the data to a monoexponential decay function, which was used to calculate the indicated half-lives.

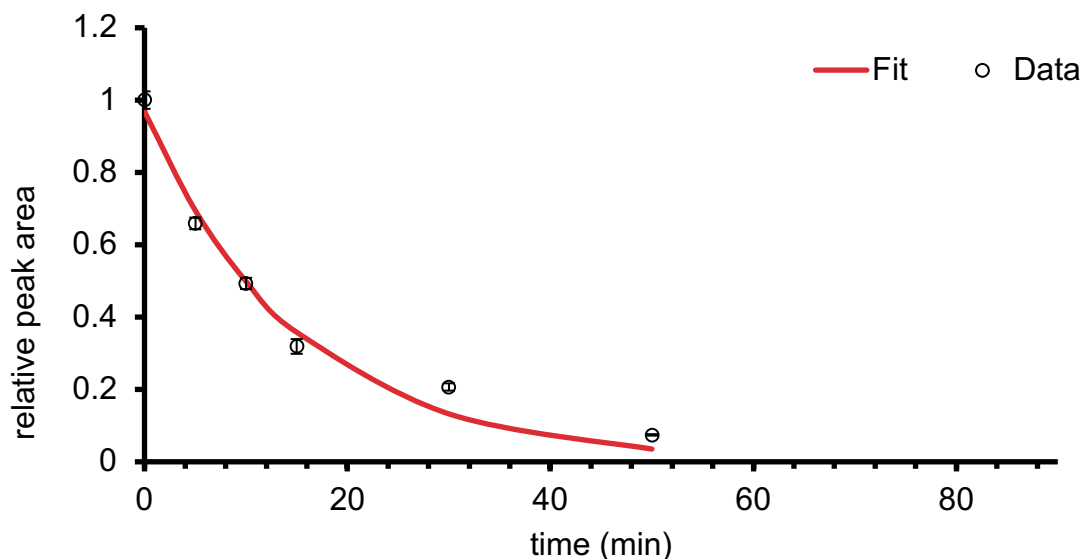

**Figure S139. ( $t_{1/2} = 10.45 \pm 1.12$  min)** Proteolysis of **19Nbp** (50  $\mu$ M protein concentration in 20 mM sodium phosphate buffer, pH 7) by proteinase K (10 mg/mL), as monitored by HPLC. Data points are shown as black circles with error bars, and each represents the average of three replicate experiments. The solid red line represents the fit of the data to a monoexponential decay function, which was used to calculate the indicated half-lives.

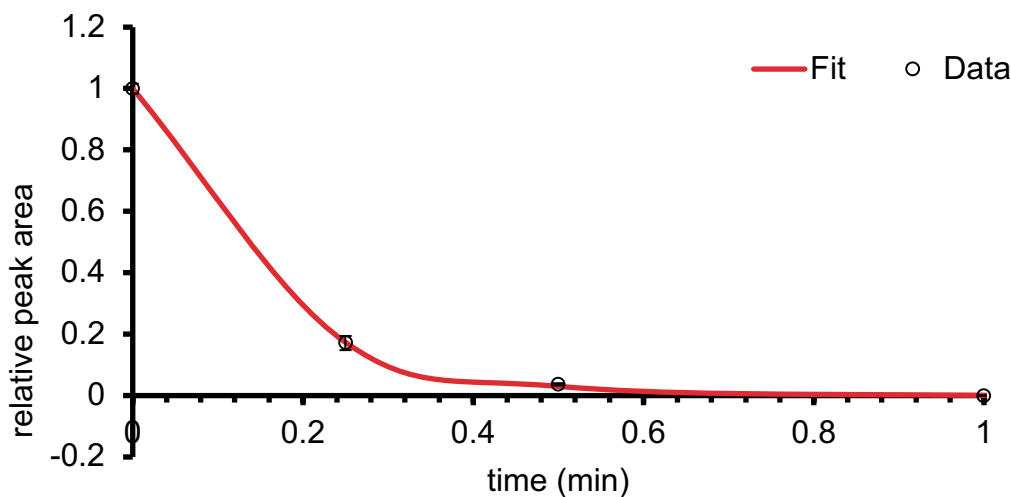

**Figure S140. ( $t_{1/2} = 0.010 \pm 0.001$  min)** Proteolysis of **23N** (50  $\mu$ M protein concentration in 20 mM sodium phosphate buffer, pH 7) by proteinase K (10 mg/mL), as monitored by HPLC. Data points are shown as black circles with error bars, and each represents the average of three replicate experiments. The solid red line represents the fit of the data to a monoexponential decay function, which was used to calculate the indicated half-lives.

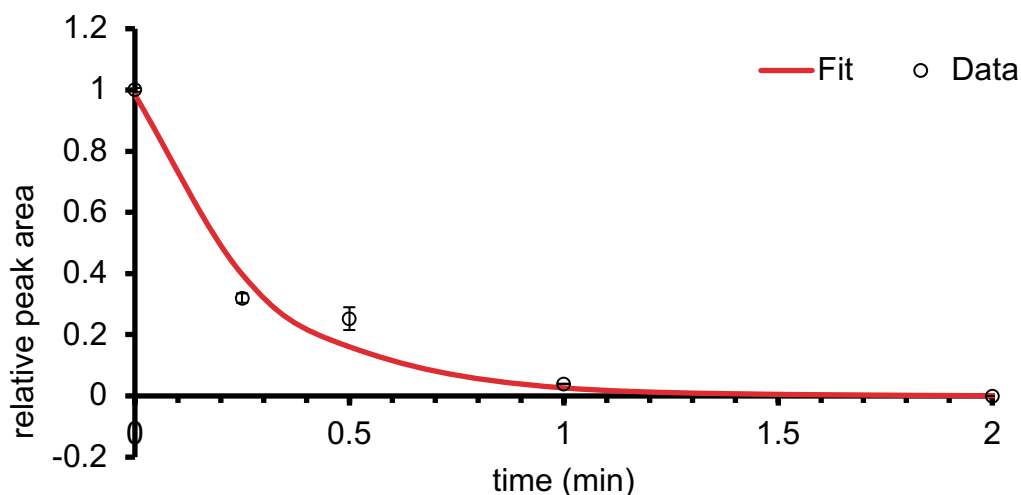

**Figure S141.** ( $t_{1/2} = 0.19 \pm 0.03$  min) Proteolysis of **23Np** (50  $\mu$ M protein concentration in 20 mM sodium phosphate buffer, pH 7) by proteinase K (10 mg/mL), as monitored by HPLC. Data points are shown as black circles with error bars, and each represents the average of three replicate experiments. The solid red line represents the fit of the data to a monoexponential decay function, which was used to calculate the indicated half-lives.

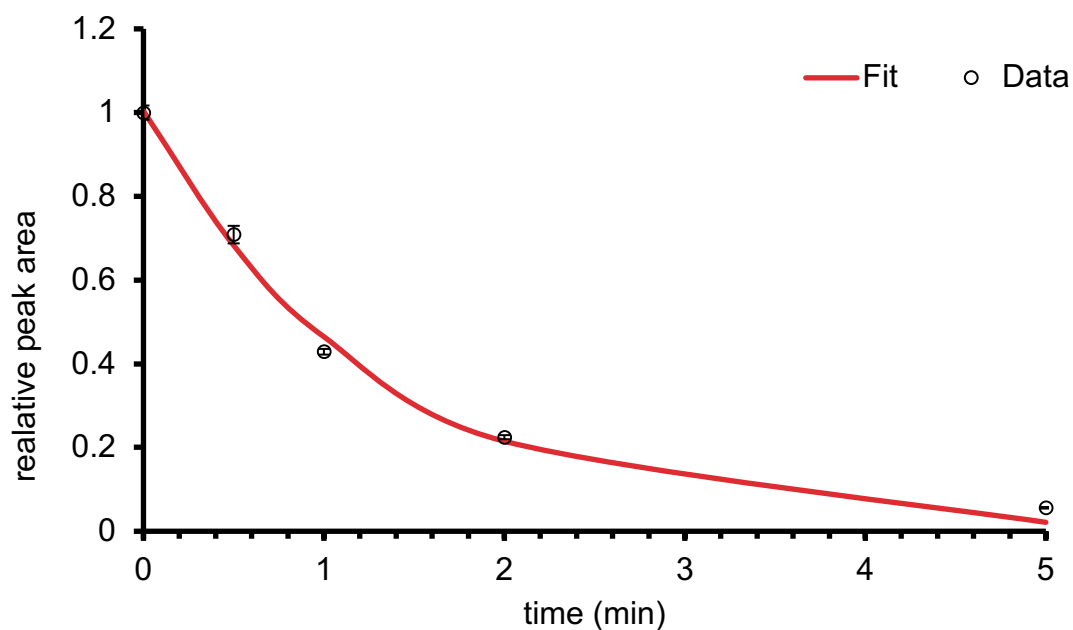

**Figure S142.** ( $t_{1/2} = 0.90 \pm 0.06$  min) Proteolysis of **23Nbp** (50  $\mu$ M protein concentration in 20 mM sodium phosphate buffer, pH 7) by proteinase K (10 mg/mL), as monitored by HPLC. Data points are shown as black circles with error bars, and each represents the average of three replicate experiments. The solid red line represents the fit of the data to a monoexponential decay function, which was used to calculate the indicated half-lives.

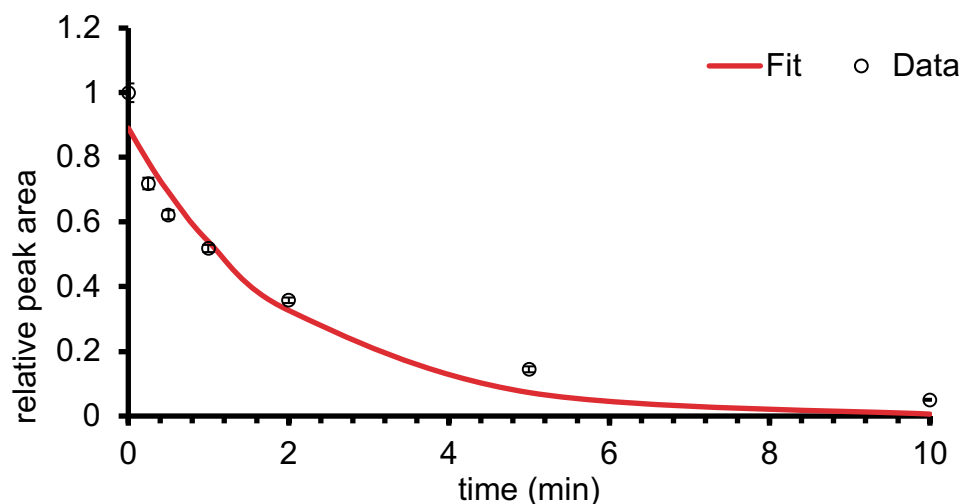

**Figure S143. ( $t_{1/2} = 1.38 \pm 0.30$  min)** Proteolysis of **27N** (50  $\mu$ M protein concentration in 20 mM sodium phosphate buffer, pH 7) by proteinase K (10 mg/mL), as monitored by HPLC. Data points are shown as black circles with error bars, and each represents the average of three replicate experiments. The solid red line represents the fit of the data to a monoexponential decay function, which was used to calculate the indicated half-lives.

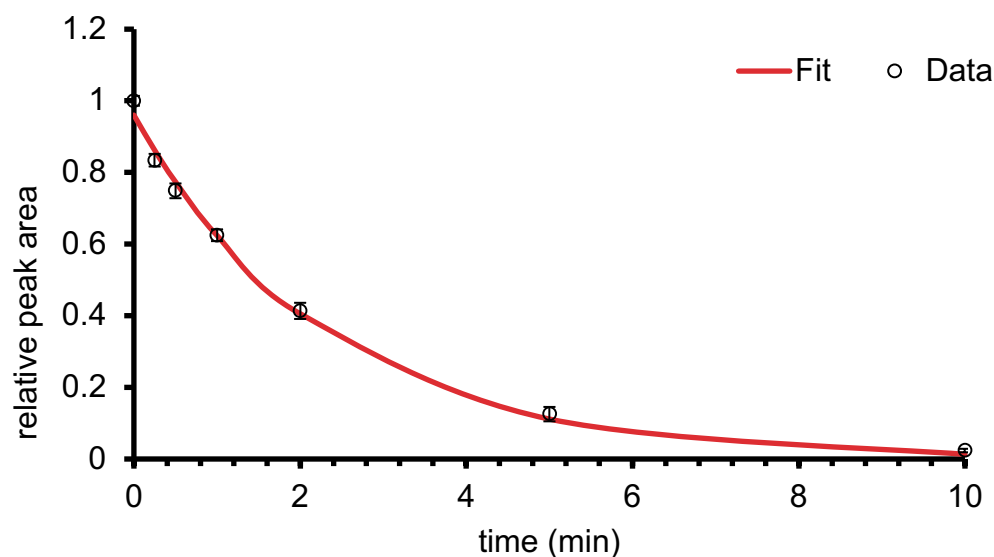

**Figure S144. ( $t_{1/2} = 1.61 \pm 0.11$  min)** Proteolysis of **27Np** (50  $\mu$ M protein concentration in 20 mM sodium phosphate buffer, pH 7) by proteinase K (10 mg/mL), as monitored by HPLC. Data points are shown as black circles with error bars, and each represents the average of three replicate experiments. The solid red line represents the fit of the data to a monoexponential decay function, which was used to calculate the indicated half-lives.

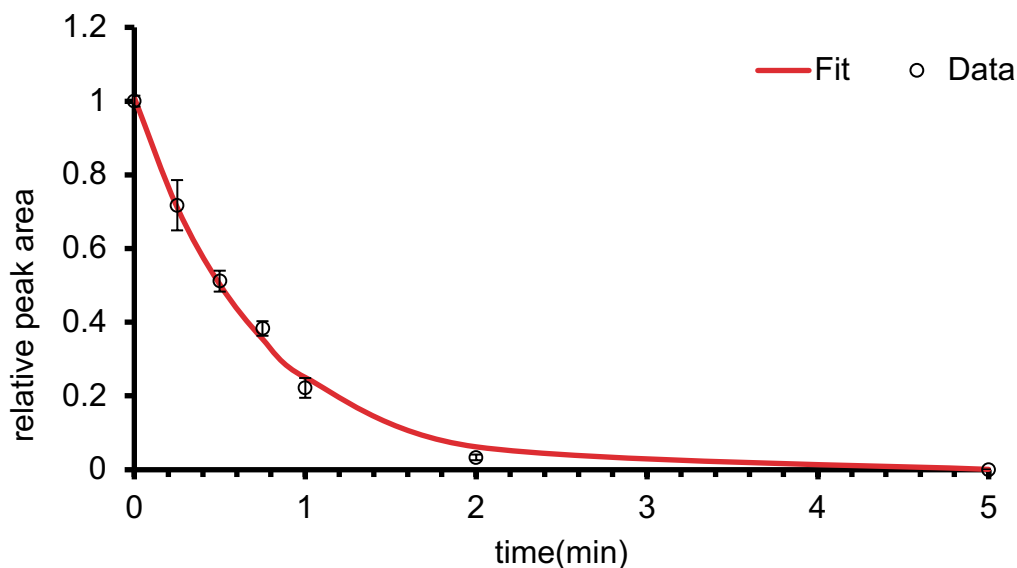

**Figure S145. ( $t_{1/2} = 0.50 \pm 0.02$  min)** Proteolysis of **27Nbp** (50  $\mu$ M protein concentration in 20 mM sodium phosphate buffer, pH 7) by proteinase K (10 mg/mL), as monitored by HPLC. Data points are shown as black circles with error bars, and each represents the average of three replicate experiments. The solid red line represents the fit of the data to a monoexponential decay function, which was used to calculate the indicated half-lives.

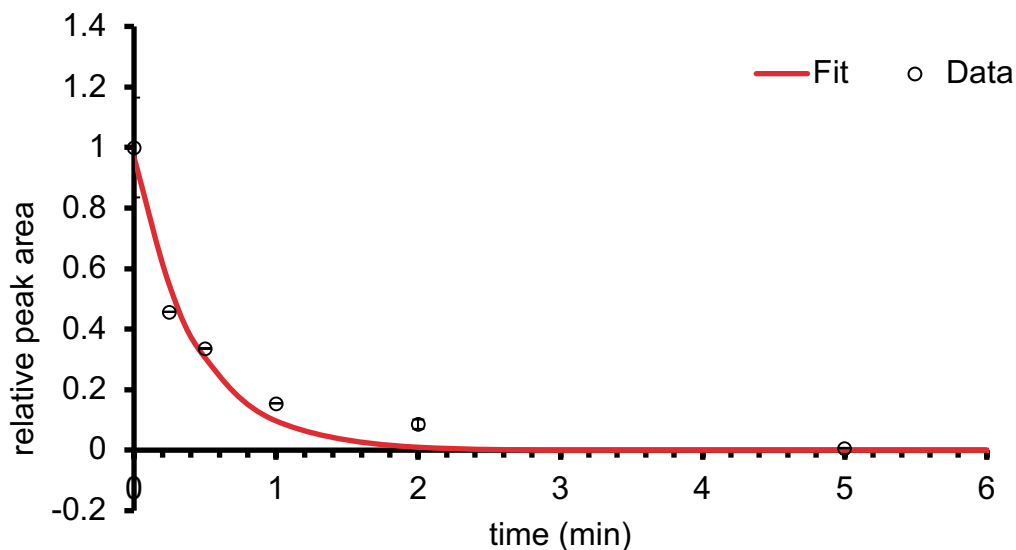

**Figure S146. ( $t_{1/2} = 0.30 \pm 0.04$  min)** Proteolysis of **29N** (50  $\mu$ M protein concentration in 20 mM sodium phosphate buffer, pH 7) by proteinase K (10 mg/mL), as monitored by HPLC. Data points are shown as black circles with error bars, and each represents the average of three replicate experiments. The solid red line represents the fit of the data to a monoexponential decay function, which was used to calculate the indicated half-lives.

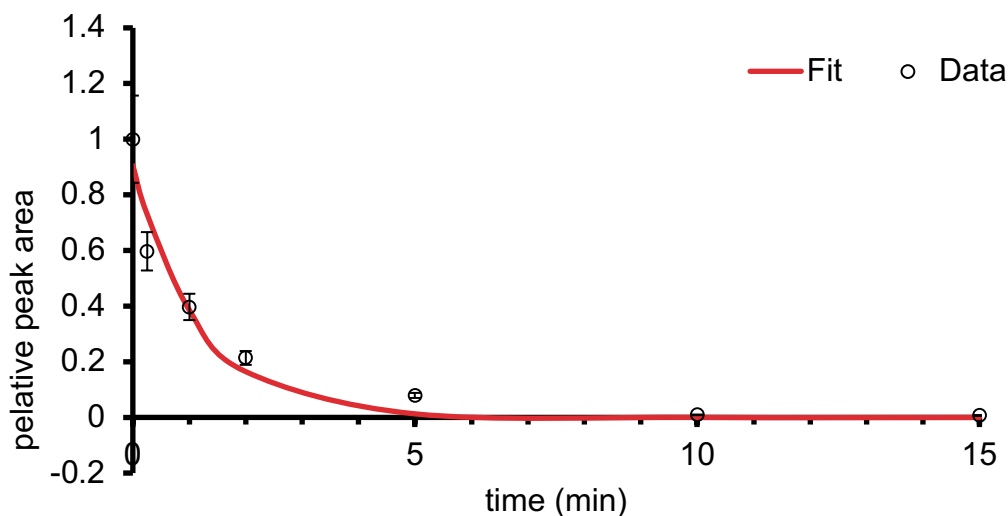

**Figure S147.** ( $t_{1/2} = 0.81 \pm 0.17$  min) Proteolysis of **29Np** (50  $\mu$ M protein concentration in 20 mM sodium phosphate buffer, pH 7) by proteinase K (10 mg/mL), as monitored by HPLC. Data points are shown as black circles with error bars, and each represents the average of three replicate experiments. The solid red line represents the fit of the data to a monoexponential decay function, which was used to calculate the indicated half-lives.

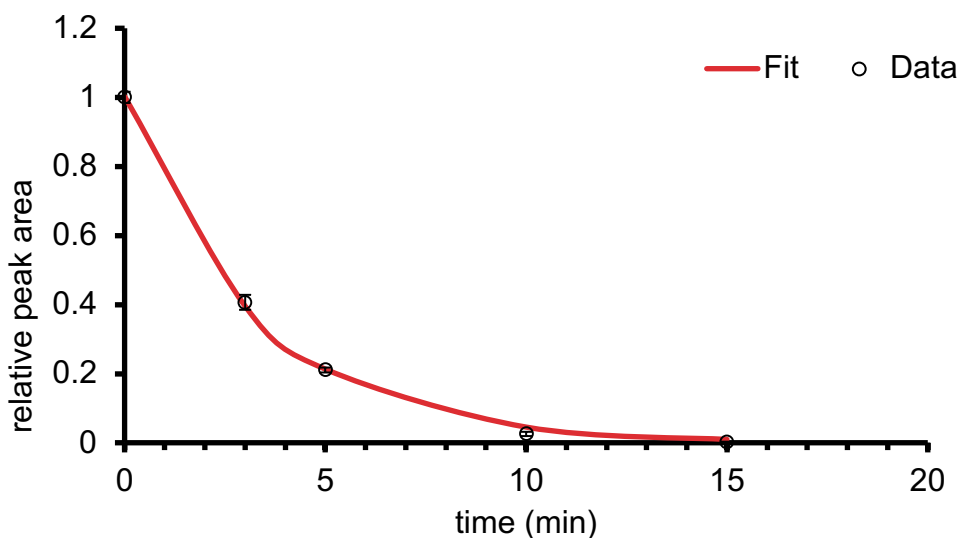

**Figure S148.** ( $t_{1/2} = 2.24 \pm 0.06$  min) Proteolysis of **29Nbp** (50  $\mu$ M protein concentration in 20 mM sodium phosphate buffer, pH 7) by proteinase K (10 mg/mL), as monitored by HPLC. Data points are shown as black circles with error bars, and each represents the average of three replicate experiments. The solid red line represents the fit of the data to a monoexponential decay function, which was used to calculate the indicated half-lives.



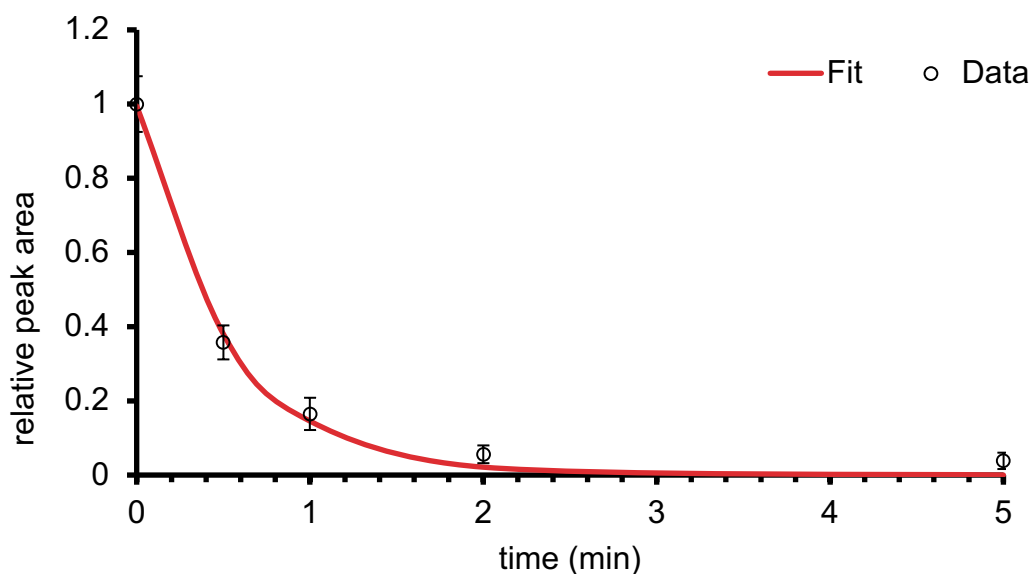

**Figure S149.** ( $t_{1/2} = 0.36 \pm 0.03$  min) Proteolysis of **32N** (50  $\mu$ M protein concentration in 20 mM sodium phosphate buffer, pH 7) by proteinase K (10 mg/mL), as monitored by HPLC. Data points are shown as black circles with error bars, and each represents the average of three replicate experiments. The solid red line represents the fit of the data to a monoexponential decay function, which was used to calculate the indicated half-lives.

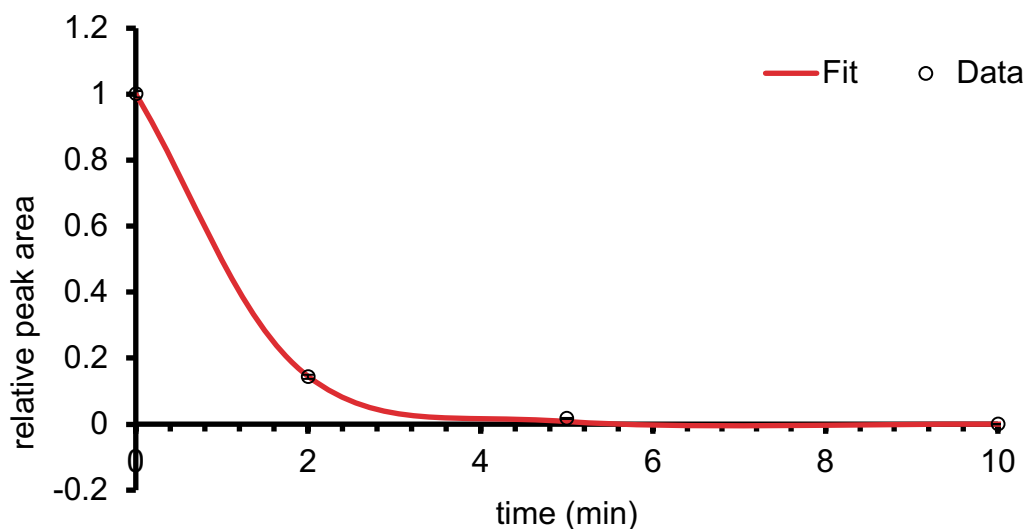

**Figure S150.** ( $t_{1/2} = 0.72 \pm 0.01$  min) Proteolysis of **32Np** (50  $\mu$ M protein concentration in 20 mM sodium phosphate buffer, pH 7) by proteinase K (10 mg/mL), as monitored by HPLC. Data points are shown as black circles with error bars, and each represents the average of three replicate experiments. The solid red line represents the fit of the data to a monoexponential decay function, which was used to calculate the indicated half-lives.

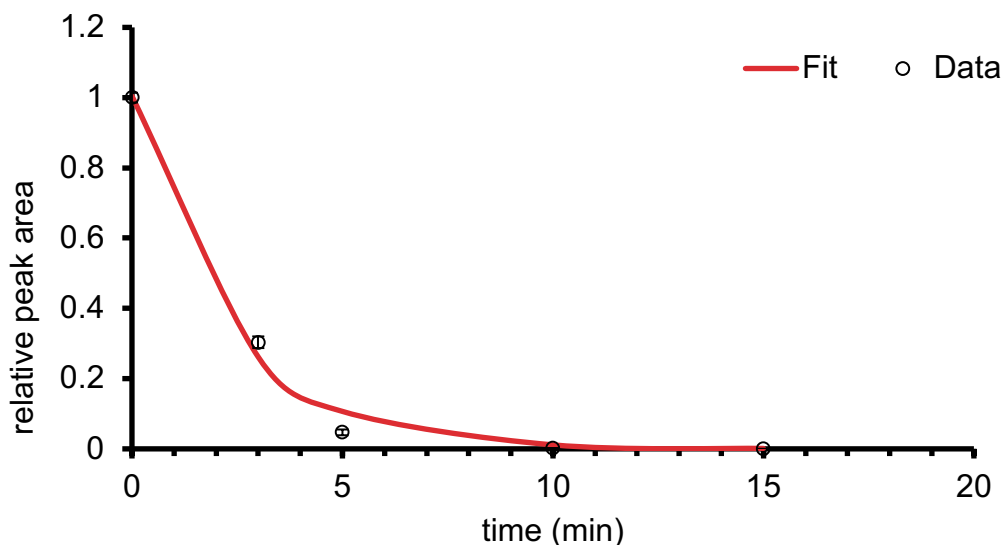

**Figure S151. ( $t_{1/2} = 1.54 \pm 0.16$  min)** Proteolysis of **32Nbp** (50  $\mu$ M protein concentration in 20 mM sodium phosphate buffer, pH 7) by proteinase K (10 mg/mL), as monitored by HPLC. Data points are shown as black circles with error bars, and each represents the average of three replicate experiments. The solid red line represents the fit of the data to a monoexponential decay function, which was used to calculate the indicated half-lives.

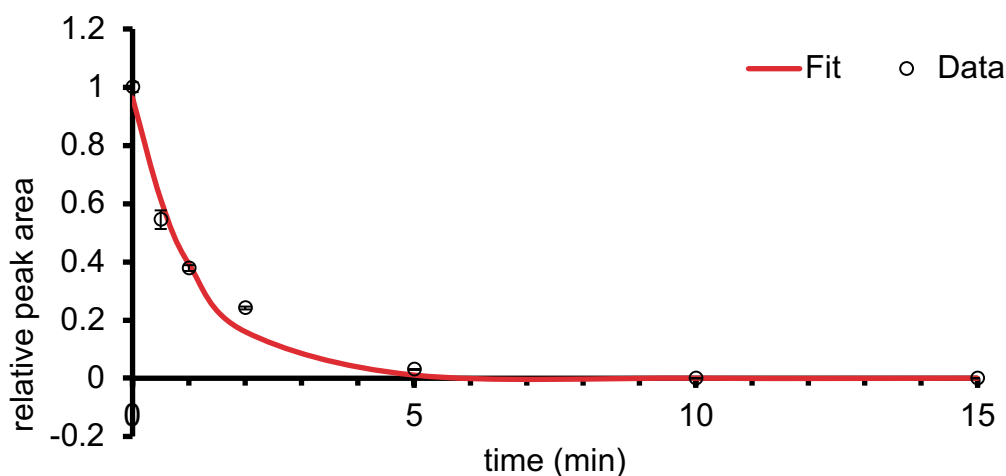

**Figure S152. ( $t_{1/2} = 0.77 \pm 0.09$  min)** Proteolysis of **16X** (50  $\mu$ M protein concentration in 20 mM sodium phosphate buffer, pH 7) by proteinase K (10 mg/mL), as monitored by HPLC. Data points are shown as black circles with error bars, and each represents the average of three replicate experiments. The solid red line represents the fit of the data to a monoexponential decay function, which was used to calculate the indicated half-lives.

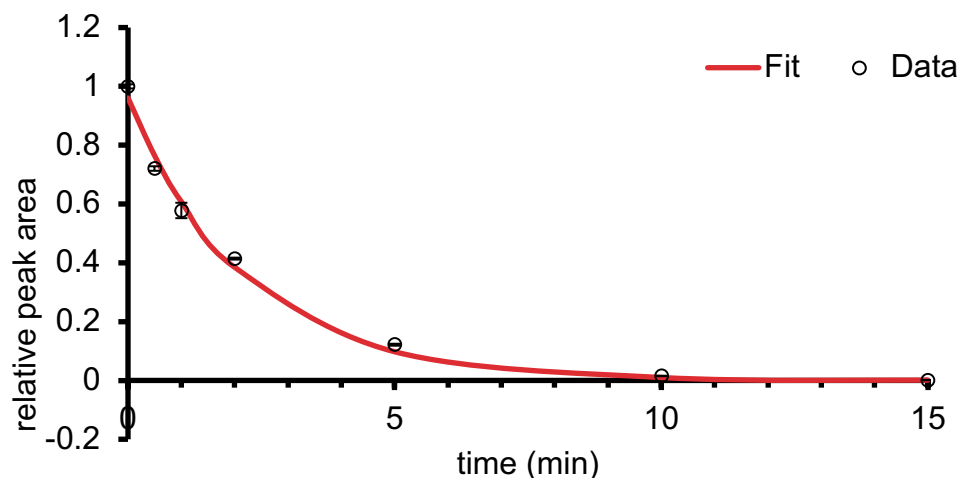

**Figure S153. ( $t_{1/2} = 1.52 \pm 0.12$  min)** Proteolysis of **16Xp** (50  $\mu$ M protein concentration in 20 mM sodium phosphate buffer, pH 7) by proteinase K (10 mg/mL), as monitored by HPLC. Data points are shown as black circles with error bars, and each represents the average of three replicate experiments. The solid red line represents the fit of the data to a monoexponential decay function, which was used to calculate the indicated half-lives.

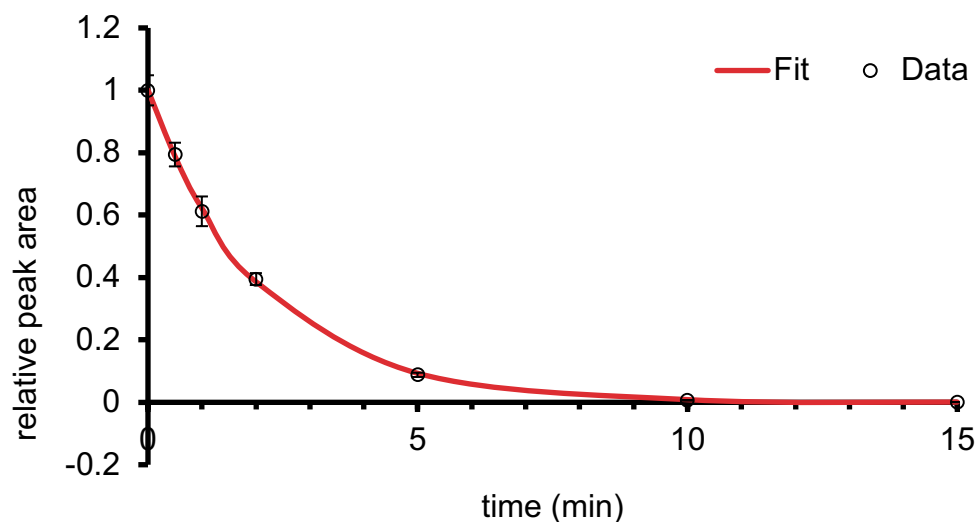

**Figure S154. ( $t_{1/2} = 1.46 \pm 0.02$  min)** Proteolysis of **18X** (50  $\mu$ M protein concentration in 20 mM sodium phosphate buffer, pH 7) by proteinase K (10 mg/mL), as monitored by HPLC. Data points are shown as black circles with error bars, and each represents the average of three replicate experiments. The solid red line represents the fit of the data to a monoexponential decay function, which was used to calculate the indicated half-lives.

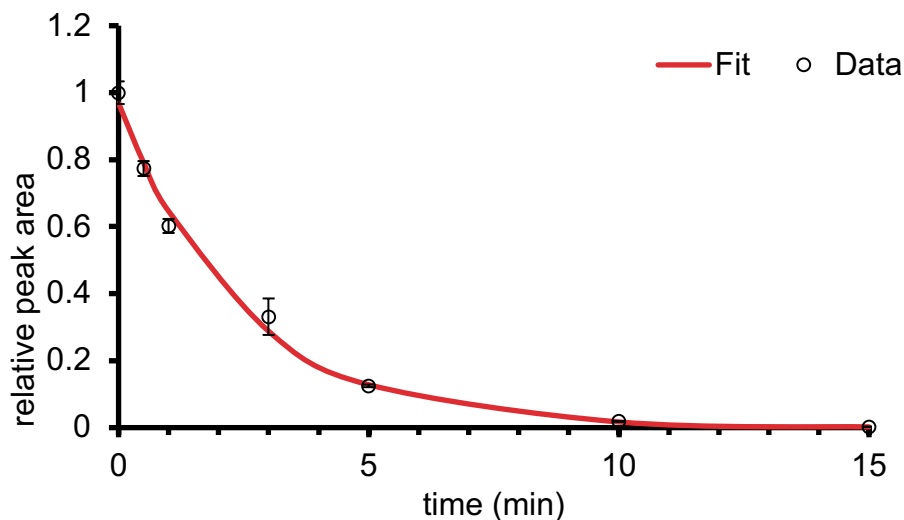

**Figure S155. ( $t_{1/2} = 1.71 \pm 0.12$  min)** Proteolysis of **18Xp** (50  $\mu$ M protein concentration in 20 mM sodium phosphate buffer, pH 7) by proteinase K (10 mg/mL), as monitored by HPLC. Data points are shown as black circles with error bars, and each represents the average of three replicate experiments. The solid red line represents the fit of the data to a monoexponential decay function, which was used to calculate the indicated half-lives.

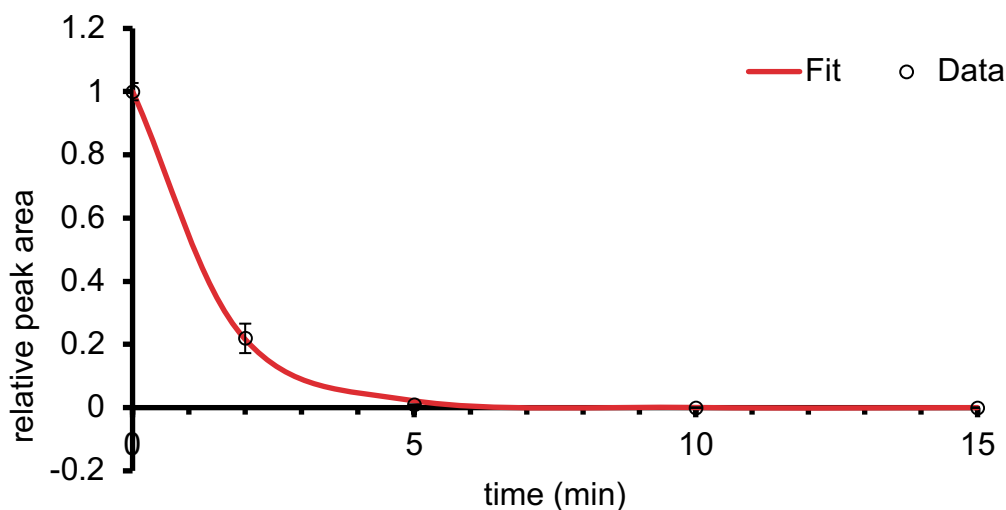

**Figure S156. ( $t_{1/2} = 0.90 \pm 0.02$  min)** Proteolysis of **19X** (50  $\mu$ M protein concentration in 20 mM sodium phosphate buffer, pH 7) by proteinase K (10 mg/mL), as monitored by HPLC. Data points are shown as black circles with error bars, and each represents the average of three replicate experiments. The solid red line represents the fit of the data to a monoexponential decay function, which was used to calculate the indicated half-lives.

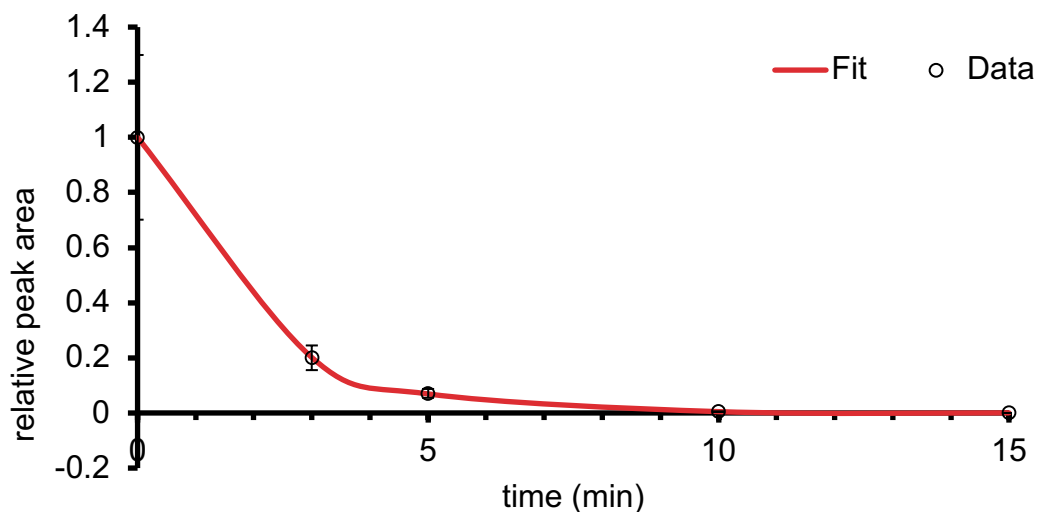

**Figure S157. ( $t_{1/2} = 1.30 \pm 0.01$  min)** Proteolysis of **19Xp** (50  $\mu$ M protein concentration in 20 mM sodium phosphate buffer, pH 7) by proteinase K (10 mg/mL), as monitored by HPLC. Data points are shown as black circles with error bars, and each represents the average of three replicate experiments. The solid red line represents the fit of the data to a monoexponential decay function, which was used to calculate the indicated half-lives.

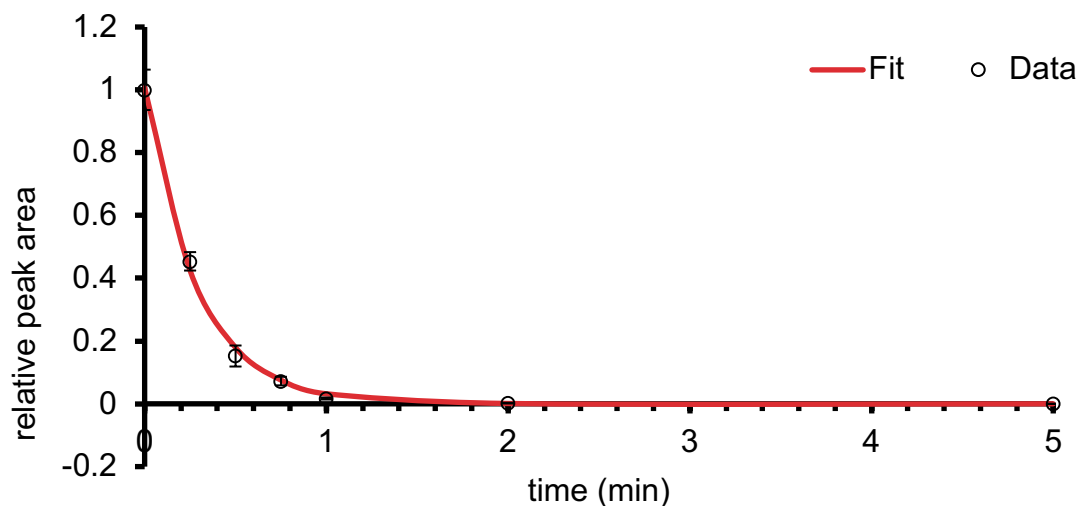

**Figure S158. ( $t_{1/2} = 0.20 \pm 0.01$  min)** Proteolysis of **23X** (50  $\mu$ M protein concentration in 20 mM sodium phosphate buffer, pH 7) by proteinase K (10 mg/mL), as monitored by HPLC. Data points are shown as black circles with error bars, and each represents the average of three replicate experiments. The solid red line represents the fit of the data to a monoexponential decay function, which was used to calculate the indicated half-lives.

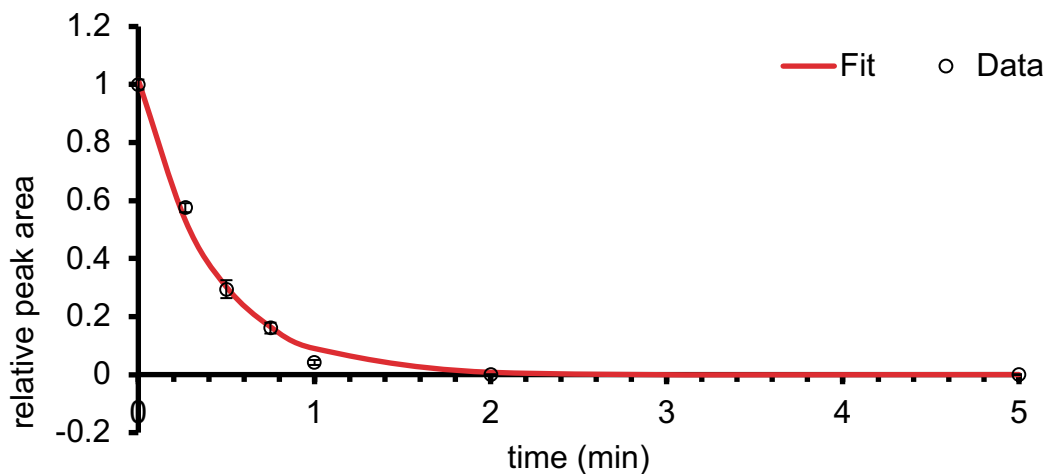

**Figure S159.** ( $t_{1/2} = 0.28 \pm 0.02$  min) Proteolysis of **23Xp** (50  $\mu$ M protein concentration in 20 mM sodium phosphate buffer, pH 7) by proteinase K (10 mg/mL), as monitored by HPLC. Data points are shown as black circles with error bars, and each represents the average of three replicate experiments. The solid red line represents the fit of the data to a monoexponential decay function, which was used to calculate the indicated half-lives.

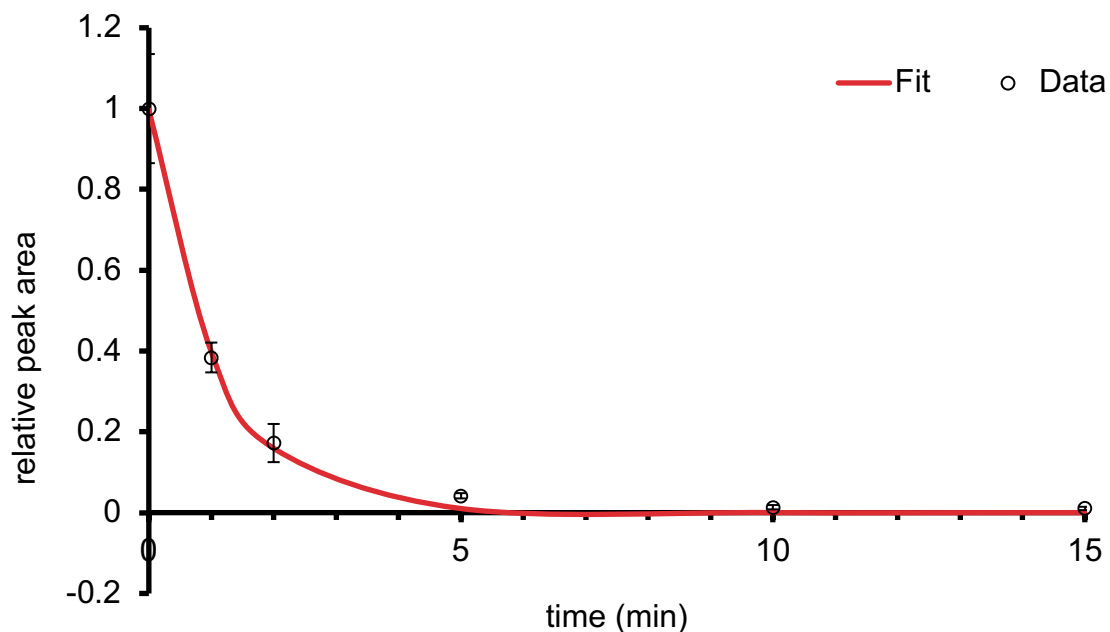

**Figure S160.** ( $t_{1/2} = 0.75 \pm 0.04$  min) Proteolysis of **27X** (50  $\mu$ M protein concentration in 20 mM sodium phosphate buffer, pH 7) by proteinase K (10 mg/mL), as monitored by HPLC. Data points are shown as black circles with error bars, and each represents the average of three replicate experiments. The solid red line represents the fit of the data to a monoexponential decay function, which was used to calculate the indicated half-lives.

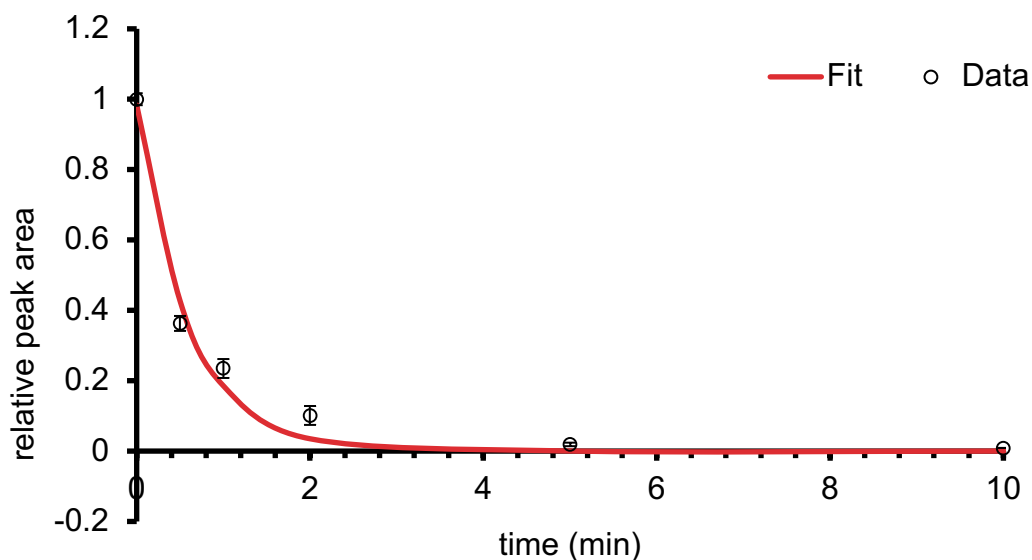

**Figure S161.** ( $t_{1/2} = 0.42 \pm 0.05$  min) Proteolysis of **27X** (50  $\mu$ M protein concentration in 20 mM sodium phosphate buffer, pH 7) by proteinase K (10 mg/mL), as monitored by HPLC. Data points are shown as black circles with error bars, and each represents the average of three replicate experiments. The solid red line represents the fit of the data to a monoexponential decay function, which was used to calculate the indicated half-lives.

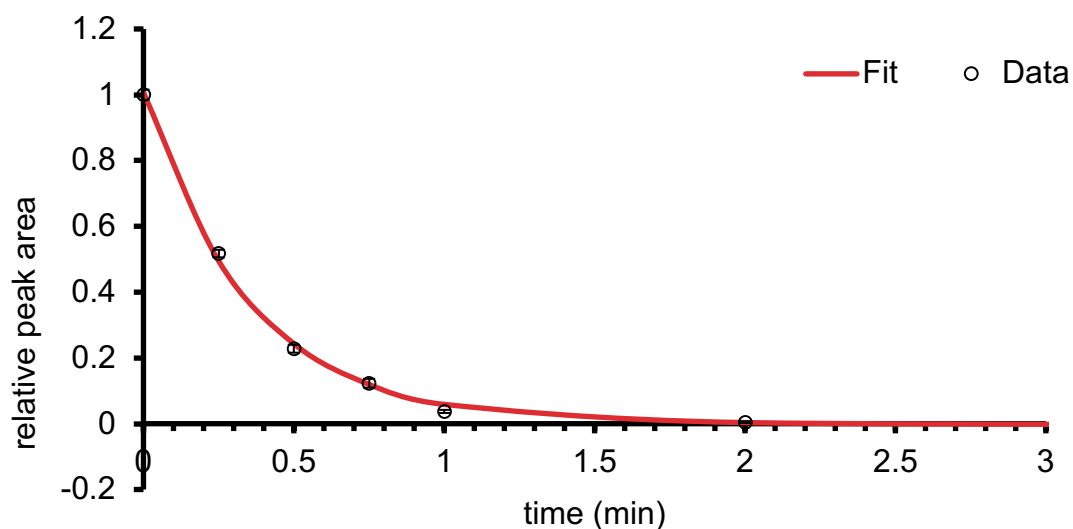

**Figure S162.** ( $t_{1/2} = 0.24 \pm 0.01$  min) Proteolysis of **29X** (50  $\mu$ M protein concentration in 20 mM sodium phosphate buffer, pH 7) by proteinase K (10 mg/mL), as monitored by HPLC. Data points are shown as black circles with error bars, and each represents the average of three replicate experiments. The solid red line represents the fit of the data to a monoexponential decay function, which was used to calculate the indicated half-lives.

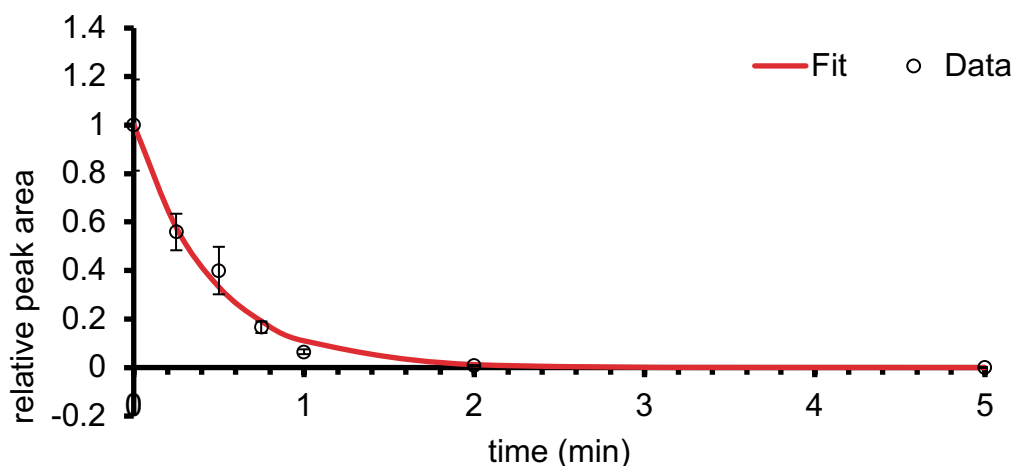

**Figure S163. ( $t_{1/2} = 0.31 \pm 0.02$  min)** Proteolysis of **29Xp** (50  $\mu$ M protein concentration in 20 mM sodium phosphate buffer, pH 7) by proteinase K (10 mg/mL), as monitored by HPLC. Data points are shown as black circles with error bars, and each represents the average of three replicate experiments. The solid red line represents the fit of the data to a monoexponential decay function, which was used to calculate the indicated half-lives.

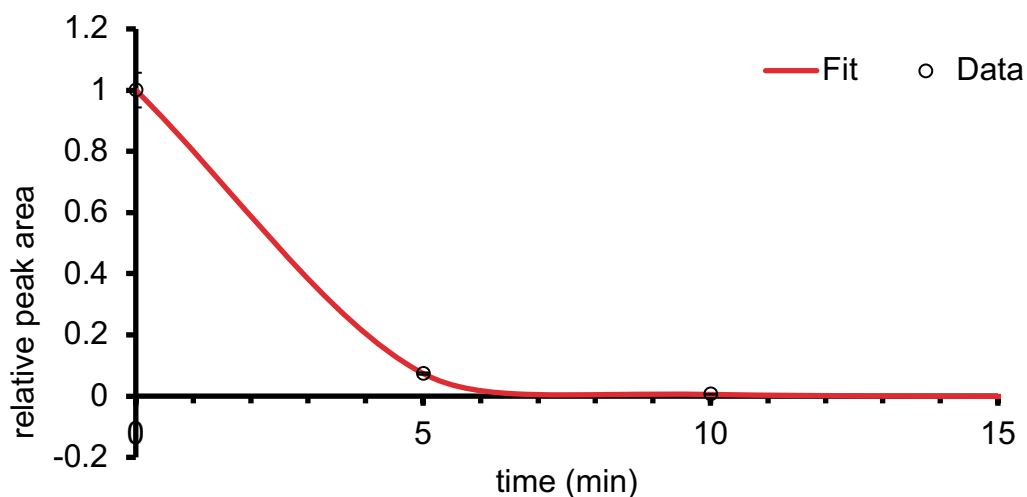

**Figure S164. ( $t_{1/2} = 1.33 \pm 0.02$  min)** Proteolysis of **32X** (50  $\mu$ M protein concentration in 20 mM sodium phosphate buffer, pH 7) by proteinase K (10 mg/mL), as monitored by HPLC. Data points are shown as black circles with error bars, and each represents the average of three replicate experiments. The solid red line represents the fit of the data to a monoexponential decay function, which was used to calculate the indicated half-lives.



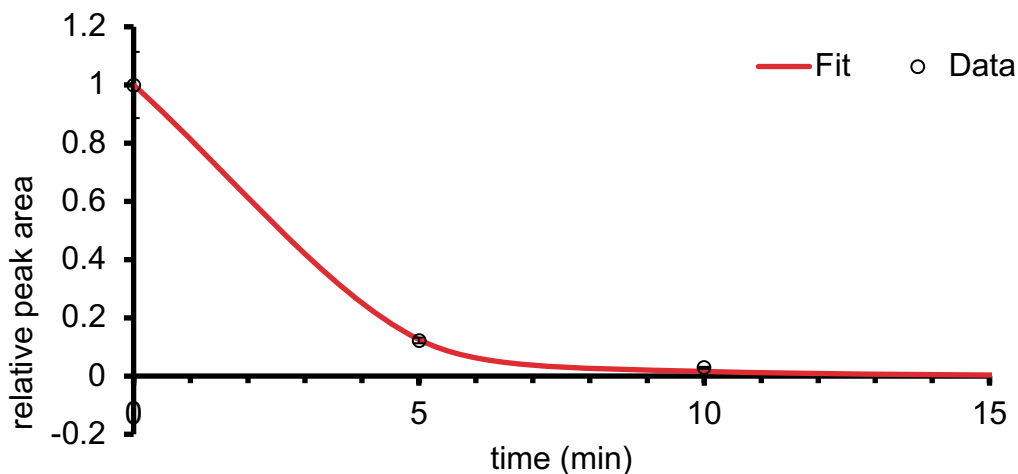

**Figure S165.** ( $t_{1/2} = 1.67 \pm 0.04$  min) Proteolysis of **32Xp** (50  $\mu$ M protein concentration in 20 mM sodium phosphate buffer, pH 7) by proteinase K (10 mg/mL), as monitored by HPLC. Data points are shown as black circles with error bars, and each represents the average of three replicate experiments. The solid red line represents the fit of the data to a monoexponential decay function, which was used to calculate the indicated half-lives.

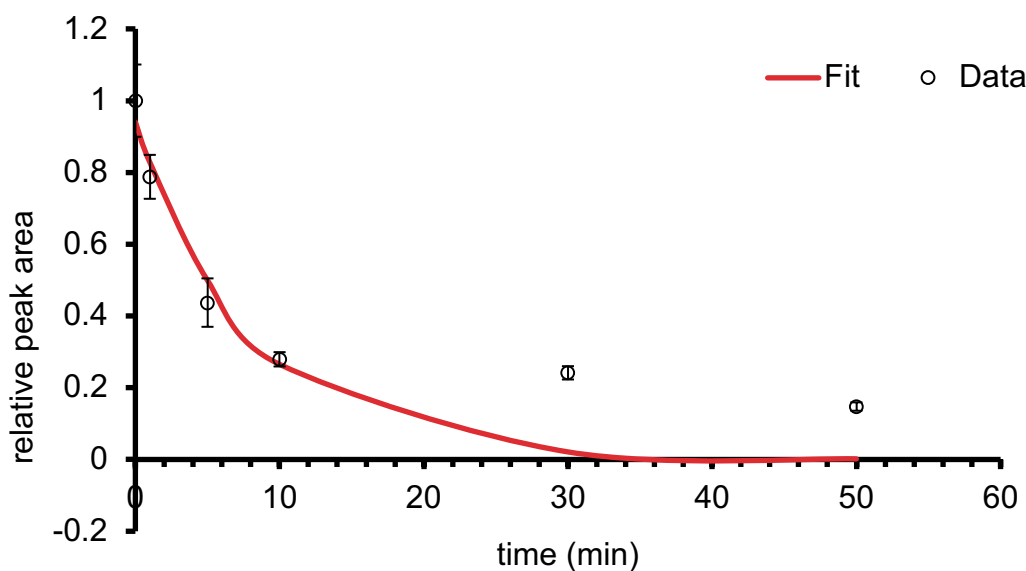

**Figure S166.** ( $t_{1/2} = 5.48 \pm 1.86$  min) Proteolysis of **16Z** (50  $\mu$ M protein concentration in 20 mM sodium phosphate buffer, pH 7) by proteinase K (10 mg/mL), as monitored by HPLC. Data points are shown as black circles with error bars, and each represents the average of three replicate experiments. The solid red line represents the fit of the data to a monoexponential decay function, which was used to calculate the indicated half-lives.

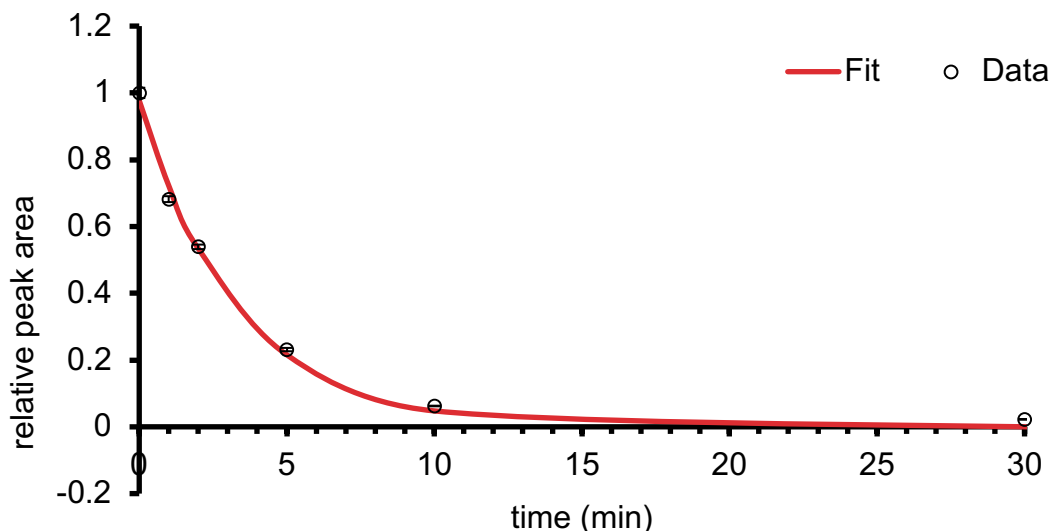

**Figure S167. ( $t_{1/2} = 1.67 \pm 0.04$  min)** Proteolysis of **16Zp** (50  $\mu$ M protein concentration in 20 mM sodium phosphate buffer, pH 7) by proteinase K (10 mg/mL), as monitored by HPLC. Data points are shown as black circles with error bars, and each represents the average of three replicate experiments. The solid red line represents the fit of the data to a monoexponential decay function, which was used to calculate the indicated half-lives.

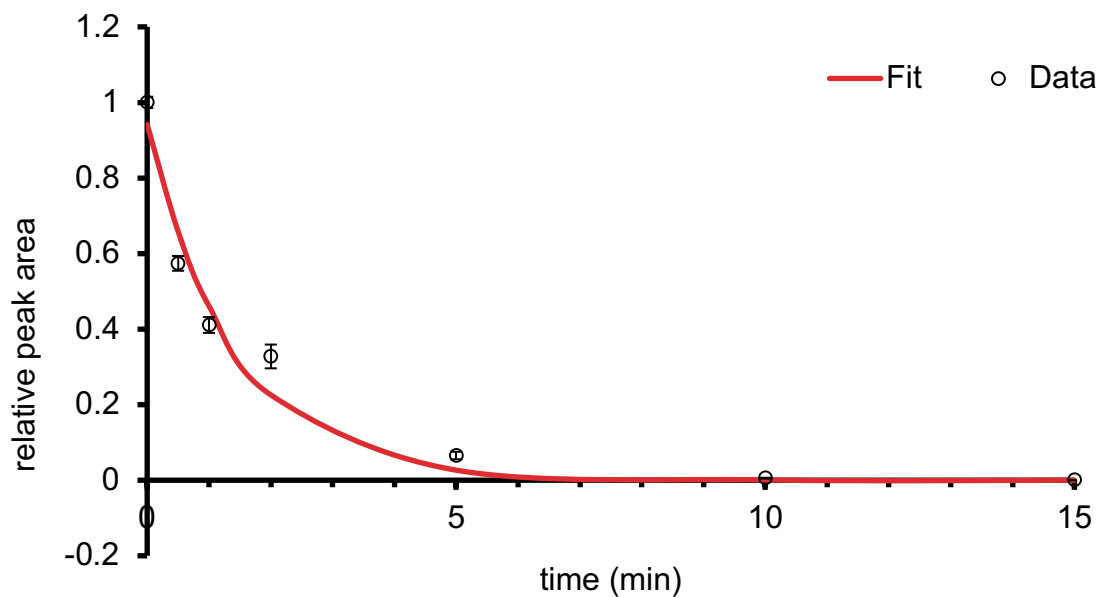

**Figure S167. ( $t_{1/2} = 0.97 \pm 0.16$  min)** Proteolysis of **18Z** (50  $\mu$ M protein concentration in 20 mM sodium phosphate buffer, pH 7) by proteinase K (10 mg/mL), as monitored by HPLC. Data points are shown as black circles with error bars, and each represents the average of three replicate experiments. The solid red line represents the fit of the data to a monoexponential decay function, which was used to calculate the indicated half-lives.

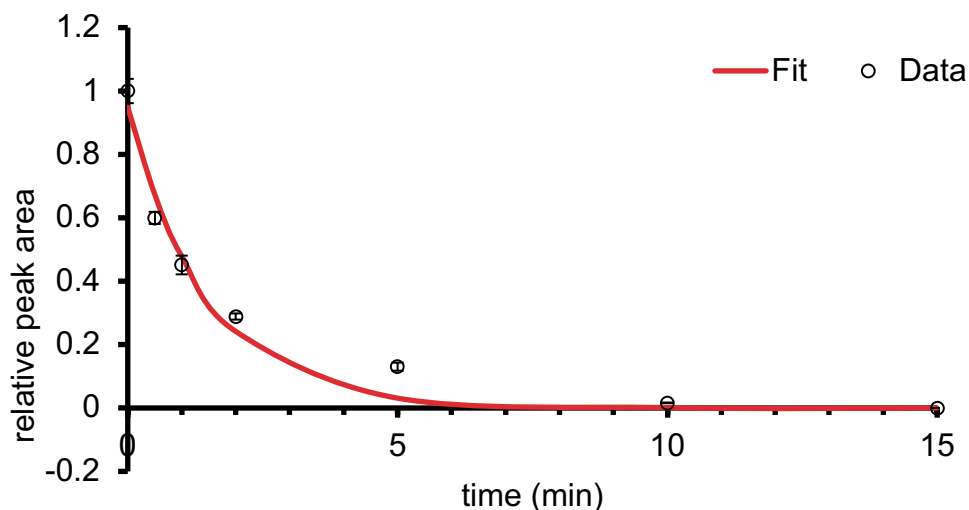

**Figure S168. ( $t_{1/2} = 1.01 \pm 0.15$  min)** Proteolysis of **18Zp** (50  $\mu$ M protein concentration in 20 mM sodium phosphate buffer, pH 7) by proteinase K (10 mg/mL), as monitored by HPLC. Data points are shown as black circles with error bars, and each represents the average of three replicate experiments. The solid red line represents the fit of the data to a monoexponential decay function, which was used to calculate the indicated half-lives.

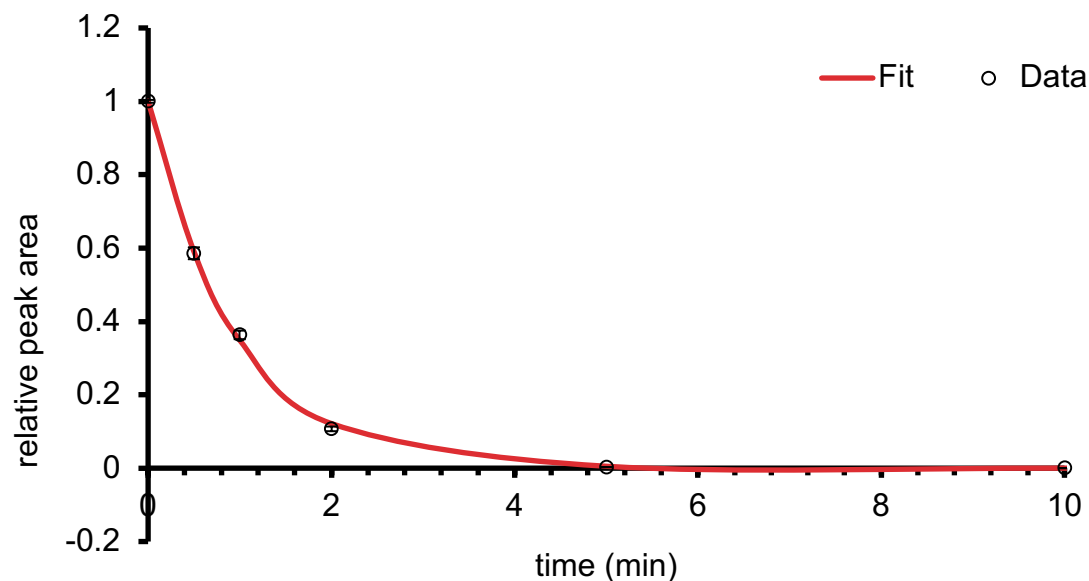

**Figure S169. ( $t_{1/2} = 0.66 \pm 0.01$  min)** Proteolysis of **19Z** (50  $\mu$ M protein concentration in 20 mM sodium phosphate buffer, pH 7) by proteinase K (10 mg/mL), as monitored by HPLC. Data points are shown as black circles with error bars, and each represents the average of three replicate experiments. The solid red line represents the fit of the data to a monoexponential decay function, which was used to calculate the indicated half-lives.

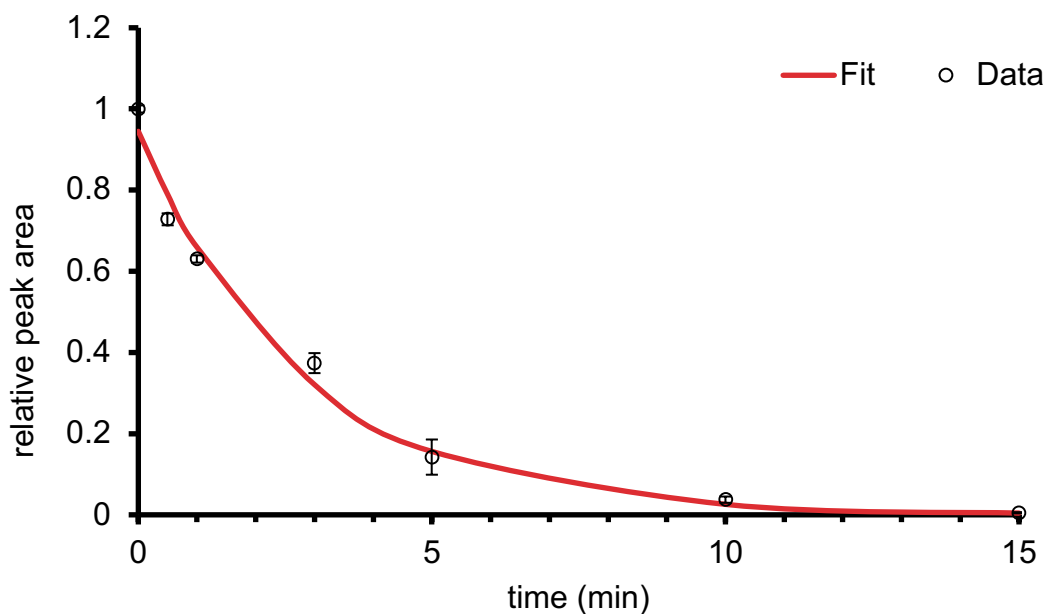

**Figure S170. ( $t_{1/2} = 1.93 \pm 0.2$  min)** Proteolysis of **19Zp** (50  $\mu$ M protein concentration in 20 mM sodium phosphate buffer, pH 7) by proteinase K (10 mg/mL), as monitored by HPLC. Data points are shown as black circles with error bars, and each represents the average of three replicate experiments. The solid red line represents the fit of the data to a monoexponential decay function, which was used to calculate the indicated half-lives.

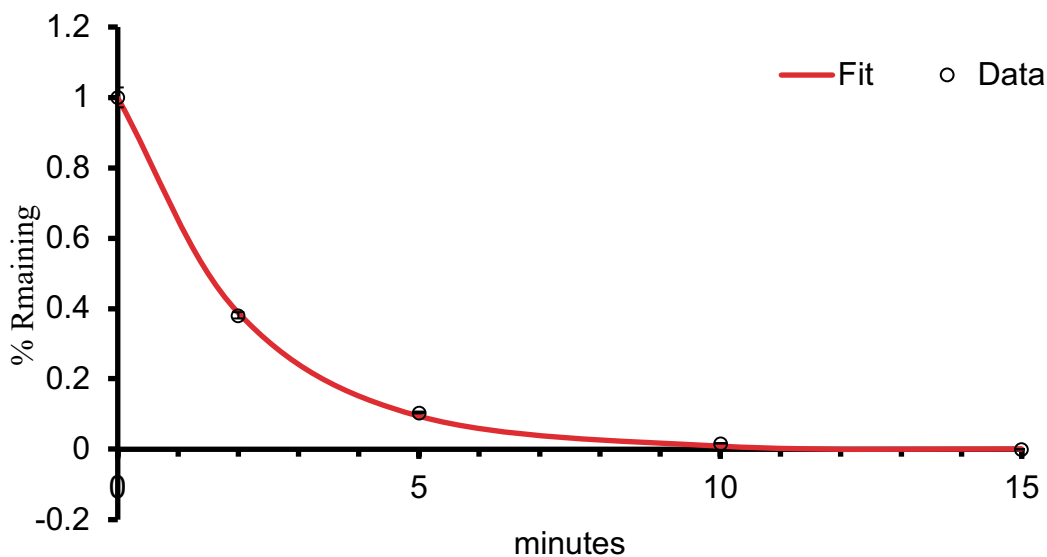

**Figure S171. ( $t_{1/2} = 1.47 \pm 0.03$  min)** Proteolysis of **23Z** (50  $\mu$ M protein concentration in 20 mM sodium phosphate buffer, pH 7) by proteinase K (10 mg/mL), as monitored by HPLC. Data points are shown as black circles with error bars, and each represents the average of three replicate experiments. The solid red line represents the fit of the data to a monoexponential decay function, which was used to calculate the indicated half-lives.

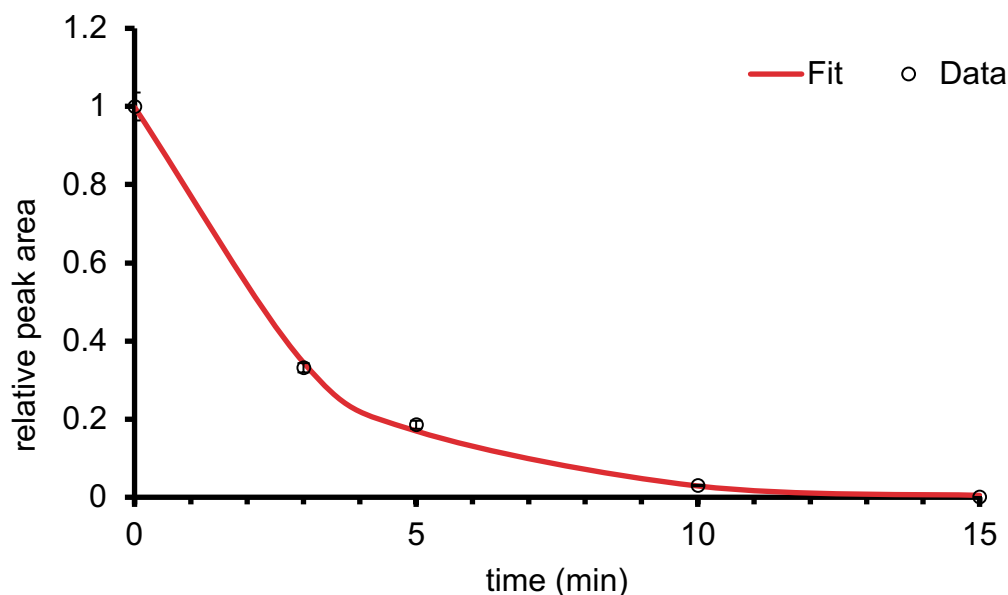

**Figure S172. ( $t_{1/2} = 1.95 \pm 0.06$  min)** Proteolysis of **23Zp** (50  $\mu$ M protein concentration in 20 mM sodium phosphate buffer, pH 7) by proteinase K (10 mg/mL), as monitored by HPLC. Data points are shown as black circles with error bars, and each represents the average of three replicate experiments. The solid red line represents the fit of the data to a monoexponential decay function, which was used to calculate the indicated half-lives.

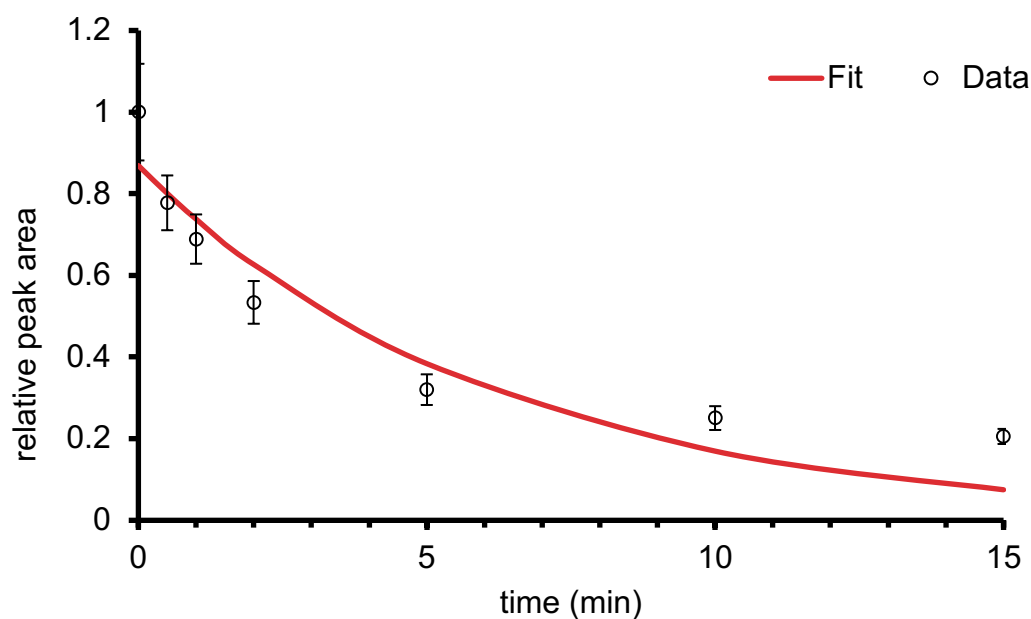

**Figure S173. ( $t_{1/2} = 4.24 \pm 1.16$  min)** Proteolysis of **27Z** (50  $\mu$ M protein concentration in 20 mM sodium phosphate buffer, pH 7) by proteinase K (10 mg/mL), as monitored by HPLC. Data points are shown as black circles with error bars, and each represents the average of three replicate experiments. The solid red line represents the fit of the data to a monoexponential decay function, which was used to calculate the indicated half-lives.

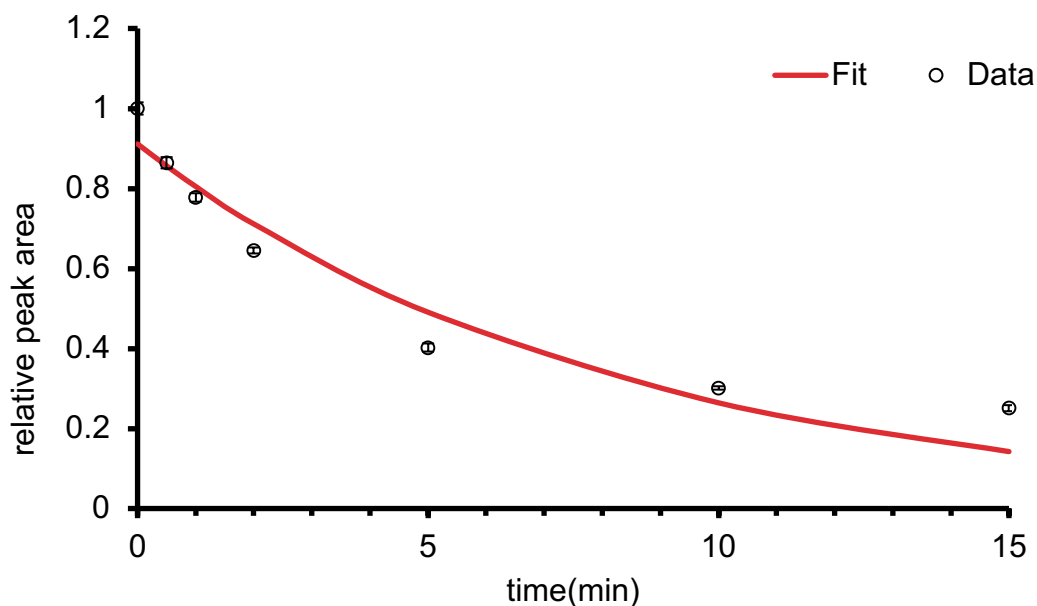

**Figure S174.** ( $t_{1/2} = 5.60 \pm 1.09$  min) Proteolysis of **27Zp** (50  $\mu$ M protein concentration in 20 mM sodium phosphate buffer, pH 7) by proteinase K (10 mg/mL), as monitored by HPLC. Data points are shown as black circles with error bars, and each represents the average of three replicate experiments. The solid red line represents the fit of the data to a monoexponential decay function, which was used to calculate the indicated half-lives.

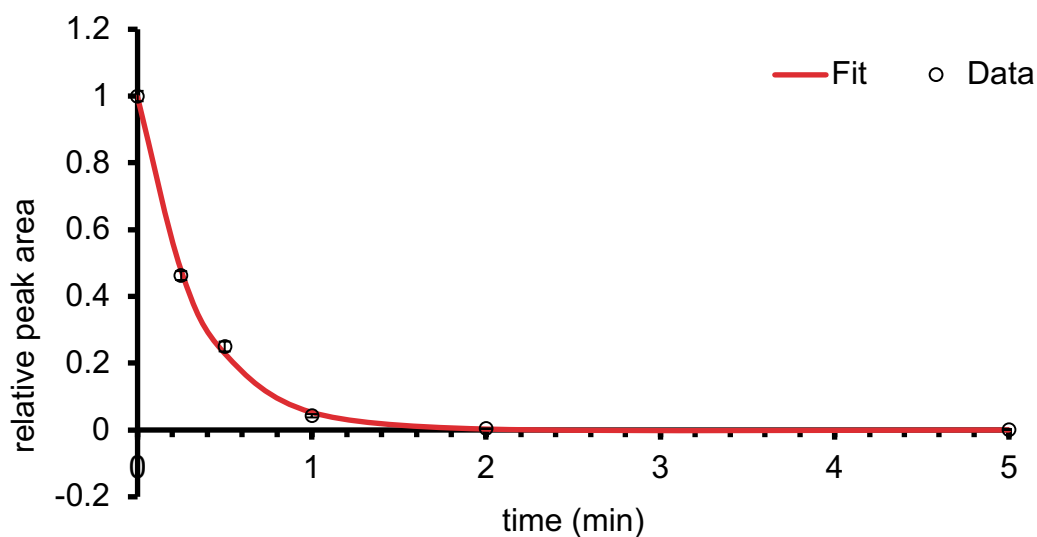

**Figure S175.** ( $t_{1/2} = 0.24 \pm 0.01$  min) Proteolysis of **29Z** (50  $\mu$ M protein concentration in 20 mM sodium phosphate buffer, pH 7) by proteinase K (10 mg/mL), as monitored by HPLC. Data points are shown as black circles with error bars, and each represents the average of three replicate experiments. The solid red line represents the fit of the data to a monoexponential decay function, which was used to calculate the indicated half-lives.

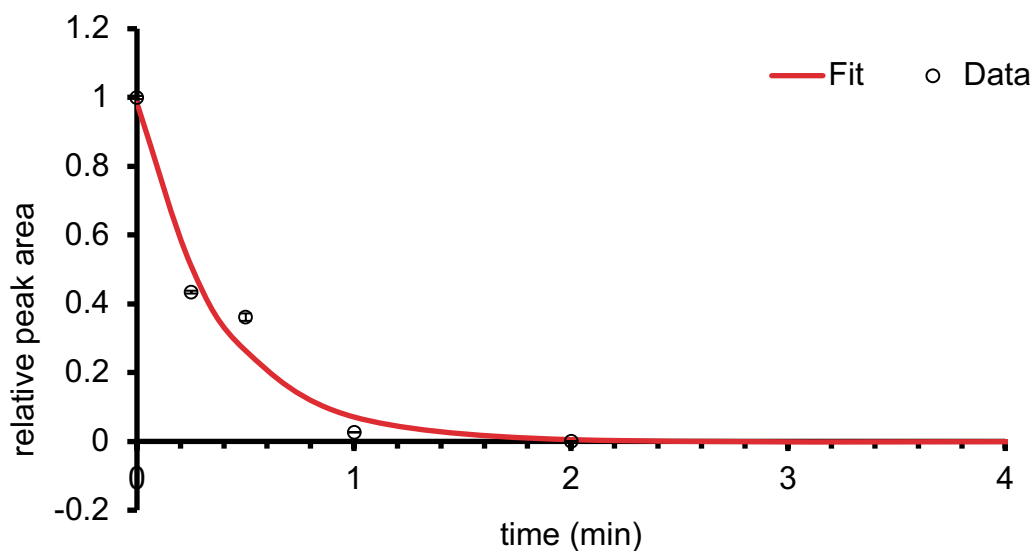

**Figure S176.** ( $t_{1/2} = 0.26 \pm 0.04$  min) Proteolysis of **29Zp** (50  $\mu$ M protein concentration in 20 mM sodium phosphate buffer, pH 7) by proteinase K (10 mg/mL), as monitored by HPLC. Data points are shown as black circles with error bars, and each represents the average of three replicate experiments. The solid red line represents the fit of the data to a monoexponential decay function, which was used to calculate the indicated half-lives.

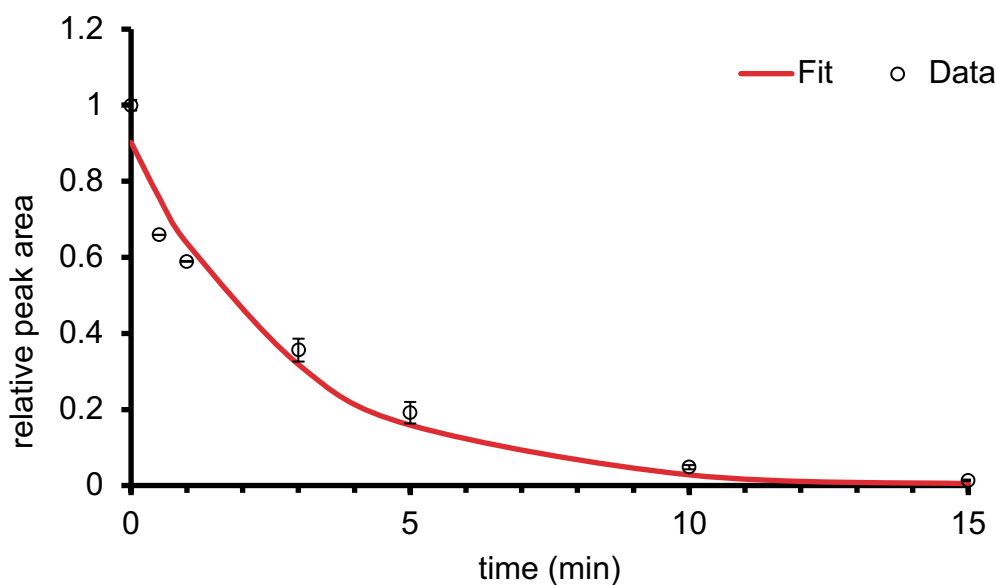

**Figure S177.** ( $t_{1/2} = 1.99 \pm 0.33$  min) Proteolysis of **32Z** (50  $\mu$ M protein concentration in 20 mM sodium phosphate buffer, pH 7) by proteinase K (10 mg/mL), as monitored by HPLC. Data points are shown as black circles with error bars, and each represents the average of three replicate experiments. The solid red line represents the fit of the data to a monoexponential decay function, which was used to calculate the indicated half-lives.

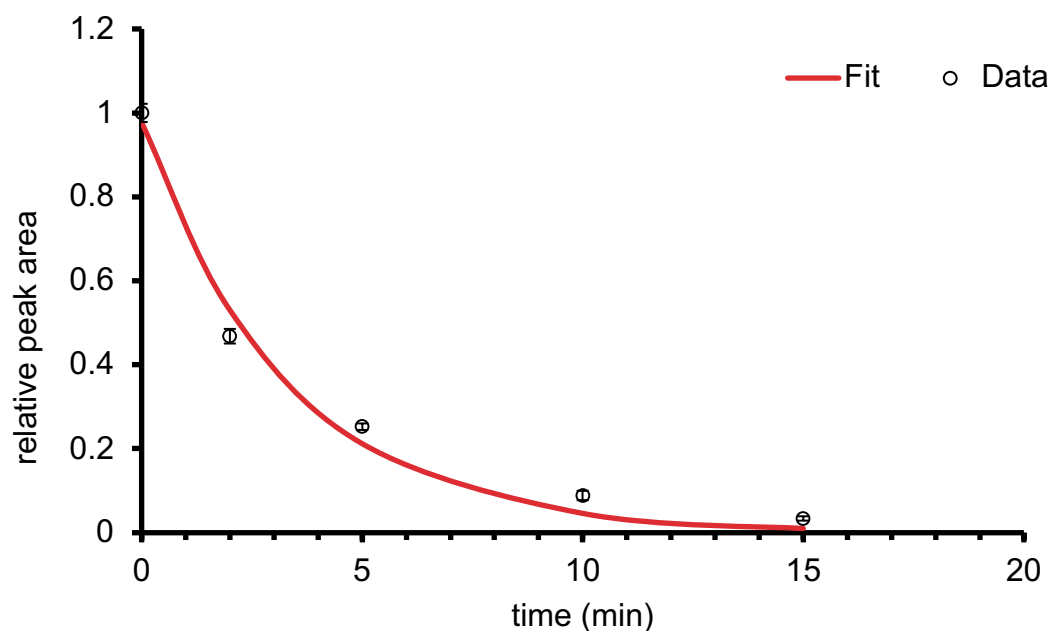

**Figure S178. ( $t_{1/2} = 2.27 \pm 0.28$  min)** Proteolysis of **32Zp** (50  $\mu$ M protein concentration in 20 mM sodium phosphate buffer, pH 7) by proteinase K (10 mg/mL), as monitored by HPLC. Data points are shown as black circles with error bars, and each represents the average of three replicate experiments. The solid red line represents the fit of the data to a monoexponential decay function, which was used to calculate the indicated half-lives.



## References

- (1) Lawrence, P. B., Gavrilov, Y., Matthews, S. S., Langlois, M. I., Shental-Bechor, D., Greenblatt, H. M., Pandey, B. K., Smith, M. S., Paxman, R., Torgerson, C. D., et al. (2014) Criteria for Selecting PEGylation Sites on Proteins for Higher Thermodynamic and Proteolytic Stability. *J. Am. Chem. Soc.* *136*, 17547-17560.
- (2) Lawrence, P. B., Billings, W. M., Miller, M. B., Pandey, B. K., Stephens, A. R., Langlois, M. I., and Price, J. L. (2016) Conjugation Strategy Strongly Impacts the Conformational Stability of a PEG-Protein Conjugate. *ACS Chem. Biol.* *11*, 1805–1809.
- (3) Garofalo, A., Parat, A., Bordeianu, C., Ghobril, C., Kueny-Stotz, M., Walter, A., Jouhannaud, J., Begin-Colin, S., and Felder-Flesch, D. (2014) Efficient synthesis of small-sized phosphonated dendrons: potential organic coatings of iron oxide nanoparticles. *New J. Chem.* *38*, 5226–5239.
- (4) Deiters, A., Cropp, T. A., Mukherji, M., Chin, J. W., Anderson, J. C., and Schultz, P. G. (2003) Adding Amino Acids with Novel Reactivity to the Genetic Code of *Saccharomyces Cerevisiae*. *J. Am. Chem. Soc.* *125*, 11782-11783.
- (5) Edelhoch, H. (1967) Spectroscopic Determination of Tryptophan and Tyrosine in Proteins. *Biochemistry* *6*, 1948–1954.
